# Supplementary material
Source: publisher figshare collection journal article supplement (https://acs.figshare.com/ndownloader/files/3706888)
Supplement: Supplementary file 1 [file 3706888]

## Sheet: HLA-B27 (2168)
n	m/z	z	m/z Error	peptide	c04	length	Uniprot AN	mods	FDR peptide
1	630.845	2	-0.00197138	GRWFVAGGAAVGL	FALSE	13	Q9H3K2	NA_NA_NA_NA_NA_NA_NA_NA_NA_NA_NA_NA_NA_NA_NA	0
2	604.891	2	0.000353121	VRLLLPGELAK	FALSE	11	Q96A08	NA_NA_NA_NA_NA_NA_NA_NA_NA_NA_NA_NA_NA	0
3	734.867	2	0.00224262	VRWYVDGPASTAF	FALSE	13	P48449	NA_NA_NA_NA_NA_NA_NA_NA_NA_NA_NA_NA_NA_NA_NA	0
4	526.287	2	-0.00115738	NRFAGFGIGL	FALSE	10	Q96AG3	NA_NA_NA_NA_NA_NA_NA_NA_NA_NA_NA_NA	0
5	697.855	2	-0.00233188	SRLSWLDGSGLGF	FALSE	13	P54105	NA_NA_NA_NA_NA_NA_NA_NA_NA_NA_NA_NA_NA_NA_NA	0
6	643.354	2	-0.000559885	SRHVILGTQQF	FALSE	11	O15371	NA_NA_NA_NA_NA_NA_NA_NA_NA_NA_NA_NA_NA	0
7	483.239	3	2.50667e-05	ARILLDNDHYAM	FALSE	12	Q86WA8	NA_NA_NA_NA_NA_NA_NA_NA_NA_NA_NA_NA_MetOX_NA	0
8	505.608	3	-0.000266926	KRWQNEKLGLDAG	FALSE	13	P11912	NA_NA_NA_NA_NA_NA_NA_NA_NA_NA_NA_NA_NA_NA_NA	0
9	352.436	4	0.000713045	ARYDFSHEILR	FALSE	11	Q9BT30	NA_NA_NA_NA_NA_NA_NA_NA_NA_NA_NA_NA_NA	0
10	619.325	2	0.00121762	LALSPVPSHWM	FALSE	11	P40259	NA_NA_NA_NA_NA_NA_NA_NA_NA_NA_NA_NA_NA	0
11	615.357	2	0.000886121	VRMNVLADALK	FALSE	11	P62244	NA_NA_NA_NA_NA_NA_NA_NA_NA_NA_NA_NA_NA	0
12	576.305	2	-0.00164388	SHVAVENALGL	FALSE	11	O00571	Ac_NA_NA_NA_NA_NA_NA_NA_NA_NA_NA_NA_NA	0
13	603.796	2	-0.00107488	GRNDGVGQISGF	FALSE	12	Q9BRQ8	NA_NA_NA_NA_NA_NA_NA_NA_NA_NA_NA_NA_NA_NA	0
14	699.855	2	-0.00170138	YRFDPLGIVDGF	FALSE	12	Q32MH5	NA_NA_NA_NA_NA_NA_NA_NA_NA_NA_NA_NA_NA_NA	0
15	577.286	2	-0.00139738	GRYGISGELAM	FALSE	11	Q9NUQ8	NA_NA_NA_NA_NA_NA_NA_NA_NA_NA_NA_NA_NA	0
16	400.569	3	-0.00631559	ARAALQELLSK	FALSE	11	P62851	NA_NA_NA_NA_NA_NA_NA_NA_NA_NA_NA_NA_NA	0
17	678.351	2	-0.00138238	SRFLQESNVLY	FALSE	11	P40763	NA_NA_NA_NA_NA_NA_NA_NA_NA_NA_NA_NA_NA	0
18	771.412	2	0.00098262	TRFDQVMKFIEK	FALSE	12	Q9HCN4	NA_NA_NA_NA_NA_NA_NA_NA_NA_NA_NA_NA_NA_NA	0
19	712.862	2	-0.000814377	ARLQWSSTELAY	FALSE	12	Q9UFC0	NA_NA_NA_NA_NA_NA_NA_NA_NA_NA_NA_NA_NA_NA	0
20	530.591	3	-0.00128226	KRFPGYDSESKEF	FALSE	13	P46777	NA_NA_NA_NA_NA_NA_NA_NA_NA_NA_NA_NA_NA_NA_NA	0
21	622.341	2	-0.00256088	LRFPGQLNADL	FALSE	11	Q13509	NA_NA_NA_NA_NA_NA_NA_NA_NA_NA_NA_NA_NA	0
22	607.292	2	0.00124062	TDAAVSFAKDF	FALSE	11	P05141	Ac_NA_NA_NA_NA_NA_NA_NA_NA_NA_NA_NA_NA	0
23	646.359	2	-0.00345338	SRIPFNQALVF	FALSE	11	Q9UHI6	NA_NA_NA_NA_NA_NA_NA_NA_NA_NA_NA_NA_NA	0
24	387.566	3	0.000237067	GRILSGVVTKM	FALSE	11	P62280	NA_NA_NA_NA_NA_NA_NA_NA_NA_NA_NA_NA_NA	0
25	602.764	2	-0.00143938	SRFSGSGSGTDF	FALSE	12	P04431	NA_NA_NA_NA_NA_NA_NA_NA_NA_NA_NA_NA_NA_NA	0
26	478.26	3	-0.000378592	RRLQIEDFEAR	FALSE	11	Q9P0J0	NA_NA_NA_NA_NA_NA_NA_NA_NA_NA_NA_NA_NA	0
27	596.836	2	-0.00291088	KRLDVTVQSF	FALSE	10	Q8NCA5	NA_NA_NA_NA_NA_NA_NA_NA_NA_NA_NA_NA	0
28	617.829	2	-0.00181688	QRSLINSNVGF	FALSE	11	Q9NR30	NA_NA_NA_NA_NA_NA_NA_NA_NA_NA_NA_NA_NA	0
29	643.325	2	0.00157812	IGIQTDSQSSLH	FALSE	12	Q9P2K3	NA_NA_NA_NA_NA_NA_NA_NA_NA_NA_NA_NA_NA_NA	0
30	360.206	4	0.000567048	GRYFNSKVPITR	FALSE	12	Q9Y2R2	NA_NA_NA_NA_NA_NA_NA_NA_NA_NA_NA_NA_NA_NA	0
31	521.643	3	-0.000111262	RRYQKSTELLIR	FALSE	12	P68431	NA_NA_NA_NA_NA_NA_NA_NA_NA_NA_NA_NA_NA_NA	0
32	545.816	2	-0.00104738	TRIEGLLAAF	FALSE	10	P48444	NA_NA_NA_NA_NA_NA_NA_NA_NA_NA_NA_NA	0
33	486.276	2	0.00181962	SEVNIPLSL	FALSE	9	O75175	NA_NA_NA_NA_NA_NA_NA_NA_NA_NA_NA	0
34	547.82	2	-0.00012138	HRLGIEGLSL	FALSE	10	Q9NYU2	NA_NA_NA_NA_NA_NA_NA_NA_NA_NA_NA_NA	0
35	359.959	4	7.07906e-05	GRFNDIHVPIRL	FALSE	12	Q9NTI5	NA_NA_NA_NA_NA_NA_NA_NA_NA_NA_NA_NA_NA_NA	0
36	729.395	2	-0.00175588	KRWQNEKLGLDA	FALSE	12	P11912	NA_NA_NA_NA_NA_NA_NA_NA_NA_NA_NA_NA_NA_NA	0
37	654.285	2	-0.00342488	SRWDETPASQM	FALSE	11	O75533	NA_NA_NA_NA_NA_NA_NA_NA_NA_NA_NA_NA_NA	0
38	721.436	2	-0.00463188	KRLDEKLGILEK	FALSE	12	Q9Y520	NA_NA_NA_NA_NA_NA_NA_NA_NA_NA_NA_NA_NA_NA	0
39	473.618	3	0.000208404	KRLITDSYPVVK	FALSE	12	Q9HCU8	NA_NA_NA_NA_NA_NA_NA_NA_NA_NA_NA_NA_NA_NA	0
40	460.764	2	0.000116617	LALSPVPSH	FALSE	9	P40259	NA_NA_NA_NA_NA_NA_NA_NA_NA_NA_NA	0
41	597.84	2	-0.00317338	ARHNLIINIM	FALSE	10	O43556	NA_NA_NA_NA_NA_NA_NA_NA_NA_NA_NA_NA	0
42	599.845	2	-0.00390988	ASRLLLNNGAK	FALSE	11	P15121	Ac_NA_NA_NA_NA_NA_NA_NA_NA_NA_NA_NA_NA	0
43	444.253	3	-0.00227693	GRIMLKGDNITL	FALSE	12	P62304	NA_NA_NA_NA_NA_NA_NA_NA_NA_NA_NA_NA_NA_NA	0
44	645.844	2	-0.000223881	SRWESSNKALL	FALSE	11	P40222	NA_NA_NA_NA_NA_NA_NA_NA_NA_NA_NA_NA_NA	0
45	356.455	4	0.000383296	GRFNDIHVPVRL	FALSE	12	Q29RF7	NA_NA_NA_NA_NA_NA_NA_NA_NA_NA_NA_NA_NA_NA	0
46	616.353	2	-0.00152488	SRLQETGLLSK	FALSE	11	Q9UQL6	NA_NA_NA_NA_NA_NA_NA_NA_NA_NA_NA_NA_NA	0
47	595.747	2	-0.00143538	ARFCDSSGNSF	FALSE	11	Q9H977	NA_NA_NA_NA_NA_NA_NA_NA_NA_NA_NA_NA_NA	0
48	700.418	2	4.36206e-05	NRIDISQLVITK	FALSE	12	P28340	NA_NA_NA_NA_NA_NA_NA_NA_NA_NA_NA_NA_NA_NA	0
49	600.343	2	0.000170124	LAVQGDWLLGK	FALSE	11	H0YDR8	NA_NA_NA_NA_NA_NA_NA_NA_NA_NA_NA_NA_NA	0
50	413.251	3	-0.000643596	GRLPQGIVREL	FALSE	11	P63272	NA_NA_NA_NA_NA_NA_NA_NA_NA_NA_NA_NA_NA	0
51	641.85	2	0.00109012	GRFTGLESIFR	FALSE	11	Q8N4Q0	NA_NA_NA_NA_NA_NA_NA_NA_NA_NA_NA_NA_NA	0
52	649.364	2	-0.00343588	KRAFIITGQTY	FALSE	11	P30566	NA_NA_NA_NA_NA_NA_NA_NA_NA_NA_NA_NA_NA	0
53	793.867	2	-0.00208338	MRYFPGADEPLQY	FALSE	13	O43318	NA_NA_NA_NA_NA_NA_NA_NA_NA_NA_NA_NA_NA_NA_NA	0
54	462.948	3	-0.00127559	RRIGLENFLLR	FALSE	11	O95219	NA_NA_NA_NA_NA_NA_NA_NA_NA_NA_NA_NA_NA	0
55	758.907	2	0.00282062	VVFDDSEPVQRIL	FALSE	13	Q9UN86	NA_NA_NA_NA_NA_NA_NA_NA_NA_NA_NA_NA_NA_NA_NA	0
56	601.318	2	-0.00238638	ARFDPQGGLAGI	FALSE	12	P06340	NA_NA_NA_NA_NA_NA_NA_NA_NA_NA_NA_NA_NA_NA	0
58	480.232	3	0.00162074	RRFDDAVVQSDM	FALSE	12	P11142	NA_NA_NA_NA_NA_NA_NA_NA_NA_NA_NA_NA_NA_NA	0
59	607.347	2	-0.00204338	QRLEQLVEAK	FALSE	10	Q9H2L5	NA_NA_NA_NA_NA_NA_NA_NA_NA_NA_NA_NA	0
60	655.919	2	0.00127262	KRIQDIVGILR	FALSE	11	P46087	NA_NA_NA_NA_NA_NA_NA_NA_NA_NA_NA_NA_NA	0
61	764.897	2	0.00278512	KRFGFPEGSVELY	FALSE	13	P23396	NA_NA_NA_NA_NA_NA_NA_NA_NA_NA_NA_NA_NA_NA_NA	0
62	595.326	2	0.00151762	MRLPGGPTLTF	FALSE	11	Q9NQ55	NA_NA_NA_NA_NA_NA_NA_NA_NA_NA_NA_NA_NA	0
63	493.787	2	0.00105312	SRNEALIAL	FALSE	9	Q14651	NA_NA_NA_NA_NA_NA_NA_NA_NA_NA_NA	0
64	481.769	2	-0.000565884	AQATISFPK	FALSE	9	Q99741	NA_NA_NA_NA_NA_NA_NA_NA_NA_NA_NA	0.0011
65	491.315	2	0.00112512	LRNPLIAGK	FALSE	9	P62316	NA_NA_NA_NA_NA_NA_NA_NA_NA_NA_NA	0.0011
66	565.277	3	-0.00201559	YRWTEYGLTFTEK	FALSE	13	P21796	NA_NA_NA_NA_NA_NA_NA_NA_NA_NA_NA_NA_NA_NA_NA	0.0011
67	425.227	3	0.000114073	GRLSNISHLNY	FALSE	11	Q9NY97	NA_NA_NA_NA_NA_NA_NA_NA_NA_NA_NA_NA_NA	0.0011
68	516.797	2	0.000584616	GRVALADIAF	FALSE	10	Q9Y2X0	NA_NA_NA_NA_NA_NA_NA_NA_NA_NA_NA_NA	0.0011
70	715.389	2	-0.00558088	VRFSPNSSNPIIV	FALSE	13	P63244	NA_NA_NA_NA_NA_NA_NA_NA_NA_NA_NA_NA_NA_NA_NA	0.0011
71	500.275	2	-0.00225488	QRSDIATLL	FALSE	9	Q9Y4E8	pyrGlu_NA_NA_NA_NA_NA_NA_NA_NA_NA_NA	0.0011
72	594.785	2	-0.00127488	TRFSSQSNVY	FALSE	10	Q9Y664	NA_NA_NA_NA_NA_NA_NA_NA_NA_NA_NA_NA	0.0011
73	651.373	2	0.00219012	ARNPSLKQQLF	FALSE	11	P48201	NA_NA_NA_NA_NA_NA_NA_NA_NA_NA_NA_NA_NA	0.0011
74	579.844	2	-0.00243538	QRISLNTLTL	FALSE	10	O75955	NA_NA_NA_NA_NA_NA_NA_NA_NA_NA_NA_NA	0.0011
75	432.262	3	-0.000442594	RRIQDQLLPR	FALSE	10	G3V3C2	NA_NA_NA_NA_NA_NA_NA_NA_NA_NA_NA_NA	0.0011
76	527.304	2	-0.00224688	ARNDPLLVGV	FALSE	10	O60262	NA_NA_NA_NA_NA_NA_NA_NA_NA_NA_NA_NA	0.0011
77	522.319	2	-0.000688376	GRLTSQLLR	FALSE	9	Q9NWT8	NA_NA_NA_NA_NA_NA_NA_NA_NA_NA_NA	0.0011
78	760.377	2	0.00207162	KRIGDELDSNMEL	FALSE	13	Q07812	NA_NA_NA_NA_NA_NA_NA_NA_NA_NA_NA_NA_NA_NA_NA	0.0011
79	440.574	3	-0.000374599	GRFEGDTGLIVR	FALSE	12	O00267	NA_NA_NA_NA_NA_NA_NA_NA_NA_NA_NA_NA_NA_NA	0.0011
80	549.328	2	-0.000868384	MRVPAQLLGL	FALSE	10	P04431	NA_NA_NA_NA_NA_NA_NA_NA_NA_NA_NA_NA	0.0011
81	691.391	2	-0.00539238	SRVKFSPSLTLF	FALSE	12	Q9Y2X0	NA_NA_NA_NA_NA_NA_NA_NA_NA_NA_NA_NA_NA_NA	0.0011
82	548.266	2	-0.000264882	ARVYLNGDGM	FALSE	10	Q13114	NA_NA_NA_NA_NA_NA_NA_NA_NA_NA_NA_NA	0.0011
83	649.819	2	0.00215862	TEQAISFAKDF	FALSE	11	P12236	Ac_NA_NA_NA_NA_NA_NA_NA_NA_NA_NA_NA_NA	0.001
85	512.338	2	0.000349619	RQVIPIIGK	FALSE	9	Q96RU3	NA_NA_NA_NA_NA_NA_NA_NA_NA_NA_NA	0.0009
86	704.918	2	0.00338062	YLGQVAILLFKSG	FALSE	13	P63167	NA_NA_NA_NA_NA_NA_NA_NA_NA_NA_NA_NA_NA_NA_NA	0.0009
87	515.804	2	-0.00238238	SRWLGLLSV	FALSE	9	P30405	NA_NA_NA_NA_NA_NA_NA_NA_NA_NA_NA	0.0009
88	490.599	3	-0.00323593	KRLELGNLGNPQM	FALSE	13	Q13415	NA_NA_NA_NA_NA_NA_NA_NA_NA_NA_NA_NA_NA_NA_NA	0.0009
89	656.369	2	0.00176812	ASVSTVLTSKYR	FALSE	12	P69905	NA_NA_NA_NA_NA_NA_NA_NA_NA_NA_NA_NA_NA_NA	0.0009
90	557.834	2	0.00127162	SRIIGVDINK	FALSE	10	P11766	NA_NA_NA_NA_NA_NA_NA_NA_NA_NA_NA_NA	0.0009
91	777.861	2	0.00307412	LNETGDEPFQYKN	FALSE	13	P15104	NA_NA_NA_NA_NA_NA_NA_NA_NA_NA_NA_NA_NA_NA_NA	0.0009
92	545.755	2	0.00180962	SRMLSGGFGY	FALSE	10	Q15773	NA_NA_NA_MetOX_NA_NA_NA_NA_NA_NA_NA_NA	0.0009
93	601.838	2	-0.00335038	QRTDVLTGLSI	FALSE	11	Q6SPF0	NA_NA_NA_NA_NA_NA_NA_NA_NA_NA_NA_NA_NA	0.0009
94	515.805	2	-0.000982377	FRNIPGITL	FALSE	9	P36578	NA_NA_NA_NA_NA_NA_NA_NA_NA_NA_NA	0.0009
95	542.825	2	-0.00254688	GRLQQVLTGL	FALSE	10	Q9BTW9	NA_NA_NA_NA_NA_NA_NA_NA_NA_NA_NA_NA	0.0009
96	494.774	2	-0.00107938	GRVSLEGGTL	FALSE	10	Q9NRU3	NA_NA_NA_NA_NA_NA_NA_NA_NA_NA_NA_NA	0.0009
98	601.271	2	0.00119512	AANMYRVGDY	FALSE	10	O94776	Ac_NA_NA_NA_NA_NA_NA_NA_NA_NA_NA_NA	0.0009
100	741.377	2	-0.00236438	ARFQQGKDLQQY	FALSE	12	Q63HN8	NA_NA_NA_NA_NA_NA_NA_NA_NA_NA_NA_NA_NA_NA	0.0009
101	453.597	3	-0.000378264	SRLNLNNTVLSK	FALSE	12	P07814	NA_NA_NA_NA_NA_NA_NA_NA_NA_NA_NA_NA_NA_NA	0.0009
102	595.342	2	0.00151012	FRLFPVPGSGL	FALSE	11	P13473	NA_NA_NA_NA_NA_NA_NA_NA_NA_NA_NA_NA_NA	0.0009
103	631.279	2	-0.00255388	SRMDVTSCISY	FALSE	11	Q9Y6Y0	NA_NA_NA_NA_NA_NA_NA_NA_NA_NA_NA_NA_NA	0.0009
104	653.843	2	-0.000193878	GRLLWEQELY	FALSE	10	P42768	NA_NA_NA_NA_NA_NA_NA_NA_NA_NA_NA_NA	0.0009
105	611.78	2	-0.00254738	YRNFMIDTY	FALSE	9	Q8TAQ2;Q92922	NA_NA_NA_NA_NA_NA_NA_NA_NA_NA_NA	0.0009
106	362.907	3	7.47372e-05	LRVTPFILK	FALSE	9	Q8N4H5	NA_NA_NA_NA_NA_NA_NA_NA_NA_NA_NA	0.0009
107	613.813	2	0.00020762	SRFSLENNFL	FALSE	10	P42224	NA_NA_NA_NA_NA_NA_NA_NA_NA_NA_NA_NA	0.0009
108	593.855	2	0.00189262	LRVDQIIMAK	FALSE	10	P50990	NA_NA_NA_NA_NA_NA_NA_NA_NA_NA_NA_NA	0.0009
109	439.938	3	-0.00057693	QRIEHLIGKKL	FALSE	11	Q9H0S4	pyrGlu_NA_NA_NA_NA_NA_NA_NA_NA_NA_NA_NA_NA	0.0009
110	681.865	2	0.00218262	HRYPTSIASLAF	FALSE	12	O43684	NA_NA_NA_NA_NA_NA_NA_NA_NA_NA_NA_NA_NA_NA	0.0009
111	563.816	2	-0.00114738	TRISIFGLGY	FALSE	10	Q92508	NA_NA_NA_NA_NA_NA_NA_NA_NA_NA_NA_NA	0.0009
112	464.557	3	-0.0006066	HRWDAADDIHR	FALSE	11	Q9HD15	NA_NA_NA_NA_NA_NA_NA_NA_NA_NA_NA_NA_NA	0.0008
113	603.788	2	-0.00554338	SRMDGEGQLTL	FALSE	11	Q86WA8	NA_NA_NA_NA_NA_NA_NA_NA_NA_NA_NA_NA_NA	0.0008
114	428.899	3	0.000218738	RRISGVDRYY	FALSE	10	O15239	NA_NA_NA_NA_NA_NA_NA_NA_NA_NA_NA_NA	0.0008
115	420.604	3	0.000183069	RQLSVLFRKL	FALSE	10	Q96HR3	NA_NA_NA_NA_NA_NA_NA_NA_NA_NA_NA_NA	0.0008
116	479.787	2	-0.00108988	GRIATLASGL	FALSE	10	P05023	NA_NA_NA_NA_NA_NA_NA_NA_NA_NA_NA_NA	0.0008
117	515.326	2	0.00086062	GRILSGVVTK	FALSE	10	P62280	NA_NA_NA_NA_NA_NA_NA_NA_NA_NA_NA_NA	0.0008
118	572.838	2	-0.00232288	ARLLLPVAEY	FALSE	10	O00541	NA_NA_NA_NA_NA_NA_NA_NA_NA_NA_NA_NA	0.0008
119	508.252	2	-0.00145738	GRAPISNPGM	FALSE	10	P15927	NA_NA_NA_NA_NA_NA_NA_NA_NA_NA_MetOX_NA	0.0008
120	557.77	2	-0.00138338	GRYDGLVGMF	FALSE	10	P12081	NA_NA_NA_NA_NA_NA_NA_NA_NA_NA_NA_NA	0.0008
121	350.451	4	-0.000908451	TRYIASLKQRY	FALSE	11	O14818	NA_NA_NA_NA_NA_NA_NA_NA_NA_NA_NA_NA_NA	0.0008
123	661.296	2	-0.00256238	YRFGEMQLDF	FALSE	10	Q8TCJ2	NA_NA_NA_NA_NA_NA_MetOX_NA_NA_NA_NA_NA	0.0008
124	372.879	3	7.04077e-05	GRIMLKGDNI	FALSE	10	P62304	NA_NA_NA_NA_NA_NA_NA_NA_NA_NA_NA_NA	0.0008
125	592.342	2	-0.00155988	VRLLLNNDNL	FALSE	10	P47755	NA_NA_NA_NA_NA_NA_NA_NA_NA_NA_NA_NA	0.0008
126	508.811	2	0.00167812	TRLLAQTTL	FALSE	9	P27105	NA_NA_NA_NA_NA_NA_NA_NA_NA_NA_NA	0.0008
127	662.335	2	-0.00427488	WRLGSSDILNY	FALSE	11	O14530	NA_NA_NA_NA_NA_NA_NA_NA_NA_NA_NA_NA_NA	0.0008
128	463.775	2	-0.000282876	ARAVPVGSGL	FALSE	10	S4R3C5	NA_NA_NA_NA_NA_NA_NA_NA_NA_NA_NA_NA	0.0008
129	477.942	3	0.000101739	GRWPKKSAEFLL	FALSE	12	P18621	NA_NA_NA_NA_NA_NA_NA_NA_NA_NA_NA_NA_NA_NA	0.0008
130	494.748	2	0.00107762	GRWEAAEGL	FALSE	9	O14579	NA_NA_NA_NA_NA_NA_NA_NA_NA_NA_NA	0.0008
131	527.297	2	0.00041812	HRLPPVTSF	FALSE	9	Q9Y2X9	NA_NA_NA_NA_NA_NA_NA_NA_NA_NA_NA	0.0008
132	356.563	3	-0.000170263	VRWPGVKLL	FALSE	9	O60763	NA_NA_NA_NA_NA_NA_NA_NA_NA_NA_NA	0.0008
134	681.329	2	0.000192616	ARYVFQSENTF	FALSE	11	Q9UMX1	NA_NA_NA_NA_NA_NA_NA_NA_NA_NA_NA_NA_NA	0.0008
135	542.345	2	-0.00321488	ARAVVTGLLAL	FALSE	11	Q9BVK8	NA_NA_NA_NA_NA_NA_NA_NA_NA_NA_NA_NA_NA	0.0008
136	350.716	4	0.000200795	KRLDLDAAKTRL	FALSE	12	Q9Y371	NA_NA_NA_NA_NA_NA_NA_NA_NA_NA_NA_NA_NA_NA	0.0008
137	472.282	2	0.00487612	LKDDAVALV	FALSE	9	O15254	NA_NA_NA_NA_NA_NA_NA_NA_NA_NA_NA	0.0014
138	660.832	2	-0.00419638	ARMLITEENLM	FALSE	11	Q8IWV8	NA_NA_NA_NA_NA_NA_NA_NA_NA_NA_NA_NA_NA	0.0013
139	638.842	2	-0.00162838	QRFQLPGNIGF	FALSE	11	Q9H3L0	NA_NA_NA_NA_NA_NA_NA_NA_NA_NA_NA_NA_NA	0.0012
140	480.594	3	0.000753739	KRYSPDELRYL	FALSE	11	Q8WUB8	NA_NA_NA_NA_NA_NA_NA_NA_NA_NA_NA_NA_NA	0.0012
141	679.347	2	-0.00372838	KRISEQFTAMF	FALSE	11	Q13509	NA_NA_NA_NA_NA_NA_NA_NA_NA_NA_NA_NA_NA	0.0012
142	713.908	2	0.000675124	KRFDDKYTLKL	FALSE	11	Q15005	NA_NA_NA_NA_NA_NA_NA_NA_NA_NA_NA_NA_NA	0.0012
143	738.88	2	-0.00536688	GRFDITIGPKQNM	FALSE	13	Q9Y2T2	NA_NA_NA_NA_NA_NA_NA_NA_NA_NA_NA_NA_NA_NA_NA	0.0012
144	437.919	3	-0.000482261	QRFTIDKYLK	FALSE	10	O95163	NA_NA_NA_NA_NA_NA_NA_NA_NA_NA_NA_NA	0.0012
145	563.303	2	-0.00223538	QRDDILINR	FALSE	9	Q8TED0	pyrGlu_NA_NA_NA_NA_NA_NA_NA_NA_NA_NA	0.0012
146	421.557	3	0.000667404	GRYDPSVKPPF	FALSE	11	Q8N4Q0	NA_NA_NA_NA_NA_NA_NA_NA_NA_NA_NA_NA_NA	0.0012
147	704.851	2	-0.00517838	ARLDHKFDLMY	FALSE	11	P68363	NA_NA_NA_NA_NA_NA_NA_NA_NA_NA_NA_NA_NA	0.0012
148	638.835	2	0.00180562	VRFYIESISY	FALSE	10	Q9P2Q2	NA_NA_NA_NA_NA_NA_NA_NA_NA_NA_NA_NA	0.0012
150	586.345	2	0.000639118	SRIQQIIEGK	FALSE	10	O60313	NA_NA_NA_NA_NA_NA_NA_NA_NA_NA_NA_NA	0.0012
151	487.29	3	9.03985e-05	ARWLPLGLGLNHL	FALSE	13	Q13200	NA_NA_NA_NA_NA_NA_NA_NA_NA_NA_NA_NA_NA_NA_NA	0.0012
152	653.862	2	-0.000186879	YRYLPPATQVV	FALSE	11	P38919	NA_NA_NA_NA_NA_NA_NA_NA_NA_NA_NA_NA_NA	0.0012
153	499.792	2	-0.00157538	SRWGPLIGL	FALSE	9	Q9BRK5	NA_NA_NA_NA_NA_NA_NA_NA_NA_NA_NA	0.0012
154	586.31	2	0.000513123	ARLSAIYGGTY	FALSE	11	P31150	NA_NA_NA_NA_NA_NA_NA_NA_NA_NA_NA_NA_NA	0.0012
155	673.805	2	-0.00145038	SRYDPSISFSGM	FALSE	12	Q9Y4K1	NA_NA_NA_NA_NA_NA_NA_NA_NA_NA_NA_NA_NA_NA	0.0012
156	721.433	2	0.00124712	KRVTIMPKDIQL	FALSE	12	P68431	NA_NA_NA_NA_NA_NA_NA_NA_NA_NA_NA_NA_NA_NA	0.0012
157	625.801	2	-0.00261388	NRMEPLWTGF	FALSE	10	Q96GQ5	NA_NA_NA_NA_NA_NA_NA_NA_NA_NA_NA_NA	0.0012
159	462.621	3	0.00133307	NRFAWPKILKI	FALSE	11	O43491	NA_NA_NA_NA_NA_NA_NA_NA_NA_NA_NA_NA_NA	0.0012
160	541.279	2	0.00164162	QRFPLSFGF	FALSE	9	Q92611	pyrGlu_NA_NA_NA_NA_NA_NA_NA_NA_NA_NA	0.0012
161	524.29	2	-0.00119988	LRWLGANAF	FALSE	9	P08236	NA_NA_NA_NA_NA_NA_NA_NA_NA_NA_NA	0.0012
162	478.909	3	-0.000328266	RRMGESDDSILR	FALSE	12	P63220	NA_NA_NA_NA_NA_NA_NA_NA_NA_NA_NA_NA_NA_NA	0.0012
163	639.343	2	-0.00400038	QRIGLSSQELF	FALSE	11	P62324	NA_NA_NA_NA_NA_NA_NA_NA_NA_NA_NA_NA_NA	0.0012
164	543.817	2	-0.00199038	VRAIPVDIGF	FALSE	10	Q66K14	NA_NA_NA_NA_NA_NA_NA_NA_NA_NA_NA_NA	0.0012
165	518.25	2	-0.00213388	SAQGSDVSLTA	FALSE	11	P03989	NA_NA_NA_NA_NA_NA_NA_NA_NA_NA_NA_NA_NA	0.0012
166	481.921	3	0.000411405	IRMMITSQDVLH	FALSE	12	P00403	NA_NA_NA_NA_NA_NA_NA_NA_NA_NA_NA_NA_NA_NA	0.0012
167	448.236	3	1.80702e-05	ARFDPYGKNKF	FALSE	11	Q9P021	NA_NA_NA_NA_NA_NA_NA_NA_NA_NA_NA_NA_NA	0.0012
168	485.291	2	-0.00478238	QRALLANAL	FALSE	9	P57088	NA_NA_NA_NA_NA_NA_NA_NA_NA_NA_NA	0.0012
169	442.737	2	-0.000511882	HACGVIATI	FALSE	9	O95807	NA_NA_NA_NA_NA_NA_NA_NA_NA_NA_NA	0.0011
170	521.313	2	0.00093662	LRLEAGLNR	FALSE	9	P63218	NA_NA_NA_NA_NA_NA_NA_NA_NA_NA_NA	0.0011
172	553.302	2	-0.00210388	ARNEYLLNL	FALSE	9	Q86WN1	NA_NA_NA_NA_NA_NA_NA_NA_NA_NA_NA	0.0011
173	632.836	2	-0.00201088	YRVTLNPPGTF	FALSE	11	Q86Y39	NA_NA_NA_NA_NA_NA_NA_NA_NA_NA_NA_NA_NA	0.0011
174	477.791	2	-0.000132884	ARTPAALAAL	FALSE	10	Q9UQ35	NA_NA_NA_NA_NA_NA_NA_NA_NA_NA_NA_NA	0.0011
175	449.282	3	-0.000643598	VRLLLPGELAKH	FALSE	12	Q96A08	NA_NA_NA_NA_NA_NA_NA_NA_NA_NA_NA_NA_NA_NA	0.0011
176	451.238	3	-0.000591929	LRWIGDKEATY	FALSE	11	P31350	NA_NA_NA_NA_NA_NA_NA_NA_NA_NA_NA_NA_NA	0.0011
177	546.777	2	-0.00122238	GRLEGWEVF	FALSE	9	Q86Y39	NA_NA_NA_NA_NA_NA_NA_NA_NA_NA_NA	0.0011
178	502.781	2	0.000835123	SRLPSLGAGF	FALSE	10	Q8IZL8	NA_NA_NA_NA_NA_NA_NA_NA_NA_NA_NA_NA	0.0011
179	443.273	3	-0.000536263	ERIKLEGIITR	FALSE	11	Q9UQE7	NA_NA_NA_NA_NA_NA_NA_NA_NA_NA_NA_NA_NA	0.0011
180	429.227	3	0.000447404	RRFPPYYMR	FALSE	9	P67809	NA_NA_NA_NA_NA_NA_NA_NA_NA_NA_NA	0.0011
181	566.318	2	0.000553616	GRVGDVYIPR	FALSE	10	Q9BRL6	NA_NA_NA_NA_NA_NA_NA_NA_NA_NA_NA_NA	0.0011
182	454.237	3	0.00174107	TRFLAEEGFYK	FALSE	11	P46977	NA_NA_NA_NA_NA_NA_NA_NA_NA_NA_NA_NA_NA	0.0011
183	357.901	3	-5.12679e-05	ARLLASKSLL	FALSE	10	P43308	NA_NA_NA_NA_NA_NA_NA_NA_NA_NA_NA_NA	0.001
184	449.611	3	0.000651069	GRIAVAVVKGLTY	FALSE	13	Q13163	NA_NA_NA_NA_NA_NA_NA_NA_NA_NA_NA_NA_NA_NA_NA	0.001
185	519.789	2	-0.00123288	ARFVNVLGY	FALSE	9	Q8TAP6	NA_NA_NA_NA_NA_NA_NA_NA_NA_NA_NA	0.001
186	551.817	2	-0.00203288	QRLLVTELM	FALSE	9	Q9H6D7	NA_NA_NA_NA_NA_NA_NA_NA_NA_NA_NA	0.001
187	357.229	3	-0.000568268	GRVDVVKALL	FALSE	10	Q63ZY3	NA_NA_NA_NA_NA_NA_NA_NA_NA_NA_NA_NA	0.001
188	651.846	2	0.00254412	ASEDIAKLAETL	FALSE	12	P46060	Ac_NA_NA_NA_NA_NA_NA_NA_NA_NA_NA_NA_NA_NA	0.001
189	374.557	3	-0.000166265	RRFTTSVVR	FALSE	9	P15954	NA_NA_NA_NA_NA_NA_NA_NA_NA_NA_NA	0.001
190	475.258	2	-0.00136488	SRIPVSSGF	FALSE	9	Q9BYI3	NA_NA_NA_NA_NA_NA_NA_NA_NA_NA_NA	0.001
191	710.324	2	-0.00259888	WQWNPSDRPSF	FALSE	11	P00519	NA_NA_NA_NA_NA_NA_NA_NA_NA_NA_NA_NA_NA	0.001
192	563.304	2	-0.00254688	GRVKLSDFGF	FALSE	10	Q9NQU5	NA_NA_NA_NA_NA_NA_NA_NA_NA_NA_NA_NA	0.001
193	541.293	2	-0.000539882	QRNLYIAGF	FALSE	9	P51572	NA_NA_NA_NA_NA_NA_NA_NA_NA_NA_NA	0.001
195	455.267	3	-0.00039326	HRFVSVSKLKY	FALSE	11	O95070	NA_NA_NA_NA_NA_NA_NA_NA_NA_NA_NA_NA_NA	0.001
196	647.343	2	-0.000857883	SRYEQVDLVGK	FALSE	11	Q9BQ39	NA_NA_NA_NA_NA_NA_NA_NA_NA_NA_NA_NA_NA	0.001
197	581.316	2	-0.00131188	GRVQVEDIVF	FALSE	10	Q15543	NA_NA_NA_NA_NA_NA_NA_NA_NA_NA_NA_NA	0.001
198	537.327	2	-0.000282377	ARVFLQNLL	FALSE	9	P16930	NA_NA_NA_NA_NA_NA_NA_NA_NA_NA_NA	0.001
199	417.594	3	0.000558408	SRVYLLMKKL	FALSE	10	P52434	NA_NA_NA_NA_NA_NA_NA_NA_NA_NA_NA_NA	0.001
200	526.296	3	0.0023804	RRFSPIPFPPLSY	FALSE	13	Q6P2Q9	NA_NA_NA_NA_NA_NA_NA_NA_NA_NA_NA_NA_NA_NA_NA	0.001
201	529.785	2	-0.00273288	SRLQIDPVM	FALSE	9	Q6PJT7	NA_NA_NA_NA_NA_NA_NA_NA_NA_NA_NA	0.001
202	506.29	2	-0.00110038	ARLPWAGQL	FALSE	9	Q96AQ6	NA_NA_NA_NA_NA_NA_NA_NA_NA_NA_NA	0.0009
203	544.814	2	-0.000938875	SRFPEALRL	FALSE	9	Q13200	NA_NA_NA_NA_NA_NA_NA_NA_NA_NA_NA	0.0009
204	626.821	2	0.000481119	ARFSPDGQYLV	FALSE	11	Q2TAY7	NA_NA_NA_NA_NA_NA_NA_NA_NA_NA_NA_NA_NA	0.0009
205	481.779	2	-0.00139938	GRFSGLLGR	FALSE	9	Q14005	NA_NA_NA_NA_NA_NA_NA_NA_NA_NA_NA	0.0009
206	503.771	2	0.000502618	SRAVQEFGL	FALSE	9	Q9Y255	NA_NA_NA_NA_NA_NA_NA_NA_NA_NA_NA	0.0009
207	458.578	3	0.000304067	HRLKNDDSLLY	FALSE	11	O14647	NA_NA_NA_NA_NA_NA_NA_NA_NA_NA_NA_NA_NA	0.0009
208	703.339	2	0.00213312	YRNEFTAWYR	FALSE	10	A0A087WZV9	NA_NA_NA_NA_NA_NA_NA_NA_NA_NA_NA_NA	0.0009
209	479.777	2	-0.000525882	QRLPVGAAF	FALSE	9	Q96EH3	NA_NA_NA_NA_NA_NA_NA_NA_NA_NA_NA	0.0009
210	603.791	2	-0.000958383	ARIASPEGQDY	FALSE	11	Q9Y3I0	NA_NA_NA_NA_NA_NA_NA_NA_NA_NA_NA_NA_NA	0.0009
211	454.59	3	-0.0003246	KRNEFLGELQK	FALSE	11	Q14141	NA_NA_NA_NA_NA_NA_NA_NA_NA_NA_NA_NA_NA	0.0009
212	501.789	2	-0.00143288	QRFASIVAK	FALSE	9	A3KN83	pyrGlu_NA_NA_NA_NA_NA_NA_NA_NA_NA_NA	0.0009
213	364.203	3	0.000475733	GRFAGWGRAL	FALSE	10	Q86YV0	NA_NA_NA_NA_NA_NA_NA_NA_NA_NA_NA_NA	0.0009
215	597.309	2	-0.00157538	VRMPPFTQAF	FALSE	10	Q6ZS81	NA_NA_NA_NA_NA_NA_NA_NA_NA_NA_NA_NA	0.0009
216	555.783	2	-0.00139038	YRTDMIQAL	FALSE	9	Q6P2Q9	NA_NA_NA_NA_NA_NA_NA_NA_NA_NA_NA	0.0009
217	604.831	2	0.000379117	KRFQQAGFNL	FALSE	10	Q9Y5T5	NA_NA_NA_NA_NA_NA_NA_NA_NA_NA_NA_NA	0.0009
218	369.229	3	-0.000468267	ISLKQAPLVH	FALSE	10	P09496	NA_NA_NA_NA_NA_NA_NA_NA_NA_NA_NA_NA	0.0009
219	548.34	2	0.00244962	ARWLPLGLGL	FALSE	10	Q13200	NA_NA_NA_NA_NA_NA_NA_NA_NA_NA_NA_NA	0.0009
220	555.837	2	0.000828116	GRIPEQILGK	FALSE	10	Q02750	NA_NA_NA_NA_NA_NA_NA_NA_NA_NA_NA_NA	0.0009
221	551.308	2	-0.000932877	ARMLIAQEGL	FALSE	10	P35520	NA_NA_NA_NA_NA_NA_NA_NA_NA_NA_NA_NA	0.0009
222	551.803	2	-0.00275688	MRANIQAVSL	FALSE	10	O43633	NA_NA_NA_NA_NA_NA_NA_NA_NA_NA_NA_NA	0.0009
223	528.309	2	0.000445116	TRDPLVIEL	FALSE	9	Q9NYL4	NA_NA_NA_NA_NA_NA_NA_NA_NA_NA_NA	0.0009
224	656.358	2	0.000632125	KRFKVSDEVGF	FALSE	11	Q6VY07	NA_NA_NA_NA_NA_NA_NA_NA_NA_NA_NA_NA_NA	0.0009
225	538.252	2	-0.00135688	SRWPECNAL	FALSE	9	Q14CX7	NA_NA_NA_NA_NA_NA_NA_NA_NA_NA_NA	0.0009
226	552.761	2	-0.000615375	GRMEGPPPTY	FALSE	10	O15165	NA_NA_NA_NA_NA_NA_NA_NA_NA_NA_NA_NA	0.0009
227	527.773	2	0.000917115	LRFQSSAVM	FALSE	9	P68431	NA_NA_NA_NA_NA_NA_NA_NA_NA_MetOX_NA	0.0009
228	469.931	3	0.00123007	HQILPKEQWTK	FALSE	11	P14927	NA_NA_NA_NA_NA_NA_NA_NA_NA_NA_NA_NA_NA	0.0009
229	379.875	3	-0.000296599	ARISMADVKF	FALSE	10	Q13418	NA_NA_NA_NA_NA_NA_NA_NA_NA_NA_NA_NA	0.0009
230	468.235	3	-0.000582258	YRFVQGKDWGF	FALSE	11	Q6IQ16	NA_NA_NA_NA_NA_NA_NA_NA_NA_NA_NA_NA_NA	0.0009
231	505.749	2	-0.000661379	GRADGISSTF	FALSE	10	P13612	NA_NA_NA_NA_NA_NA_NA_NA_NA_NA_NA_NA	0.0009
232	591.79	2	0.00137912	SRHSGPFFTF	FALSE	10	P25686	NA_NA_NA_NA_NA_NA_NA_NA_NA_NA_NA_NA	0.0009
233	395.579	3	-0.00087093	RRSSIPITVR	FALSE	10	P33992	NA_NA_NA_NA_NA_NA_NA_NA_NA_NA_NA_NA	0.0009
235	603.331	2	0.000180616	ARLDELGGVYL	FALSE	11	P04844	NA_NA_NA_NA_NA_NA_NA_NA_NA_NA_NA_NA_NA	0.0009
236	627.795	2	-0.00398588	GRWGPTFPSSY	FALSE	11	Q96HJ3	NA_NA_NA_NA_NA_NA_NA_NA_NA_NA_NA_NA_NA	0.0009
237	576.808	2	0.00132012	LQTRFPLDY	FALSE	9	Q14157	NA_NA_NA_NA_NA_NA_NA_NA_NA_NA_NA	0.0009
238	705.933	2	0.000222616	KRLKVPPAINQF	FALSE	12	P62424	NA_NA_NA_NA_NA_NA_NA_NA_NA_NA_NA_NA_NA_NA	0.0009
239	488.301	2	-0.00197588	LRFGVLTGL	FALSE	9	Q8WVC6	NA_NA_NA_NA_NA_NA_NA_NA_NA_NA_NA	0.0009
240	549.289	2	-0.00209688	QRNLYISGF	FALSE	9	Q9UHQ4	NA_NA_NA_NA_NA_NA_NA_NA_NA_NA_NA	0.0009
242	745.334	2	-0.00127188	TRYTPEQDTMTF	FALSE	12	P10276	NA_NA_NA_NA_NA_NA_NA_NA_NA_NA_NA_NA_NA_NA	0.0014
243	521.804	2	-0.00228288	LRLPPQATF	FALSE	9	Q96L08	NA_NA_NA_NA_NA_NA_NA_NA_NA_NA_NA	0.0014
244	567.318	2	-0.00205488	ARLAQLLEGY	FALSE	10	O94966	NA_NA_NA_NA_NA_NA_NA_NA_NA_NA_NA_NA	0.0014
245	517.256	2	-0.000953881	GRFPDGTNGL	FALSE	10	Q99967	NA_NA_NA_NA_NA_NA_NA_NA_NA_NA_NA_NA	0.0014
247	519.77	2	-0.00203988	GRFPGTFVGT	FALSE	10	Q9NR46	NA_NA_NA_NA_NA_NA_NA_NA_NA_NA_NA_NA	0.0014
248	381.901	3	-0.000151593	LRFPEILQK	FALSE	9	P54136	NA_NA_NA_NA_NA_NA_NA_NA_NA_NA_NA	0.0014
249	615.842	2	0.000411615	KRWWSAGGGLL	FALSE	11	Q9Y4A8	NA_NA_NA_NA_NA_NA_NA_NA_NA_NA_NA_NA_NA	0.0014
250	516.794	2	-0.00201488	ARLPLVNSY	FALSE	9	P42858	NA_NA_NA_NA_NA_NA_NA_NA_NA_NA_NA	0.0014
251	386.553	3	-0.000222268	ARWLDEVRL	FALSE	9	P29375	NA_NA_NA_NA_NA_NA_NA_NA_NA_NA_NA	0.0014
252	408.908	3	0.000135068	KRLESLGALTH	FALSE	11	A3KN83	NA_NA_NA_NA_NA_NA_NA_NA_NA_NA_NA_NA_NA	0.0014
253	572.374	2	0.00194512	LSLGSLLKLSL	FALSE	11	Q9NX78	NA_NA_NA_NA_NA_NA_NA_NA_NA_NA_NA_NA_NA	0.0014
254	489.246	3	0.00119307	RRMWPLAFGSGMG	FALSE	13	Q5TGZ0	NA_NA_NA_NA_NA_NA_NA_NA_NA_NA_NA_NA_NA_NA_NA	0.0013
255	518.286	2	-0.00106938	LRYPMAVGL	FALSE	9	Q9Y3U8	NA_NA_NA_NA_NA_MetOX_NA_NA_NA_NA_NA	0.0013
256	496.247	3	-0.00102726	HRLDLGEDYPSGK	FALSE	13	O43143	NA_NA_NA_NA_NA_NA_NA_NA_NA_NA_NA_NA_NA_NA_NA	0.0013
257	636.299	2	-0.000715883	YRLDLEGNEY	FALSE	10	Q13017	NA_NA_NA_NA_NA_NA_NA_NA_NA_NA_NA_NA	0.0013
259	414.904	3	-4.32587e-05	SRLDWPVRTL	FALSE	10	Q96J01	NA_NA_NA_NA_NA_NA_NA_NA_NA_NA_NA_NA	0.0013
261	530.283	2	-0.00278288	ARFLFTTGF	FALSE	9	Q93008	NA_NA_NA_NA_NA_NA_NA_NA_NA_NA_NA	0.0013
262	575.949	3	0.0010934	KRFHWEQDQIAHM	FALSE	13	Q9UG63	NA_NA_NA_NA_NA_NA_NA_NA_NA_NA_NA_NA_NA_NA_NA	0.0013
263	501.784	2	0.000695617	QRTDVLTGL	FALSE	9	Q6SPF0	NA_NA_NA_NA_NA_NA_NA_NA_NA_NA_NA	0.0013
264	529.814	2	-0.000704381	ARLKLSEEL	FALSE	9	P61158	NA_NA_NA_NA_NA_NA_NA_NA_NA_NA_NA	0.0013
265	459.225	3	0.000411072	GRFFQKGQGTCF	FALSE	12	Q9Y5S1	NA_NA_NA_NA_NA_NA_NA_NA_NA_NA_NA_NA_NA_NA	0.0013
266	516.604	3	0.000183732	RRMGESDDSILRL	FALSE	13	P63220	NA_NA_NA_NA_NA_NA_NA_NA_NA_NA_NA_NA_NA_NA_NA	0.0013
267	494.788	2	-0.000524882	GRIPGIYGR	FALSE	9	Q9NTJ3	NA_NA_NA_NA_NA_NA_NA_NA_NA_NA_NA	0.0013
268	734.887	2	0.00345012	FRFDPQFALTNI	FALSE	12	P01909	NA_NA_NA_NA_NA_NA_NA_NA_NA_NA_NA_NA_NA_NA	0.0013
270	453.284	3	-6.72665e-05	MRLSQLKQLLK	FALSE	11	Q96CT7	NA_NA_NA_NA_NA_NA_NA_NA_NA_NA_NA_NA_NA	0.0013
271	585.293	2	0.00140312	ASVEQFWRF	FALSE	9	O60573	NA_NA_NA_NA_NA_NA_NA_NA_NA_NA_NA	0.0013
272	571.34	2	0.00152112	GRAKELLGQGL	FALSE	11	B5ME19	NA_NA_NA_NA_NA_NA_NA_NA_NA_NA_NA_NA_NA	0.0012
273	537.291	2	-0.00198238	QRLEMNLGL	FALSE	9	Q01082	NA_NA_NA_NA_NA_NA_NA_NA_NA_NA_NA	0.0012
274	578.327	2	-0.00091088	GRIDQVNQLL	FALSE	10	P61201	NA_NA_NA_NA_NA_NA_NA_NA_NA_NA_NA_NA	0.0012
275	561.792	2	-0.00206888	QRTVITEEF	FALSE	9	Q96I24	NA_NA_NA_NA_NA_NA_NA_NA_NA_NA_NA	0.0012
276	443.611	3	0.000628733	RRNLILNLGLF	FALSE	11	Q96B49	NA_NA_NA_NA_NA_NA_NA_NA_NA_NA_NA_NA_NA	0.0012
277	524.284	2	-0.00135638	IRNISNTVM	FALSE	9	Q0VDF9	NA_NA_NA_NA_NA_NA_NA_NA_NA_NA_NA	0.0012
278	549.289	2	-0.00239738	GRYGAISGFGL	FALSE	11	Q9BT67	NA_NA_NA_NA_NA_NA_NA_NA_NA_NA_NA_NA_NA	0.0012
279	567.335	2	0.000484116	KIMKDILEK	FALSE	9	P07900	NA_NA_NA_MetOX_NA_NA_NA_NA_NA_NA_NA	0.0012
280	600.846	2	-0.000270379	GRIGVWNAVTK	FALSE	11	Q8TBC3	NA_NA_NA_NA_NA_NA_NA_NA_NA_NA_NA_NA_NA	0.0012
281	576.319	2	-0.000988377	SRLPNYFVR	FALSE	9	Q9Y4C1	NA_NA_NA_NA_NA_NA_NA_NA_NA_NA_NA	0.0012
282	465.576	3	0.00111307	MRYNEKELQAL	FALSE	11	Q9NW61	NA_NA_NA_NA_NA_NA_NA_NA_NA_NA_NA_NA_NA	0.0012
283	459.582	3	0.000470733	ARFDAGELITQR	FALSE	12	P35232	NA_NA_NA_NA_NA_NA_NA_NA_NA_NA_NA_NA_NA_NA	0.0012
284	377.562	3	0.000382401	NRLFVGSIPK	FALSE	10	O43390	NA_NA_NA_NA_NA_NA_NA_NA_NA_NA_NA_NA	0.0012
285	547.292	2	-0.00302538	GRQFLTQLM	FALSE	9	Q15459	NA_NA_NA_NA_NA_NA_NA_NA_NA_NA_NA	0.0012
286	492.817	2	0.00239212	ARLQTALLV	FALSE	9	Q9NRC6	NA_NA_NA_NA_NA_NA_NA_NA_NA_NA_NA	0.0012
287	496.778	2	-0.00206538	GRLYGLGTGV	FALSE	10	Q9UFF9	NA_NA_NA_NA_NA_NA_NA_NA_NA_NA_NA_NA	0.0012
288	594.821	2	-0.00146088	SRAHLLLTDY	FALSE	10	Q9NV64	NA_NA_NA_NA_NA_NA_NA_NA_NA_NA_NA_NA	0.0012
289	560.806	2	-0.00365388	SRFGQGSIIGV	FALSE	11	Q6PJ21	NA_NA_NA_NA_NA_NA_NA_NA_NA_NA_NA_NA_NA	0.0012
290	470.945	3	-0.000931599	SRVQPGLLQWVK	FALSE	12	Q6E0U4	NA_NA_NA_NA_NA_NA_NA_NA_NA_NA_NA_NA_NA_NA	0.0011
291	412.226	3	-0.000117928	IRFPDTVKQM	FALSE	10	Q5JPE7	NA_NA_NA_NA_NA_NA_NA_NA_NA_NA_NA_NA	0.0011
292	559.321	2	-0.00119688	GRGVIPSTLAF	FALSE	11	Q99720	NA_NA_NA_NA_NA_NA_NA_NA_NA_NA_NA_NA_NA	0.0011
293	530.316	3	0.000164406	KRFEVKKWNAVAL	FALSE	13	P62877	NA_NA_NA_NA_NA_NA_NA_NA_NA_NA_NA_NA_NA_NA_NA	0.0011
294	790.939	2	-0.00632388	KRASEEITKMLKF	FALSE	13	Q96DT6	NA_NA_NA_NA_NA_NA_NA_NA_NA_NA_NA_NA_NA_NA_NA	0.0011
295	548.284	2	0.00169712	ITVGYVDDTL	FALSE	10	P03989	NA_NA_NA_NA_NA_NA_NA_NA_NA_NA_NA_NA	0.0011
296	451.934	3	-0.000731929	SRFLKSDLFLK	FALSE	11	O43665	NA_NA_NA_NA_NA_NA_NA_NA_NA_NA_NA_NA_NA	0.0011
297	479.781	2	-0.00147338	ISLADIAQK	FALSE	9	O43242	NA_NA_NA_NA_NA_NA_NA_NA_NA_NA_NA	0.0011
298	570.384	2	-0.00143138	ARTLLAILRL	FALSE	10	P33993	NA_NA_NA_NA_NA_NA_NA_NA_NA_NA_NA_NA	0.0011
299	570.808	2	0.00152012	SRYQDILVF	FALSE	9	P19623	NA_NA_NA_NA_NA_NA_NA_NA_NA_NA_NA	0.0011
300	567.817	2	-0.000578382	GRVLLQNTSF	FALSE	10	Q9UI26	NA_NA_NA_NA_NA_NA_NA_NA_NA_NA_NA_NA	0.0011
301	521.304	2	-0.00254638	ARTSPINLGL	FALSE	10	P50616	NA_NA_NA_NA_NA_NA_NA_NA_NA_NA_NA_NA	0.0011
302	670.353	2	-0.00162438	SRFSLENNFLL	FALSE	11	P42224	NA_NA_NA_NA_NA_NA_NA_NA_NA_NA_NA_NA_NA	0.0011
303	516.309	2	-0.000724385	ARLFGLAQR	FALSE	9	Q00653	NA_NA_NA_NA_NA_NA_NA_NA_NA_NA_NA	0.0011
304	436.904	3	-0.000944598	QRYLDELMKL	FALSE	10	P46940	NA_NA_NA_NA_NA_NA_NA_NA_NA_NA_NA_NA	0.0011
305	435.54	3	0.000958737	YRFATDRNDF	FALSE	10	Q96B49	NA_NA_NA_NA_NA_NA_NA_NA_NA_NA_NA_NA	0.0011
306	607.32	2	-0.00078538	HRVGPIEATSF	FALSE	11	Q14213	NA_NA_NA_NA_NA_NA_NA_NA_NA_NA_NA_NA_NA	0.0011
307	638.317	2	-0.00398238	QRDPNSPLYSV	FALSE	11	Q9UMR2	NA_NA_NA_NA_NA_NA_NA_NA_NA_NA_NA_NA_NA	0.0011
308	640.351	2	0.00202312	SRIWSLQFSR	FALSE	10	K7EQF5	NA_NA_NA_NA_NA_NA_NA_NA_NA_NA_NA_NA	0.0011
309	572.81	2	0.000146622	HRYPTSIASL	FALSE	10	O43684	NA_NA_NA_NA_NA_NA_NA_NA_NA_NA_NA_NA	0.0011
310	562.304	2	-0.00224988	HRAFSVFLF	FALSE	9	Q13907	NA_NA_NA_NA_NA_NA_NA_NA_NA_NA_NA	0.0011
311	464.597	3	-0.00163126	KRWAASPKSFTL	FALSE	12	Q9Y490	NA_NA_NA_NA_NA_NA_NA_NA_NA_NA_NA_NA_NA_NA	0.0011
312	528.33	2	-0.00256438	SRVILAGNLL	FALSE	10	P49005	NA_NA_NA_NA_NA_NA_NA_NA_NA_NA_NA_NA	0.0011
313	731.35	2	-0.00482188	SRFLQDPYSTTF	FALSE	12	Q9HA65	NA_NA_NA_NA_NA_NA_NA_NA_NA_NA_NA_NA_NA_NA	0.0011
314	497.276	3	-0.00125793	KRIEPSVSLWQF	FALSE	12	P04035	NA_NA_NA_NA_NA_NA_NA_NA_NA_NA_NA_NA_NA_NA	0.0011
315	539.78	2	-0.000561884	GRSDADLVVF	FALSE	10	Q9Y6K5	NA_NA_NA_NA_NA_NA_NA_NA_NA_NA_NA_NA	0.0011
316	561.804	2	0.00111712	QRTFVLEVM	FALSE	9	Q01813	NA_NA_NA_NA_NA_NA_NA_NA_NA_NA_NA	0.0011
317	578.291	2	-0.00293638	GRYFNEGTVL	FALSE	10	Q14527	NA_NA_NA_NA_NA_NA_NA_NA_NA_NA_NA_NA	0.0011
318	564.724	2	-0.000638879	MRMGGGGAMNM	FALSE	11	P23246	NA_NA_NA_NA_NA_NA_NA_NA_NA_MetOX_NA_NA_NA	0.0011
319	375.866	3	0.000211404	WRVSLDVNH	FALSE	9	P04792	NA_NA_NA_NA_NA_NA_NA_NA_NA_NA_NA	0.0011
320	581.267	2	-0.00316138	GRFGQDFSTF	FALSE	10	Q9Y490	NA_NA_NA_NA_NA_NA_NA_NA_NA_NA_NA_NA	0.0011
321	472.271	2	-0.00167538	SRFPPLNL	FALSE	8	Q14687	NA_NA_NA_NA_NA_NA_NA_NA_NA_NA	0.0011
322	619.33	2	-0.00134938	KRLDINTNTY	FALSE	10	Q9H173	NA_NA_NA_NA_NA_NA_NA_NA_NA_NA_NA_NA	0.0011
323	492.793	2	-0.00251438	VRVPVTSNL	FALSE	9	Q9H0H0	NA_NA_NA_NA_NA_NA_NA_NA_NA_NA_NA	0.0011
324	542.336	2	0.000561124	ARVLDALVAR	FALSE	10	Q8IUR0	NA_NA_NA_NA_NA_NA_NA_NA_NA_NA_NA_NA	0.0011
325	355.941	4	0.000957793	ARLDETPFGKMR	FALSE	12	Q9UJK0	NA_NA_NA_NA_NA_NA_NA_NA_NA_NA_NA_NA_NA_NA	0.0011
326	545.305	2	-0.00303288	GRLKDIALGM	FALSE	10	O95721	NA_NA_NA_NA_NA_NA_NA_NA_NA_NA_MetOX_NA	0.001
327	358.19	3	-7.25955e-05	SRLQEVFGH	FALSE	9	P54136	NA_NA_NA_NA_NA_NA_NA_NA_NA_NA_NA	0.001
328	561.343	2	-0.000163878	ARHDVIKGLL	FALSE	10	Q9BWH6	NA_NA_NA_NA_NA_NA_NA_NA_NA_NA_NA_NA	0.001
329	597.818	2	-0.00156388	IRKFLEGNSM	FALSE	10	Q6ZUJ8	NA_NA_NA_NA_NA_NA_NA_NA_NA_NA_NA_NA	0.001
330	556.806	2	-0.00272188	SRFLKSDLF	FALSE	9	O43665	NA_NA_NA_NA_NA_NA_NA_NA_NA_NA_NA	0.001
331	560.782	2	-0.00173188	GRDTLGSSTNL	FALSE	11	O43164	NA_NA_NA_NA_NA_NA_NA_NA_NA_NA_NA_NA_NA	0.001
333	540.306	2	0.000707115	MRQKAVSLF	FALSE	9	P09912	NA_NA_NA_NA_NA_NA_NA_NA_NA_NA_NA	0.001
334	701.42	2	0.00367112	FRLFPVPGSGLVL	FALSE	13	P13473	NA_NA_NA_NA_NA_NA_NA_NA_NA_NA_NA_NA_NA_NA_NA	0.001
335	493.791	2	-0.00742338	EKIQVLGSL	FALSE	9	P49419	NA_NA_NA_NA_NA_NA_NA_NA_NA_NA_NA	0.001
336	501.617	3	0.000603408	RRWLGSAGLPSFR	FALSE	13	Q8TDM0	NA_NA_NA_NA_NA_NA_NA_NA_NA_NA_NA_NA_NA_NA_NA	0.001
340	440.932	3	0.000178067	KRWTKKVDLF	FALSE	10	Q96HI0	NA_NA_NA_NA_NA_NA_NA_NA_NA_NA_NA_NA	0.001
342	676.861	2	-0.00322638	KRYDPDILLGY	FALSE	11	O60673	NA_NA_NA_NA_NA_NA_NA_NA_NA_NA_NA_NA_NA	0.001
343	534.777	2	-0.000822376	ARYLVNEGF	FALSE	9	P54198	NA_NA_NA_NA_NA_NA_NA_NA_NA_NA_NA	0.001
344	545.322	2	-0.00313988	SRAFLAQALL	FALSE	10	P57088	NA_NA_NA_NA_NA_NA_NA_NA_NA_NA_NA_NA	0.001
345	684.85	2	-7.87639e-06	YRAQPSASLGVGY	FALSE	13	Q96PK6	NA_NA_NA_NA_NA_NA_NA_NA_NA_NA_NA_NA_NA_NA_NA	0.001
346	473.944	3	-0.0017426	RRFVNVVPTFGK	FALSE	12	P62861	NA_NA_NA_NA_NA_NA_NA_NA_NA_NA_NA_NA_NA_NA	0.0009
347	524.817	2	-0.000581384	LRHPNIVSL	FALSE	9	P06493	NA_NA_NA_NA_NA_NA_NA_NA_NA_NA_NA	0.0009
348	661.844	2	-0.00316688	WRISNINEKY	FALSE	10	Q13615	NA_NA_NA_NA_NA_NA_NA_NA_NA_NA_NA_NA	0.0009
349	659.831	2	-0.000117378	ARNVPVGFGESW	FALSE	12	P13051	NA_NA_NA_NA_NA_NA_NA_NA_NA_NA_NA_NA_NA_NA	0.0009
350	632.808	2	-0.00172788	QRVSPTNMQGF	FALSE	11	O15379	NA_NA_NA_NA_NA_NA_NA_NA_NA_NA_NA_NA_NA	0.0009
351	581.336	2	0.00069562	GRVQLFEISL	FALSE	10	Q8N5I2	NA_NA_NA_NA_NA_NA_NA_NA_NA_NA_NA_NA	0.0016
352	502.746	2	-0.000390876	FNGQFKTY	FALSE	8	P63220	NA_NA_NA_NA_NA_NA_NA_NA_NA_NA	0.0016
353	567.819	2	0.00112112	GRIKVNGIDY	FALSE	10	P82933	NA_NA_NA_NA_NA_NA_NA_NA_NA_NA_NA_NA	0.0016
354	502.779	2	-0.00136488	QRLGFTPSV	FALSE	9	Q9Y4A5	NA_NA_NA_NA_NA_NA_NA_NA_NA_NA_NA	0.0016
355	424.568	3	0.00116841	GRWQGNDIVVK	FALSE	11	Q13418	NA_NA_NA_NA_NA_NA_NA_NA_NA_NA_NA_NA_NA	0.0016
358	588.806	2	-0.00226538	GRIYLEPPTM	FALSE	10	Q9H4A5	NA_NA_NA_NA_NA_NA_NA_NA_NA_NA_NA_NA	0.0016
359	512.261	2	0.00025312	TRMSTVSEL	FALSE	9	Q99661	NA_NA_NA_NA_NA_NA_NA_NA_NA_NA_NA	0.0016
360	452.568	3	-0.000254931	YRWAVSSVMTR	FALSE	11	Q86TU7	NA_NA_NA_NA_NA_NA_NA_NA_NA_NA_NA_NA_NA	0.0016
361	579.792	2	-0.00126888	YRLESTLNY	FALSE	9	P35606	NA_NA_NA_NA_NA_NA_NA_NA_NA_NA_NA	0.0016
362	522.813	2	-0.00100738	NRLPLVVSF	FALSE	9	Q9UHA4	NA_NA_NA_NA_NA_NA_NA_NA_NA_NA_NA	0.0015
363	478.779	2	-0.00116488	GRVNVVEAL	FALSE	9	Q8IVB5	NA_NA_NA_NA_NA_NA_NA_NA_NA_NA_NA	0.0015
364	492.251	3	-0.00261227	HRFESVSHLISY	FALSE	12	P29353	NA_NA_NA_NA_NA_NA_NA_NA_NA_NA_NA_NA_NA_NA	0.0015
366	350.543	3	0.0010654	SRFAGASIKI	FALSE	10	O00425	NA_NA_NA_NA_NA_NA_NA_NA_NA_NA_NA_NA	0.0015
367	559.813	2	-0.00140438	ERNDLIVFL	FALSE	9	Q8TB96	NA_NA_NA_NA_NA_NA_NA_NA_NA_NA_NA	0.0018
368	585.314	2	6.26242e-05	YRESIFELL	FALSE	9	Q9BTT0	NA_NA_NA_NA_NA_NA_NA_NA_NA_NA_NA	0.0018
369	634.814	2	-0.00327538	ARFPQLDSTSF	FALSE	11	P49327	NA_NA_NA_NA_NA_NA_NA_NA_NA_NA_NA_NA_NA	0.0018
370	668.846	2	0.00445262	DEVSRIVGSVEF	FALSE	12	P42224	NA_NA_NA_NA_NA_NA_NA_NA_NA_NA_NA_NA_NA_NA	0.0018
371	533.803	2	-0.00328288	GRYLFLNAI	FALSE	9	A5YKK6	NA_NA_NA_NA_NA_NA_NA_NA_NA_NA_NA	0.0018
372	461.571	3	-0.000264596	QRWDEAFRKF	FALSE	10	P27695	NA_NA_NA_NA_NA_NA_NA_NA_NA_NA_NA_NA	0.0018
373	535.808	2	-0.00125638	ARNITVIFH	FALSE	9	Q96A65	NA_NA_NA_NA_NA_NA_NA_NA_NA_NA_NA	0.0018
374	541.799	2	-0.00242888	QRVNVQPEL	FALSE	9	P53611	NA_NA_NA_NA_NA_NA_NA_NA_NA_NA_NA	0.0018
375	448.291	2	0.000731122	GRAPVLVAL	FALSE	9	O75365	NA_NA_NA_NA_NA_NA_NA_NA_NA_NA_NA	0.0018
376	574.335	2	0.00130412	ARLALSPVPSH	FALSE	11	P40259	NA_NA_NA_NA_NA_NA_NA_NA_NA_NA_NA_NA_NA	0.0018
377	484.817	2	0.00636612	NQLVIIVGI	FALSE	9	Q86YT9	NA_NA_NA_NA_NA_NA_NA_NA_NA_NA_NA	0.0018
378	484.237	2	-0.000276376	GRYDGLVGM	FALSE	9	P12081	NA_NA_NA_NA_NA_NA_NA_NA_NA_NA_NA	0.0018
379	486.788	2	-0.00219838	AALQELLSK	FALSE	9	P62851	NA_NA_NA_NA_NA_NA_NA_NA_NA_NA_NA	0.002
380	577.324	2	0.00130362	SRFLSGIINF	FALSE	10	Q9BZD4	NA_NA_NA_NA_NA_NA_NA_NA_NA_NA_NA_NA	0.002
381	350.885	3	-0.00111293	IRDALRPPL	FALSE	9	Q14008	NA_NA_NA_NA_NA_NA_NA_NA_NA_NA_NA	0.002
382	568.303	2	0.000742619	SRSLEASTATL	FALSE	11	Q9BV73	NA_NA_NA_NA_NA_NA_NA_NA_NA_NA_NA_NA_NA	0.002
383	507.807	2	-0.00192588	QRIGPLAFL	FALSE	9	Q8NFZ0	NA_NA_NA_NA_NA_NA_NA_NA_NA_NA_NA	0.002
384	476.231	2	-0.00010488	GRFEGDTGL	FALSE	9	O00267	NA_NA_NA_NA_NA_NA_NA_NA_NA_NA_NA	0.002
386	389.47	4	0.00141004	RRFQDAGKEVIVH	FALSE	13	Q8TAG9	NA_NA_NA_NA_NA_NA_NA_NA_NA_NA_NA_NA_NA_NA_NA	0.002
387	532.28	2	-0.000629376	QRVGGVDVSF	FALSE	10	Q8N8Q3	NA_NA_NA_NA_NA_NA_NA_NA_NA_NA_NA_NA	0.002
388	624.84	2	0.000957124	GRFQKDISQGL	FALSE	11	P17036	NA_NA_NA_NA_NA_NA_NA_NA_NA_NA_NA_NA_NA	0.002
389	601.306	2	-0.000289878	SRFIKFQEM	FALSE	9	P33993	NA_NA_NA_NA_NA_NA_NA_NA_NA_MetOX_NA	0.002
390	606.804	2	-6.88757e-05	SRVQGFQVEY	FALSE	10	O95793	NA_NA_NA_NA_NA_NA_NA_NA_NA_NA_NA_NA	0.002
391	439.587	3	-0.000438265	SRLQGVERIMK	FALSE	11	Q9GZR1	NA_NA_NA_NA_NA_NA_NA_NA_NA_NA_NA_NA_NA	0.002
392	516.268	2	-0.00170688	SRMNPLGSGL	FALSE	10	Q9NR09	NA_NA_NA_NA_NA_NA_NA_NA_NA_NA_NA_NA	0.0022
393	547.82	2	-0.00203288	LRTALIFGGF	FALSE	10	Q8N5G0	NA_NA_NA_NA_NA_NA_NA_NA_NA_NA_NA_NA	0.0022
394	606.327	2	0.00136362	GRFTAAELLSF	FALSE	11	Q8TCT6	NA_NA_NA_NA_NA_NA_NA_NA_NA_NA_NA_NA_NA	0.0022
395	574.301	2	0.00237712	YRQPPVPQY	FALSE	9	Q86TG7	NA_NA_NA_NA_NA_NA_NA_NA_NA_NA_NA	0.0022
396	600.34	2	0.00131812	ARWQQVWLL	FALSE	9	Q9UPN3-5	NA_NA_NA_NA_NA_NA_NA_NA_NA_NA_NA	0.0022
397	618.304	2	-0.00334338	GRFSSTTGLFY	FALSE	11	P51817	NA_NA_NA_NA_NA_NA_NA_NA_NA_NA_NA_NA_NA	0.0022
398	468.261	2	0.00546212	LCAFQLVAA	FALSE	9	Q8IVV8	NA_NA_NA_NA_NA_NA_NA_NA_NA_NA_NA	0.0022
399	583.339	2	-0.00198988	YRFLIQNVL	FALSE	9	P41252	NA_NA_NA_NA_NA_NA_NA_NA_NA_NA_NA	0.0022
400	532.941	3	-0.00252693	RRADLTYAEFVQQ	FALSE	13	Q96S16	NA_NA_NA_NA_NA_NA_NA_NA_NA_NA_NA_NA_NA_NA_NA	0.0022
401	503.258	3	-0.000463598	TRFLAEEGFYKF	FALSE	12	P46977	NA_NA_NA_NA_NA_NA_NA_NA_NA_NA_NA_NA_NA_NA	0.0022
402	548.791	2	-0.00405738	TRTLMVQTF	FALSE	9	Q8WUY9	NA_NA_NA_NA_NA_NA_NA_NA_NA_NA_NA	0.0022
403	401.854	3	0.00033874	GRFDSEKMAY	FALSE	10	P51798	NA_NA_NA_NA_NA_NA_NA_NA_NA_NA_NA_NA	0.0022
404	819.937	2	0.00319712	KRFQVEQIGENKY	FALSE	13	Q9UPN3-5	NA_NA_NA_NA_NA_NA_NA_NA_NA_NA_NA_NA_NA_NA_NA	0.0022
405	504.778	2	0.000477616	ARYLGSTQL	FALSE	9	O96018	NA_NA_NA_NA_NA_NA_NA_NA_NA_NA_NA	0.0022
406	583.793	2	-0.00351188	WRSDVLVEY	FALSE	9	P15586	NA_NA_NA_NA_NA_NA_NA_NA_NA_NA_NA	0.0022
407	487.776	2	0.000617116	ARYPNGVVV	FALSE	9	Q96JC1	NA_NA_NA_NA_NA_NA_NA_NA_NA_NA_NA	0.0022
408	560.81	2	-0.00146538	QRNLFILAY	FALSE	9	O95573	pyrGlu_NA_NA_NA_NA_NA_NA_NA_NA_NA_NA	0.0022
409	557.34	2	-0.00303238	IRHYVSILL	FALSE	9	Q9P0I2	NA_NA_NA_NA_NA_NA_NA_NA_NA_NA_NA	0.0022
410	487.784	2	-0.00114638	GRTSLTNLL	FALSE	9	P30048	NA_NA_NA_NA_NA_NA_NA_NA_NA_NA_NA	0.0021
411	604.318	2	-0.00185088	TRLDESAFVGL	FALSE	11	O94898	NA_NA_NA_NA_NA_NA_NA_NA_NA_NA_NA_NA_NA	0.0021
412	692.846	2	0.00187262	YRWHINFTTF	FALSE	10	O00767	NA_NA_NA_NA_NA_NA_NA_NA_NA_NA_NA_NA	0.0021
413	668.349	2	6.01173e-05	QRLPSETIQTY	FALSE	11	Q9NPI7	NA_NA_NA_NA_NA_NA_NA_NA_NA_NA_NA_NA_NA	0.0021
414	532.784	2	-0.00228188	SRHPFPGPGL	FALSE	10	P49915	NA_NA_NA_NA_NA_NA_NA_NA_NA_NA_NA_NA	0.0021
416	519.764	2	-0.000711383	QRFEGTTSL	FALSE	9	Q4G0F5	NA_NA_NA_NA_NA_NA_NA_NA_NA_NA_NA	0.0021
417	705.382	2	0.00122562	NRYYPQILTNK	FALSE	11	Q96LW7	NA_NA_NA_NA_NA_NA_NA_NA_NA_NA_NA_NA_NA	0.0021
419	455.248	3	0.000795403	RRYPGSDRIML	FALSE	11	Q6ZS81	NA_NA_NA_NA_NA_NA_NA_NA_NA_NA_NA_NA_NA	0.0021
421	514.303	2	-0.00153888	GRLDAVLQR	FALSE	9	P29590	NA_NA_NA_NA_NA_NA_NA_NA_NA_NA_NA	0.0021
423	693.852	2	-0.00278888	LRWEPSSQSTVP	FALSE	12	P03989	NA_NA_NA_NA_NA_NA_NA_NA_NA_NA_NA_NA_NA_NA	0.0021
424	443.279	2	-0.000900884	ARLGVVTGL	FALSE	9	P49281	NA_NA_NA_NA_NA_NA_NA_NA_NA_NA_NA	0.0021
425	590.81	2	0.000345619	GRLQLFGQDF	FALSE	10	Q92619	NA_NA_NA_NA_NA_NA_NA_NA_NA_NA_NA_NA	0.0021
426	725.888	2	-0.00083188	IRWEDKESKIF	FALSE	11	P41212	NA_NA_NA_NA_NA_NA_NA_NA_NA_NA_NA_NA_NA	0.0021
427	657.403	2	0.00222112	KRLDLAGPLLAF	FALSE	12	P30876	NA_NA_NA_NA_NA_NA_NA_NA_NA_NA_NA_NA_NA_NA	0.0024
428	593.289	2	0.000245621	GRWPGSSLYY	FALSE	10	Q14739	NA_NA_NA_NA_NA_NA_NA_NA_NA_NA_NA_NA	0.0024
429	472.761	2	-0.000871876	SRNEALAAL	FALSE	9	P13797	NA_NA_NA_NA_NA_NA_NA_NA_NA_NA_NA	0.0024
430	509.811	2	-0.000599385	LRHPGIVNL	FALSE	9	Q9BZL6	NA_NA_NA_NA_NA_NA_NA_NA_NA_NA_NA	0.0024
431	381.846	3	0.000205738	ERFSGTYHF	FALSE	9	Q9Y6J8	NA_NA_NA_NA_NA_NA_NA_NA_NA_NA_NA	0.0024
432	605.798	2	-0.000529379	QRVASVMQEY	FALSE	10	P25787	NA_NA_NA_NA_NA_NA_NA_NA_NA_NA_NA_NA	0.0024
433	596.298	2	-0.00376488	YRFFLGNQF	FALSE	9	Q9UPN3-5	NA_NA_NA_NA_NA_NA_NA_NA_NA_NA_NA	0.0024
434	356.208	3	0.0010364	GRFLEIGKF	FALSE	9	P49327	NA_NA_NA_NA_NA_NA_NA_NA_NA_NA_NA	0.0024
435	563.329	2	-0.00125688	AQWQKVLPR	FALSE	9	Q9Y2R0	NA_NA_NA_NA_NA_NA_NA_NA_NA_NA_NA	0.0024
436	593.317	2	-0.000511379	SRTQVTYLAF	FALSE	10	P43007	NA_NA_NA_NA_NA_NA_NA_NA_NA_NA_NA_NA	0.0024
437	480.768	2	-0.00104338	MRQTVAVGV	FALSE	9	Q05639	NA_NA_NA_NA_NA_NA_NA_NA_NA_NA_NA	0.0023
438	509.274	2	-0.000457877	SRMPVSIDL	FALSE	9	Q96T58	NA_NA_NA_NA_NA_NA_NA_NA_NA_NA_NA	0.0023
439	508.31	2	-0.00519488	AMVLGSVLLL	FALSE	10	Q08554	NA_NA_NA_NA_NA_NA_NA_NA_NA_NA_NA_NA	0.0023
441	476.599	3	0.00230941	RRWLKDQELSP	FALSE	11	O95139	NA_NA_NA_NA_NA_NA_NA_NA_NA_NA_NA_NA_NA	0.0023
442	574.816	2	0.00126112	QRNVNIFKF	FALSE	9	P00338	pyrGlu_NA_NA_NA_NA_NA_NA_NA_NA_NA_NA	0.0023
443	482.789	2	7.5119e-05	HRAGVQIAI	FALSE	9	Q9GZX7	NA_NA_NA_NA_NA_NA_NA_NA_NA_NA_NA	0.0023
445	484.818	2	0.00124912	QRAVLLVGL	FALSE	9	Q9Y5M8	NA_NA_NA_NA_NA_NA_NA_NA_NA_NA_NA	0.0023
446	464.284	2	-0.00158288	GRSPLTLAL	FALSE	9	Q504T8	NA_NA_NA_NA_NA_NA_NA_NA_NA_NA_NA	0.0023
447	644.877	2	0.00260312	FRLFPVPGSGLV	FALSE	12	P13473	NA_NA_NA_NA_NA_NA_NA_NA_NA_NA_NA_NA_NA_NA	0.0023
448	566.316	2	-0.00164638	VRNIVQQQF	FALSE	9	Q86UV5	NA_NA_NA_NA_NA_NA_NA_NA_NA_NA_NA	0.0023
449	472.282	2	-0.000840381	IRSDAVALV	FALSE	9	Q15067	NA_NA_NA_NA_NA_NA_NA_NA_NA_NA_NA	0.0023
450	432.256	3	-0.000394262	TRLPLISGFYK	FALSE	11	P78527	NA_NA_NA_NA_NA_NA_NA_NA_NA_NA_NA_NA_NA	0.0023
451	610.336	2	-0.00184338	VRSDVPSLVTF	FALSE	11	Q53HC5	NA_NA_NA_NA_NA_NA_NA_NA_NA_NA_NA_NA_NA	0.0023
452	481.26	2	0.00486612	KNDMVELL	FALSE	8	Q9Y4W6	NA_NA_NA_NA_NA_NA_NA_NA_NA_NA	0.0023
453	545.799	2	-0.00103938	TRTNMLLEL	FALSE	9	Q9P0P0	NA_NA_NA_NA_NA_NA_NA_NA_NA_NA_NA	0.0022
454	429.259	3	-0.000727264	ARLDPKFLVNL	FALSE	11	Q96RN5	NA_NA_NA_NA_NA_NA_NA_NA_NA_NA_NA_NA_NA	0.0022
455	635.4	2	0.00116412	KVVLTQANKLGV	FALSE	12	O94979	NA_NA_NA_NA_NA_NA_NA_NA_NA_NA_NA_NA_NA_NA	0.0022
456	560.316	2	-0.00204588	ARFEQLISR	FALSE	9	Q9HCS7	NA_NA_NA_NA_NA_NA_NA_NA_NA_NA_NA	0.0022
457	425.567	3	-0.0012616	YRYYQQLKL	FALSE	9	Q99808	NA_NA_NA_NA_NA_NA_NA_NA_NA_NA_NA	0.0022
458	576.321	2	0.000411618	QRNVNVFKF	FALSE	9	P07195	NA_NA_NA_NA_NA_NA_NA_NA_NA_NA_NA	0.0022
459	563.356	2	-0.00281438	GRLAAIVAKQV	FALSE	11	P40429	NA_NA_NA_NA_NA_NA_NA_NA_NA_NA_NA_NA_NA	0.0022
460	637.311	2	-0.00426888	IRFEDNGIYF	FALSE	10	P40259	NA_NA_NA_NA_NA_NA_NA_NA_NA_NA_NA_NA	0.0022
461	506.811	2	-0.000764877	IRNDGVLLL	FALSE	9	O60763	NA_NA_NA_NA_NA_NA_NA_NA_NA_NA_NA	0.0022
462	492.269	2	-0.000732875	GRFFLSSGL	FALSE	9	Q9BTV4	NA_NA_NA_NA_NA_NA_NA_NA_NA_NA_NA	0.0022
463	573.78	2	-0.00310438	SRFPYYNSL	FALSE	9	A2RUS2	NA_NA_NA_NA_NA_NA_NA_NA_NA_NA_NA	0.0022
464	517.292	2	-0.00193938	VRFGLSNQL	FALSE	9	Q8IZK6	NA_NA_NA_NA_NA_NA_NA_NA_NA_NA_NA	0.0022
465	591.798	2	-0.00299788	ERFPYPFQV	FALSE	9	Q06187	NA_NA_NA_NA_NA_NA_NA_NA_NA_NA_NA	0.0022
466	439.236	3	0.000706405	GRLAHEVGWKY	FALSE	11	P40429	NA_NA_NA_NA_NA_NA_NA_NA_NA_NA_NA_NA_NA	0.0022
467	622.871	2	-0.00115388	TRNALPALLIY	FALSE	11	Q13371	NA_NA_NA_NA_NA_NA_NA_NA_NA_NA_NA_NA_NA	0.0022
468	704.878	2	0.00177812	SGGLLKALRSDSY	FALSE	13	P52298	Ac_NA_NA_NA_NA_NA_NA_NA_NA_NA_NA_NA_NA_NA_NA	0.0022
469	520.744	2	-0.00206438	TRMDSNFGL	FALSE	9	O43463	NA_NA_NA_NA_NA_NA_NA_NA_NA_NA_NA	0.0022
470	553.782	2	-0.00143638	ARFQEQSQL	FALSE	9	O60287	NA_NA_NA_NA_NA_NA_NA_NA_NA_NA_NA	0.0022
471	523.788	2	-0.00336438	QRIAQNFGL	FALSE	9	P27144	NA_NA_NA_NA_NA_NA_NA_NA_NA_NA_NA	0.0022
472	654.797	2	5.96239e-05	ARYSGSYNDYL	FALSE	11	Q96PK6	NA_NA_NA_NA_NA_NA_NA_NA_NA_NA_NA_NA_NA	0.0022
473	492.815	2	0.000692121	GRVQVVTLL	FALSE	9	A2A2Z9	NA_NA_NA_NA_NA_NA_NA_NA_NA_NA_NA	0.0022
474	499.779	2	-0.00129988	QRGPVRVGF	FALSE	9	Q9H0K1	pyrGlu_NA_NA_NA_NA_NA_NA_NA_NA_NA_NA	0.0022
475	553.303	2	-0.000903881	ARFGESIVNL	FALSE	10	P13612	NA_NA_NA_NA_NA_NA_NA_NA_NA_NA_NA_NA	0.0022
477	382.523	3	0.000653737	ARLQDQHMF	FALSE	9	Q9H2D1	NA_NA_NA_NA_NA_NA_NA_NA_NA_NA_NA	0.0022
478	548.827	2	-0.000846383	ARKLIGDPNL	FALSE	10	P62826	NA_NA_NA_NA_NA_NA_NA_NA_NA_NA_NA_NA	0.0022
479	600.821	2	-0.00206088	VRFDVHDVTL	FALSE	10	P13639	NA_NA_NA_NA_NA_NA_NA_NA_NA_NA_NA_NA	0.0022
480	684.869	2	1.46216e-05	KRMSVTEGGIKY	FALSE	12	P24928	NA_NA_NA_NA_NA_NA_NA_NA_NA_NA_NA_NA_NA_NA	0.0022
481	493.268	2	0.00348712	EEKDVITGL	FALSE	9	P04839	pyrGlu_NA_NA_NA_NA_NA_NA_NA_NA_NA_NA	0.0024
482	524.811	2	-0.00116538	VRYSQLLGL	FALSE	9	Q15036	NA_NA_NA_NA_NA_NA_NA_NA_NA_NA_NA	0.0024
483	514.304	2	0.00108112	ARLLEVPVM	FALSE	9	Q96AB3	NA_NA_NA_NA_NA_NA_NA_NA_NA_NA_NA	0.0024
484	626.858	2	0.00099612	KRFEELGVKF	FALSE	10	Q04760	NA_NA_NA_NA_NA_NA_NA_NA_NA_NA_NA_NA	0.0024
485	539.796	2	-0.00235438	ARNDYLLTL	FALSE	9	O94868	NA_NA_NA_NA_NA_NA_NA_NA_NA_NA_NA	0.0024
486	601.337	2	-0.00147838	ARHSLLQTLY	FALSE	10	P46060	NA_NA_NA_NA_NA_NA_NA_NA_NA_NA_NA_NA	0.0024
487	444.575	3	-9.82642e-05	ARDEIEAMIKR	FALSE	11	Q460N5;Q460N5-1	NA_NA_NA_NA_NA_NA_NA_NA_NA_NA_NA_NA_NA	0.0024
488	522.772	2	-0.00020538	FAVLEDHTL	FALSE	9	Q8IVM0	NA_NA_NA_NA_NA_NA_NA_NA_NA_NA_NA	0.0024
490	560.311	2	-0.00132888	ARIKINEEF	FALSE	9	Q5U5X0	NA_NA_NA_NA_NA_NA_NA_NA_NA_NA_NA	0.0024
491	497.281	2	-0.00108638	MRLGSIFGL	FALSE	9	Q13200	NA_NA_NA_NA_NA_NA_NA_NA_NA_NA_NA	0.0024
492	589.284	2	-0.00151138	ARHEFEELF	FALSE	9	P41226	NA_NA_NA_NA_NA_NA_NA_NA_NA_NA_NA	0.0024
493	363.214	3	0.000382071	LRVDPVNFK	FALSE	9	P69905	NA_NA_NA_NA_NA_NA_NA_NA_NA_NA_NA	0.0024
494	753.924	2	-0.00303488	KRFSMVVQDGIVK	FALSE	13	P30044	NA_NA_NA_NA_NA_NA_NA_NA_NA_NA_NA_NA_NA_NA_NA	0.0024
495	531.803	2	0.00711912	LVGADKPISY	FALSE	10	Q8N431	NA_NA_NA_NA_NA_NA_NA_NA_NA_NA_NA_NA	0.0024
496	477.599	3	-0.000977597	GRLEVGTETIIDK	FALSE	13	Q01581	NA_NA_NA_NA_NA_NA_NA_NA_NA_NA_NA_NA_NA_NA_NA	0.0024
497	473.272	2	-0.000872376	ARSDLLSAI	FALSE	9	Q9Y6W5	NA_NA_NA_NA_NA_NA_NA_NA_NA_NA_NA	0.0024
498	475.277	2	-0.000758385	ARLPPEPGL	FALSE	9	Q8IY67-2	NA_NA_NA_NA_NA_NA_NA_NA_NA_NA_NA	0.0024
499	374.898	3	-0.000541264	TRLFAVLRF	FALSE	9	P46977	NA_NA_NA_NA_NA_NA_NA_NA_NA_NA_NA	0.0024
500	574.257	2	-0.00190488	MRLDDTYSF	FALSE	9	Q9H583	NA_NA_NA_NA_NA_NA_NA_NA_NA_NA_NA	0.0024
501	498.952	3	-0.000574264	RRILDSAEFIKF	FALSE	12	P78347	NA_NA_NA_NA_NA_NA_NA_NA_NA_NA_NA_NA_NA_NA	0.0023
502	417.242	3	0.0008204	GRFEVGKKICL	FALSE	11	Q9Y385	NA_NA_NA_NA_NA_NA_NA_NA_NA_NA_NA_NA_NA	0.0023
503	617.795	2	-0.00174338	YRFNGQYSSL	FALSE	10	Q4ZIN3	NA_NA_NA_NA_NA_NA_NA_NA_NA_NA_NA_NA	0.0023
504	531.313	2	0.00139912	SRVPLFPVF	FALSE	9	Q9H6F2	NA_NA_NA_NA_NA_NA_NA_NA_NA_NA_NA	0.0023
505	600.858	2	0.00116512	GRVGTVIGSNKL	FALSE	12	P09874	NA_NA_NA_NA_NA_NA_NA_NA_NA_NA_NA_NA_NA_NA	0.0023
506	515.289	2	0.000246619	ARDNTINLI	FALSE	9	O15144	NA_NA_NA_NA_NA_NA_NA_NA_NA_NA_NA	0.0023
507	517.291	2	-0.00233938	SRVLQNVAF	FALSE	9	Q16548	NA_NA_NA_NA_NA_NA_NA_NA_NA_NA_NA	0.0023
509	527.269	3	0.000248399	QRYYFEGIKQTF	FALSE	12	O95433	NA_NA_NA_NA_NA_NA_NA_NA_NA_NA_NA_NA_NA_NA	0.0023
510	611.832	2	-0.00281438	LRFQSSAVMAL	FALSE	11	P68431	NA_NA_NA_NA_NA_NA_NA_NA_NA_NA_NA_NA_NA	0.0023
511	507.293	2	0.00170312	ARNALIEQV	FALSE	9	Q969S9	NA_NA_NA_NA_NA_NA_NA_NA_NA_NA_NA	0.0023
512	601.347	2	-0.00184288	SRISLADIAQK	FALSE	11	O43242	NA_NA_NA_NA_NA_NA_NA_NA_NA_NA_NA_NA_NA	0.0025
513	538.318	2	0.00108512	GRLFQLQTL	FALSE	9	Q96LI5	NA_NA_NA_NA_NA_NA_NA_NA_NA_NA_NA	0.0025
514	550.347	2	0.00152812	SRSVALAVLAL	FALSE	11	P61769	NA_NA_NA_NA_NA_NA_NA_NA_NA_NA_NA_NA_NA	0.0025
515	394.589	3	0.000833407	SRVNIPKVLR	FALSE	10	Q00610	NA_NA_NA_NA_NA_NA_NA_NA_NA_NA_NA_NA	0.0025
516	567.309	2	0.00212212	GRFQIVNNSV	FALSE	10	Q8TEP8	NA_NA_NA_NA_NA_NA_NA_NA_NA_NA_NA_NA	0.0025
517	503.81	2	-0.00169988	ARLQIVLGH	FALSE	9	O14832	NA_NA_NA_NA_NA_NA_NA_NA_NA_NA_NA	0.0025
518	389.217	3	-0.000539601	GRTEILKWY	FALSE	9	Q96TA2	NA_NA_NA_NA_NA_NA_NA_NA_NA_NA_NA	0.0025
519	659.351	2	-0.000985375	GRLPSSWALFSP	FALSE	12	Q8TB96	NA_NA_NA_NA_NA_NA_NA_NA_NA_NA_NA_NA_NA_NA	0.0025
520	688.913	2	0.00436012	IRWGFIPLVIY	FALSE	11	Q9P0U1	NA_NA_NA_NA_NA_NA_NA_NA_NA_NA_NA_NA_NA	0.0025
521	500.793	2	0.00474512	VLNDLLNSL	FALSE	9	Q8N9V7	NA_NA_NA_NA_NA_NA_NA_NA_NA_NA_NA	0.0025
522	503.306	2	-0.00295788	GRIVTLISF	FALSE	9	Q07820	NA_NA_NA_NA_NA_NA_NA_NA_NA_NA_NA	0.0025
523	557.268	2	-0.00206188	YRFGDSQQL	FALSE	9	Q9UPN3	NA_NA_NA_NA_NA_NA_NA_NA_NA_NA_NA	0.0025
524	528.742	2	-0.000821882	LRDNSTMGY	FALSE	9	P07900	NA_NA_NA_NA_NA_NA_NA_NA_NA_NA_NA	0.0025
525	508.299	2	-0.000321383	ARLLQTSNI	FALSE	9	O75914	NA_NA_NA_NA_NA_NA_NA_NA_NA_NA_NA	0.0032
526	515.796	2	-0.00255438	AKQGSLINSL	FALSE	10	P35658	NA_NA_NA_NA_NA_NA_NA_NA_NA_NA_NA_NA	0.0032
528	464.237	2	-0.00103338	GRYGAISGF	FALSE	9	Q9BT67	NA_NA_NA_NA_NA_NA_NA_NA_NA_NA_NA	0.0032
529	503.28	2	0.00564212	GRSEILMSL	FALSE	9	Q9P2D3	NA_NA_NA_NA_NA_NA_NA_NA_NA_NA_NA	0.0032
530	530.791	2	-0.00237188	ERFNVPVSL	FALSE	9	P82979	NA_NA_NA_NA_NA_NA_NA_NA_NA_NA_NA	0.0031
531	547.269	2	0.00108062	GRYEAEGQAL	FALSE	10	Q8TD16	NA_NA_NA_NA_NA_NA_NA_NA_NA_NA_NA_NA	0.0031
532	595.847	2	-0.00127938	GRIKAIQLEY	FALSE	10	O43242	NA_NA_NA_NA_NA_NA_NA_NA_NA_NA_NA_NA	0.0031
533	503.75	2	-0.00140488	GRYPEAQSV	FALSE	9	Q99615	NA_NA_NA_NA_NA_NA_NA_NA_NA_NA_NA	0.0031
534	510.77	2	-0.00250538	LFSAGLNGEI	FALSE	10	Q969X6	NA_NA_NA_NA_NA_NA_NA_NA_NA_NA_NA_NA	0.0031
535	511.778	2	0.00163162	ARFGLIQSM	FALSE	9	P53990	NA_NA_NA_NA_NA_NA_NA_NA_NA_NA_NA	0.0031
536	636.343	2	-0.00393388	ARHSNVNLTIF	FALSE	11	Q96AK3	NA_NA_NA_NA_NA_NA_NA_NA_NA_NA_NA_NA_NA	0.0031
537	377.909	3	0.000359739	LRHPNILRL	FALSE	9	O14965	NA_NA_NA_NA_NA_NA_NA_NA_NA_NA_NA	0.003
538	616.819	2	-0.00389338	ARADLGQQVQF	FALSE	11	Q9NP58	NA_NA_NA_NA_NA_NA_NA_NA_NA_NA_NA_NA_NA	0.003
539	486.768	2	-0.00114288	ARSPAINLM	FALSE	9	Q8IXQ6	NA_NA_NA_NA_NA_NA_NA_NA_NA_NA_NA	0.003
540	613.882	2	-0.00115288	KRIGKVLDNAI	FALSE	11	Q01082	NA_NA_NA_NA_NA_NA_NA_NA_NA_NA_NA_NA_NA	0.003
541	565.822	2	-0.000207378	GRVKLMQADL	FALSE	10	O00534	NA_NA_NA_NA_NA_NA_NA_NA_NA_NA_NA_NA	0.003
542	516.797	2	0.000785622	VRNPFTVTV	FALSE	9	Q49AG3	NA_NA_NA_NA_NA_NA_NA_NA_NA_NA_NA	0.003
543	564.324	2	-0.00354788	SRYLYTLVI	FALSE	9	P63173	NA_NA_NA_NA_NA_NA_NA_NA_NA_NA_NA	0.003
544	660.395	2	-0.00119638	KRLLPVFAQTF	FALSE	11	Q9ULT8	NA_NA_NA_NA_NA_NA_NA_NA_NA_NA_NA_NA_NA	0.003
545	621.853	2	-0.00390088	KRVELLQDEL	FALSE	10	Q6ZMI0	NA_NA_NA_NA_NA_NA_NA_NA_NA_NA_NA_NA	0.003
546	521.798	2	-0.00125438	QRTSILQTL	FALSE	9	Q15025	pyrGlu_NA_NA_NA_NA_NA_NA_NA_NA_NA_NA	0.003
547	560.304	2	0.000450122	HRILMTYSV	FALSE	9	Q9UIG0	NA_NA_NA_NA_NA_NA_NA_NA_NA_NA_NA	0.003
548	666.854	2	0.00258162	YRFSNLLGTVY	FALSE	11	Q15269	NA_NA_NA_NA_NA_NA_NA_NA_NA_NA_NA_NA_NA	0.003
549	542.828	2	-0.00145788	ARLTPIPFGL	FALSE	10	Q6YI46	NA_NA_NA_NA_NA_NA_NA_NA_NA_NA_NA_NA	0.003
550	510.268	2	0.000478621	ARTPQNFSV	FALSE	9	Q96RN5	NA_NA_NA_NA_NA_NA_NA_NA_NA_NA_NA	0.003
551	493.793	2	-0.000275375	ARWLALGSL	FALSE	9	O94919	NA_NA_NA_NA_NA_NA_NA_NA_NA_NA_NA	0.003
552	509.808	2	0.00111762	GRLLINSVF	FALSE	9	Q96CP6	NA_NA_NA_NA_NA_NA_NA_NA_NA_NA_NA	0.003
553	536.277	2	-0.000554878	SRYLTLDGF	FALSE	9	Q7L576	NA_NA_NA_NA_NA_NA_NA_NA_NA_NA_NA	0.003
554	580.868	2	0.000294621	NRLLKLFTR	FALSE	9	O60216	NA_NA_NA_NA_NA_NA_NA_NA_NA_NA_NA	0.003
555	532.283	2	-0.00122588	IRMPSLPSY	FALSE	9	P29401	NA_NA_NA_NA_NA_NA_NA_NA_NA_NA_NA	0.003
556	548.283	2	-0.00165738	SRKFGEAIGM	FALSE	10	P78347	NA_NA_NA_NA_NA_NA_NA_NA_NA_NA_NA_NA	0.0029
557	523.292	2	-0.00203988	IRAPQIGGSF	FALSE	10	O60830	NA_NA_NA_NA_NA_NA_NA_NA_NA_NA_NA_NA	0.0032
558	531.31	2	0.000710125	KRYAVPSAGL	FALSE	10	P78527	NA_NA_NA_NA_NA_NA_NA_NA_NA_NA_NA_NA	0.0032
559	558.275	2	-0.00163588	WRYMGGFAK	FALSE	9	O43676	NA_NA_NA_NA_NA_NA_NA_NA_NA_NA_NA	0.0032
560	627.316	2	-0.00184338	GRFASFEAQGAL	FALSE	12	P01903	NA_NA_NA_NA_NA_NA_NA_NA_NA_NA_NA_NA_NA_NA	0.0032
561	714.353	2	0.00407962	GRWFPEGPTHML	FALSE	12	Q14997	NA_NA_NA_NA_NA_NA_NA_NA_NA_NA_NA_NA_NA_NA	0.0032
562	549.805	2	-0.00191388	FRHENIIGI	FALSE	9	P28482	NA_NA_NA_NA_NA_NA_NA_NA_NA_NA_NA	0.0032
563	672.884	2	-0.00229338	QRLYPVLQQSL	FALSE	11	Q5RKV6	NA_NA_NA_NA_NA_NA_NA_NA_NA_NA_NA_NA_NA	0.0032
564	362.559	3	0.00139207	GRLPLFGLGR	FALSE	10	P82930	NA_NA_NA_NA_NA_NA_NA_NA_NA_NA_NA_NA	0.0032
565	539.815	2	-0.00164688	LRVTSVVTGF	FALSE	10	Q9NY97	NA_NA_NA_NA_NA_NA_NA_NA_NA_NA_NA_NA	0.0032
566	567.831	2	0.00134562	LRIADLISSF	FALSE	10	Q13571	NA_NA_NA_NA_NA_NA_NA_NA_NA_NA_NA_NA	0.0032
567	537.8	2	-0.00129688	SRLFDPINL	FALSE	9	Q9UP83	NA_NA_NA_NA_NA_NA_NA_NA_NA_NA_NA	0.0032
568	565.277	2	0.00185262	GRFAPQFSGY	FALSE	10	Q9Y4E8	NA_NA_NA_NA_NA_NA_NA_NA_NA_NA_NA_NA	0.0032
569	673.892	2	-0.00131788	SRVGVAVVNGLLY	FALSE	13	O94889	NA_NA_NA_NA_NA_NA_NA_NA_NA_NA_NA_NA_NA_NA_NA	0.0033
570	580.798	2	-0.000732375	HRYDLGGLVM	FALSE	10	Q15274	NA_NA_NA_NA_NA_NA_NA_NA_NA_NA_NA_NA	0.0033
572	402.474	4	0.000193796	IRWEDKESKIFR	FALSE	12	P41212	NA_NA_NA_NA_NA_NA_NA_NA_NA_NA_NA_NA_NA_NA	0.0033
573	587.783	2	-0.00327888	GRHYWEVEV	FALSE	9	Q8WV44	NA_NA_NA_NA_NA_NA_NA_NA_NA_NA_NA	0.0033
574	540.968	3	-0.000624594	IRFFPLESWQIGK	FALSE	13	P30046	NA_NA_NA_NA_NA_NA_NA_NA_NA_NA_NA_NA_NA_NA_NA	0.0033
575	498.813	2	-0.00100788	SRIPVQALL	FALSE	9	P36915	NA_NA_NA_NA_NA_NA_NA_NA_NA_NA_NA	0.0033
576	613.817	2	0.000709123	QRLKIMEYY	FALSE	9	P36543	pyrGlu_NA_NA_NA_NA_NA_NA_NA_NA_NA_NA	0.0033
577	599.358	2	-0.00131388	SRLWPKIQGL	FALSE	10	Q9NX09	NA_NA_NA_NA_NA_NA_NA_NA_NA_NA_NA_NA	0.0033
578	512.268	2	-0.000475385	SRFPTTMAL	FALSE	9	Q93084	NA_NA_NA_NA_NA_NA_NA_NA_NA_NA_NA	0.0033
579	516.287	2	0.00098612	ARNIFPSNL	FALSE	9	Q15758	NA_NA_NA_NA_NA_NA_NA_NA_NA_NA_NA	0.0032
580	681.32	2	0.00225662	HRFEQAFYTY	FALSE	10	Q5JPE7	NA_NA_NA_NA_NA_NA_NA_NA_NA_NA_NA_NA	0.0032
581	532.282	2	0.000871117	VRNAVTQEF	FALSE	9	Q99798	NA_NA_NA_NA_NA_NA_NA_NA_NA_NA_NA	0.0032
582	557.269	2	-0.00086038	SRFSLENNF	FALSE	9	P42224	NA_NA_NA_NA_NA_NA_NA_NA_NA_NA_NA	0.0032
583	629.815	2	-0.00172188	RQMAYVSGLSF	FALSE	11	Q96BI3	NA_NA_NA_NA_NA_NA_NA_NA_NA_NA_NA_NA_NA	0.0032
584	592.796	2	-0.00213188	ARVSLFQNCF	FALSE	10	O60306	NA_NA_NA_NA_NA_NA_NA_NA_NA_NA_NA_NA	0.0032
585	520.82	2	-0.000655383	GRVNLNVLR	FALSE	9	Q96AX1	NA_NA_NA_NA_NA_NA_NA_NA_NA_NA_NA	0.0035
586	631.343	2	-0.000894883	ERLEKFFHR	FALSE	9	P86790	NA_NA_NA_NA_NA_NA_NA_NA_NA_NA_NA	0.0035
587	562.795	2	0.00387012	YRSPPLATGY	FALSE	10	Q86U06	NA_NA_NA_NA_NA_NA_NA_NA_NA_NA_NA_NA	0.0035
588	557.803	2	-0.00137138	HRNLIEIGY	FALSE	9	Q13889	NA_NA_NA_NA_NA_NA_NA_NA_NA_NA_NA	0.0035
589	485.289	3	-0.00172793	YRFLPQKIIYL	FALSE	11	Q9UL46	NA_NA_NA_NA_NA_NA_NA_NA_NA_NA_NA_NA_NA	0.0035
591	434.263	3	-6.02603e-05	ARWLGTLDKKL	FALSE	11	Q9UFH2	NA_NA_NA_NA_NA_NA_NA_NA_NA_NA_NA_NA_NA	0.0035
592	573.302	2	3.86228e-05	HRYEVVTEL	FALSE	9	Q8NEL9	NA_NA_NA_NA_NA_NA_NA_NA_NA_NA_NA	0.0035
593	632.341	2	-0.00379188	QRYDSVINRL	FALSE	10	O94913	NA_NA_NA_NA_NA_NA_NA_NA_NA_NA_NA_NA	0.0035
594	452.891	3	0.00104873	ARFDSDVEVYR	FALSE	11	P01920	NA_NA_NA_NA_NA_NA_NA_NA_NA_NA_NA_NA_NA	0.0035
595	541.823	2	0.00146712	GRVFIIKSY	FALSE	9	Q7Z739	NA_NA_NA_NA_NA_NA_NA_NA_NA_NA_NA	0.0035
596	508.287	2	-0.000957384	LRFPGQLNA	FALSE	9	Q13509	NA_NA_NA_NA_NA_NA_NA_NA_NA_NA_NA	0.0035
597	731.397	2	-0.00484088	KRHNIYSNILGF	FALSE	12	P51003	NA_NA_NA_NA_NA_NA_NA_NA_NA_NA_NA_NA_NA_NA	0.0035
598	614.836	2	-0.00211088	HRVDLDILTF	FALSE	10	Q8N6I1	NA_NA_NA_NA_NA_NA_NA_NA_NA_NA_NA_NA	0.0035
599	607.838	2	-0.00315088	LRVDVDQLEK	FALSE	10	A8MT69	NA_NA_NA_NA_NA_NA_NA_NA_NA_NA_NA_NA	0.0035
600	531.824	2	-0.00100638	SRAVTIFIR	FALSE	9	P48643	NA_NA_NA_NA_NA_NA_NA_NA_NA_NA_NA	0.0035
601	587.817	2	-0.000121882	SRLDLIAQQM	FALSE	10	P36543	NA_NA_NA_NA_NA_NA_NA_NA_NA_NA_NA_NA	0.0034
602	385.554	3	0.000666072	RRWLPAGDAL	FALSE	10	P13639	NA_NA_NA_NA_NA_NA_NA_NA_NA_NA_NA_NA	0.0034
603	506.846	2	-0.00155038	ARVLLISKL	FALSE	9	P32248	NA_NA_NA_NA_NA_NA_NA_NA_NA_NA_NA	0.0034
604	557.768	2	-8.63818e-05	YQYGGLNSGR	FALSE	10	P62140	NA_NA_NA_NA_NA_NA_NA_NA_NA_NA_NA_NA	0.0034
605	579.785	2	-9.03849e-05	YRFLQTAEM	FALSE	9	Q9H0W8	NA_NA_NA_NA_NA_NA_NA_NA_NA_NA_NA	0.0034
606	486.768	2	-0.00114338	LRAAPVTGGM	FALSE	10	P18583	NA_NA_NA_NA_NA_NA_NA_NA_NA_NA_NA_NA	0.0034
607	568.832	2	-0.00143238	IRWIGQPPGL	FALSE	10	Q9NQC7	NA_NA_NA_NA_NA_NA_NA_NA_NA_NA_NA_NA	0.0034
608	595.799	2	-0.00282888	GRHDIAFVEF	FALSE	10	P09012	NA_NA_NA_NA_NA_NA_NA_NA_NA_NA_NA_NA	0.0034
609	592.31	2	-0.00117188	YRVKEIGSTM	FALSE	10	O00422	NA_NA_NA_NA_NA_NA_NA_NA_NA_NA_NA_NA	0.0034
610	713.89	2	-0.00613438	ASRLLLNNGAKMP	FALSE	13	P15121	Ac_NA_NA_NA_NA_NA_NA_NA_NA_NA_NA_NA_NA_NA_NA	0.0034
611	435.58	3	0.000828739	KRFGLNIDRW	FALSE	10	O43920	NA_NA_NA_NA_NA_NA_NA_NA_NA_NA_NA_NA	0.0034
612	582.335	2	0.000949618	MRLGSIFGLGL	FALSE	11	Q13200	NA_NA_NA_NA_NA_NA_NA_NA_NA_NA_NA_NA_NA	0.0034
613	557.289	2	0.000345616	TRYQGVNLY	FALSE	9	P11940	NA_NA_NA_NA_NA_NA_NA_NA_NA_NA_NA	0.0034
614	631.844	2	-0.00306838	RLAAAAAAAQSVY	FALSE	13	P07203	NA_NA_NA_NA_NA_NA_NA_NA_NA_NA_NA_NA_NA_NA_NA	0.0034
615	451.207	3	-0.000391925	YRHPWDDISY	FALSE	10	P53396	NA_NA_NA_NA_NA_NA_NA_NA_NA_NA_NA_NA	0.0033
616	576.317	2	-0.00773588	KRLDLTTSAF	FALSE	10	Q17RN3	NA_NA_NA_NA_NA_NA_NA_NA_NA_NA_NA_NA	0.0033
617	438.771	2	0.00183112	LATVLGRF	FALSE	8	P27708	NA_NA_NA_NA_NA_NA_NA_NA_NA_NA	0.0033
618	732.851	2	0.00614962	MEALSRAGQEMSL	FALSE	13	Q9NPI6	Ac_NA_NA_NA_NA_NA_NA_NA_NA_NA_NA_NA_NA_NA_NA	0.0033
619	527.764	2	-0.00236538	NAFKEITTM	FALSE	9	Q00403	NA_NA_NA_NA_NA_NA_NA_NA_NA_NA_NA	0.0033
620	410.252	3	-0.0002726	LRLDPNFLLK	FALSE	10	Q9BXW9	NA_NA_NA_NA_NA_NA_NA_NA_NA_NA_NA_NA	0.0033
621	561.804	2	-0.00291438	NRFAGFGIGLA	FALSE	11	Q96AG3	NA_NA_NA_NA_NA_NA_NA_NA_NA_NA_NA_NA_NA	0.0037
622	588.343	2	-0.000229377	ARIVAEEFLK	FALSE	10	P59998	NA_NA_NA_NA_NA_NA_NA_NA_NA_NA_NA_NA	0.0037
623	590.874	2	-0.00049688	QRVELLAKKI	FALSE	10	P26196	pyrGlu_NA_NA_NA_NA_NA_NA_NA_NA_NA_NA_NA	0.0037
624	405.237	3	0.00162941	GSGRIVGVQDLL	FALSE	12	O95163	NA_NA_NA_NA_NA_NA_NA_NA_NA_NA_NA_NA_NA_NA	0.0037
625	369.874	3	0.000204403	IRVPVNWSH	FALSE	9	Q14651	NA_NA_NA_NA_NA_NA_NA_NA_NA_NA_NA	0.0037
626	493.917	3	-0.00176526	ARLDHKFDLMYA	FALSE	12	P68363	NA_NA_NA_NA_NA_NA_NA_NA_NA_NA_NA_NA_NA_NA	0.0037
627	463.727	2	-0.00143238	SRNAGAFGF	FALSE	9	O60610	NA_NA_NA_NA_NA_NA_NA_NA_NA_NA_NA	0.0037
628	641.822	2	-0.00330088	RQIDLVDNYF	FALSE	10	Q9UPN9	NA_NA_NA_NA_NA_NA_NA_NA_NA_NA_NA_NA	0.0037
629	494.598	3	-0.00103227	KRFTPDIPTMLY	FALSE	12	Q9NRZ9	NA_NA_NA_NA_NA_NA_NA_NA_NA_NA_NA_NA_NA_NA	0.0037
630	548.283	2	-0.000771876	GRYQVSWSL	FALSE	9	P51571	NA_NA_NA_NA_NA_NA_NA_NA_NA_NA_NA	0.0037
631	571.286	2	-1.18844e-05	GRGAFGEATLY	FALSE	11	Q8TD19	NA_NA_NA_NA_NA_NA_NA_NA_NA_NA_NA_NA_NA	0.0037
632	556.299	2	-0.00180688	KRTLMQTSF	FALSE	9	Q14146	NA_NA_NA_NA_NA_NA_NA_NA_NA_NA_NA	0.0037
633	442.234	3	0.00131574	GRHSLYKMLGY	FALSE	11	Q9Y262	NA_NA_NA_NA_NA_NA_NA_NA_NA_NA_NA_NA_NA	0.0037
634	659.351	2	-0.00227138	QRLEGIVNKMF	FALSE	11	Q99460	pyrGlu_NA_NA_NA_NA_NA_NA_NA_NA_NA_NA_NA_NA	0.0037
635	495.282	2	-0.00387938	TRIGLETSL	FALSE	9	Q9Y230	NA_NA_NA_NA_NA_NA_NA_NA_NA_NA_NA	0.0037
636	547.296	2	-0.00298688	TRVDTILEF	FALSE	9	O14980	NA_NA_NA_NA_NA_NA_NA_NA_NA_NA_NA	0.0038
637	592.842	2	-0.00116238	MMPTPVILLK	FALSE	10	Q99832	Ac_NA_NA_NA_NA_NA_NA_NA_NA_NA_NA_NA	0.0038
638	569.27	2	-0.00164688	GRIDNVDAFM	FALSE	10	Q969L4	NA_NA_NA_NA_NA_NA_NA_NA_NA_NA_NA_NA	0.0038
640	513.289	2	-0.00239638	LRNIDNPAL	FALSE	9	O75083	NA_NA_NA_NA_NA_NA_NA_NA_NA_NA_NA	0.0038
641	513.778	2	-0.00055688	QRFGPPVSR	FALSE	9	Q14657	pyrGlu_NA_NA_NA_NA_NA_NA_NA_NA_NA_NA	0.0038
642	621.78	2	-0.00079338	ARFDGAEGSWF	FALSE	11	Q92888	NA_NA_NA_NA_NA_NA_NA_NA_NA_NA_NA_NA_NA	0.0038
643	549.344	2	3.66175e-05	KRNAVIGLNL	FALSE	10	Q07820	NA_NA_NA_NA_NA_NA_NA_NA_NA_NA_NA_NA	0.0038
644	461.922	3	-8.59251e-05	RRISGVDRYYV	FALSE	11	O15239	NA_NA_NA_NA_NA_NA_NA_NA_NA_NA_NA_NA_NA	0.0038
645	481.287	2	-0.00132188	TRTAVTSLL	FALSE	9	Q9P0M9	NA_NA_NA_NA_NA_NA_NA_NA_NA_NA_NA	0.0038
646	522.787	2	-0.000986381	IRNDVLDSL	FALSE	9	Q9UBE0	NA_NA_NA_NA_NA_NA_NA_NA_NA_NA_NA	0.0038
647	515.805	2	-0.00118288	FRIEGLAPK	FALSE	9	Q8N4H5	NA_NA_NA_NA_NA_NA_NA_NA_NA_NA_NA	0.0038
648	498.75	2	-0.000249884	ARMNLASSF	FALSE	9	Q13200	NA_NA_NA_NA_NA_NA_NA_NA_NA_NA_NA	0.0038
649	541.275	2	-0.00193188	ARNSVLMSGF	FALSE	10	Q01433	NA_NA_NA_NA_NA_NA_NA_NA_NA_NA_NA_NA	0.0038
650	522.315	2	0.000128623	NRLTKIEGL	FALSE	9	Q15435	NA_NA_NA_NA_NA_NA_NA_NA_NA_NA_NA	0.0038
651	567.82	2	0.00011012	KRLPPFETF	FALSE	9	Q15022	NA_NA_NA_NA_NA_NA_NA_NA_NA_NA_NA	0.0038
652	622.8	2	0.00216762	HRFYMIQSF	FALSE	9	O60563	NA_NA_NA_NA_NA_MetOX_NA_NA_NA_NA_NA	0.0038
653	478.903	3	0.000297403	LRYPNSHTHYF	FALSE	11	A5YKK6	NA_NA_NA_NA_NA_NA_NA_NA_NA_NA_NA_NA_NA	0.0037
654	534.84	2	0.00275112	LQILDQLLL	FALSE	9	Q9BV20	NA_NA_NA_NA_NA_NA_NA_NA_NA_NA_NA	0.0037
655	462.618	3	-0.00022626	RRLAVLPYELR	FALSE	11	Q9ULX3	NA_NA_NA_NA_NA_NA_NA_NA_NA_NA_NA_NA_NA	0.0037
656	573.803	2	0.00252862	GRLDNITQVM	FALSE	10	P58005	NA_NA_NA_NA_NA_NA_NA_NA_NA_NA_NA_NA	0.0037
657	353.242	3	0.000603738	SRLKSILKL	FALSE	9	Q9BRT6	NA_NA_NA_NA_NA_NA_NA_NA_NA_NA_NA	0.0037
658	582.839	2	-0.00215338	ARSSVVTAVKF	FALSE	11	Q86VP6	NA_NA_NA_NA_NA_NA_NA_NA_NA_NA_NA_NA_NA	0.0037
659	585.272	2	-0.00110338	SRVWWDSSF	FALSE	9	O43557	NA_NA_NA_NA_NA_NA_NA_NA_NA_NA_NA	0.0037
660	366.91	3	-0.000569929	ARLPLRLFL	FALSE	9	O00767	NA_NA_NA_NA_NA_NA_NA_NA_NA_NA_NA	0.0037
661	661.359	2	-0.000307383	ARTTIINEIQY	FALSE	11	O14802	NA_NA_NA_NA_NA_NA_NA_NA_NA_NA_NA_NA_NA	0.0037
662	385.862	3	0.000232404	HRHPDAFYL	FALSE	9	Q96EZ8	NA_NA_NA_NA_NA_NA_NA_NA_NA_NA_NA	0.0037
663	732.337	2	0.00162362	AANMYRVGDYVY	FALSE	12	O94776	Ac_NA_NA_NA_NA_NA_NA_NA_NA_NA_NA_NA_NA_NA	0.004
664	534.84	2	-0.00286538	ARLEILQLL	FALSE	9	Q96AZ6	NA_NA_NA_NA_NA_NA_NA_NA_NA_NA_NA	0.004
665	352.18	3	-0.0001316	GRMPFPVNH	FALSE	9	P09936	NA_NA_NA_NA_NA_NA_NA_NA_NA_NA_NA	0.004
666	438.911	3	1.37324e-05	LRHSEPSKLTF	FALSE	11	Q9UKM7	NA_NA_NA_NA_NA_NA_NA_NA_NA_NA_NA_NA_NA	0.004
667	477.276	3	-0.000957926	HRLEELYTKKL	FALSE	11	Q9UNM6	NA_NA_NA_NA_NA_NA_NA_NA_NA_NA_NA_NA_NA	0.004
668	658.344	2	0.00225062	ARLDWELEQR	FALSE	10	Q13769	NA_NA_NA_NA_NA_NA_NA_NA_NA_NA_NA_NA	0.004
669	375.546	3	-6.75984e-05	SRLPSYFVR	FALSE	9	Q7LBC6	NA_NA_NA_NA_NA_NA_NA_NA_NA_NA_NA	0.004
670	788.936	2	-0.00275338	KRDELTLEGIKQF	FALSE	13	P38919	NA_NA_NA_NA_NA_NA_NA_NA_NA_NA_NA_NA_NA_NA_NA	0.004
671	437.928	3	0.000628734	RRGDLPFVVPR	FALSE	11	P35579	NA_NA_NA_NA_NA_NA_NA_NA_NA_NA_NA_NA_NA	0.004
673	406.896	3	-0.00120026	HRFFTEILR	FALSE	9	Q8WVT3	NA_NA_NA_NA_NA_NA_NA_NA_NA_NA_NA	0.004
674	422.91	3	-0.00232793	QRYFDALLKL	FALSE	10	Q86VI3	NA_NA_NA_NA_NA_NA_NA_NA_NA_NA_NA_NA	0.004
675	362.573	3	-3.4596e-05	QRLTKLITL	FALSE	9	Q96JI7	NA_NA_NA_NA_NA_NA_NA_NA_NA_NA_NA	0.004
676	654.34	2	-0.00101738	IRWIGSDLSNF	FALSE	11	O75461	NA_NA_NA_NA_NA_NA_NA_NA_NA_NA_NA_NA_NA	0.004
677	578.362	2	-0.00299638	GRSQLILQKI	FALSE	10	Q7Z4L5	NA_NA_NA_NA_NA_NA_NA_NA_NA_NA_NA_NA	0.004
678	563.286	2	-0.00275388	VRNPYTGATF	FALSE	10	Q12851	NA_NA_NA_NA_NA_NA_NA_NA_NA_NA_NA_NA	0.004
679	682.82	2	0.00242412	GDHAWSFLKDF	FALSE	11	P12235	Ac_NA_NA_NA_NA_NA_NA_NA_NA_NA_NA_NA_NA	0.004
680	654.851	2	-0.00180388	IRLPYTASSGLM	FALSE	12	Q15904	NA_NA_NA_NA_NA_NA_NA_NA_NA_NA_NA_NA_NA_NA	0.0039
681	606.323	2	-0.00392138	TRLSLLNMTF	FALSE	10	Q9NVF7	NA_NA_NA_NA_NA_NA_NA_NA_MetOX_NA_NA_NA	0.0039
682	632.293	2	-0.000937378	FRYPQDYQF	FALSE	9	P43307	NA_NA_NA_NA_NA_NA_NA_NA_NA_NA_NA	0.0039
683	547.805	2	-0.000524875	SRFLTINIM	FALSE	9	Q4J6C6	NA_NA_NA_NA_NA_NA_NA_NA_NA_NA_NA	0.0039
686	551.289	2	0.000745624	GRWEAAEGLL	FALSE	10	O14579	NA_NA_NA_NA_NA_NA_NA_NA_NA_NA_NA_NA	0.0039
687	622.334	2	-0.00243188	IRNDEELNKL	FALSE	10	P16104	NA_NA_NA_NA_NA_NA_NA_NA_NA_NA_NA_NA	0.0039
688	492.796	2	0.000184619	ARAALQELL	FALSE	9	P62851	NA_NA_NA_NA_NA_NA_NA_NA_NA_NA_NA	0.0039
689	715.918	2	0.000941622	IEKLLNYAPLEK	FALSE	12	P62875	NA_NA_NA_NA_NA_NA_NA_NA_NA_NA_NA_NA_NA_NA	0.0039
690	370.546	3	2.07387e-05	ARAFNRIYV	FALSE	9	Q9UHX1	NA_NA_NA_NA_NA_NA_NA_NA_NA_NA_NA	0.0039
691	380.916	3	-0.000194927	RRLVGLASLR	FALSE	10	P35914	NA_NA_NA_NA_NA_NA_NA_NA_NA_NA_NA_NA	0.0039
692	409.236	3	-0.000610929	SRFLKSDLFL	FALSE	10	O43665	NA_NA_NA_NA_NA_NA_NA_NA_NA_NA_NA_NA	0.0039
693	639.346	2	-0.000300379	VRASNLQDLVY	FALSE	11	O95347	NA_NA_NA_NA_NA_NA_NA_NA_NA_NA_NA_NA_NA	0.004
694	381.882	3	-0.00248359	HRAQVIYTR	FALSE	9	P62851	NA_NA_NA_NA_NA_NA_NA_NA_NA_NA_NA	0.004
695	436.238	3	-0.000780263	ARFDSKDEILL	FALSE	11	Q10713	NA_NA_NA_NA_NA_NA_NA_NA_NA_NA_NA_NA_NA	0.004
696	466.29	2	-0.000768885	GRVVALLGF	FALSE	9	Q16611	NA_NA_NA_NA_NA_NA_NA_NA_NA_NA_NA	0.004
697	669.862	2	-0.000216881	IRIGANVSNFTF	FALSE	12	P04844	NA_NA_NA_NA_NA_NA_NA_NA_NA_NA_NA_NA_NA_NA	0.004
699	456.287	2	-0.000825877	GRSLPVLGL	FALSE	9	Q14728	NA_NA_NA_NA_NA_NA_NA_NA_NA_NA_NA	0.004
700	530.32	2	-0.00134288	GRLVKDMKI	FALSE	9	P15880	NA_NA_NA_NA_NA_NA_NA_NA_NA_NA_NA	0.004
701	559.813	2	-0.00170438	ERNVLIFDL	FALSE	9	P11142	NA_NA_NA_NA_NA_NA_NA_NA_NA_NA_NA	0.004
702	572.31	2	-0.00434138	YRYPIVLGY	FALSE	9	P21580	NA_NA_NA_NA_NA_NA_NA_NA_NA_NA_NA	0.004
703	553.802	2	-0.00164088	YRYPPGVVGV	FALSE	10	Q13363	NA_NA_NA_NA_NA_NA_NA_NA_NA_NA_NA_NA	0.004
704	638.853	2	-0.00330388	QRFIPELINF	FALSE	10	P78316	NA_NA_NA_NA_NA_NA_NA_NA_NA_NA_NA_NA	0.004
705	587.797	2	-0.00215538	ERLQYVFGY	FALSE	9	Q96MG7	NA_NA_NA_NA_NA_NA_NA_NA_NA_NA_NA	0.004
706	540.794	2	-0.00171538	GRVLFPATGY	FALSE	10	P49327	NA_NA_NA_NA_NA_NA_NA_NA_NA_NA_NA_NA	0.0041
707	489.276	2	0.000684117	GRIDYIAGL	FALSE	9	P07741	NA_NA_NA_NA_NA_NA_NA_NA_NA_NA_NA	0.0041
708	725.84	2	-0.00316788	KRYEKDFQSCF	FALSE	11	Q9NP50	NA_NA_NA_NA_NA_NA_NA_NA_NA_NA_NA_NA_NA	0.0041
709	460.254	2	0.000216616	GRIPSAVGY	FALSE	9	P06576	NA_NA_NA_NA_NA_NA_NA_NA_NA_NA_NA	0.0041
710	493.803	2	-0.00113988	GRSSIAGLLL	FALSE	10	Q15149	NA_NA_NA_NA_NA_NA_NA_NA_NA_NA_NA_NA	0.004
711	611.342	2	-0.00426888	KRLDYITAEI	FALSE	10	O15212	NA_NA_NA_NA_NA_NA_NA_NA_NA_NA_NA_NA	0.004
712	493.295	2	0.000860616	ASVRVVNQL	FALSE	9	O15381	NA_NA_NA_NA_NA_NA_NA_NA_NA_NA_NA	0.004
713	441.915	3	0.000657074	RRYQDAIRVF	FALSE	10	Q9Y262	NA_NA_NA_NA_NA_NA_NA_NA_NA_NA_NA_NA	0.004
714	546.306	2	0.000307117	MRLPSGKVGF	FALSE	10	Q9Y285	NA_NA_NA_NA_NA_NA_NA_NA_NA_NA_NA_NA	0.004
715	456.307	2	0.000781118	ARALLAALL	FALSE	9	O75629	NA_NA_NA_NA_NA_NA_NA_NA_NA_NA_NA	0.004
716	615.316	2	-0.00184288	ARILLDNDHY	FALSE	10	Q86WA8	NA_NA_NA_NA_NA_NA_NA_NA_NA_NA_NA_NA	0.004
717	517.292	2	-0.00163988	GRYQIINGL	FALSE	9	Q9NXE4	NA_NA_NA_NA_NA_NA_NA_NA_NA_NA_NA	0.004
718	512.77	2	-0.000631879	GRWHGEVAI	FALSE	9	Q6VAB6	NA_NA_NA_NA_NA_NA_NA_NA_NA_NA_NA	0.004
719	384.544	3	-0.000115259	HRIQELENL	FALSE	9	P51532	NA_NA_NA_NA_NA_NA_NA_NA_NA_NA_NA	0.004
720	627.371	2	0.00029012	RRLDSIVGPQL	FALSE	11	P86790	NA_NA_NA_NA_NA_NA_NA_NA_NA_NA_NA_NA_NA	0.004
721	607.812	2	-0.000693879	GRYGKATIEGY	FALSE	11	O95394	NA_NA_NA_NA_NA_NA_NA_NA_NA_NA_NA_NA_NA	0.0041
722	553.812	2	-0.00200438	SRLSIPTYGL	FALSE	10	P49327	NA_NA_NA_NA_NA_NA_NA_NA_NA_NA_NA_NA	0.0041
723	494.264	2	-0.000778381	ARSNVNVDL	FALSE	9	Q9NRY4	NA_NA_NA_NA_NA_NA_NA_NA_NA_NA_NA	0.0041
724	485.822	2	-0.000655885	ICLLLLLGL	FALSE	9	P10153	NA_NA_NA_NA_NA_NA_NA_NA_NA_NA_NA	0.0041
725	555.286	2	0.00213162	SRNEIIQSY	FALSE	9	O95402	NA_NA_NA_NA_NA_NA_NA_NA_NA_NA_NA	0.0041
726	582.854	2	0.000101124	HRWLKGGVVL	FALSE	10	P35613	NA_NA_NA_NA_NA_NA_NA_NA_NA_NA_NA_NA	0.0041
727	446.568	3	6.74075e-05	GRLAMEEIYQK	FALSE	11	Q8NHH9	NA_NA_NA_NA_NA_NA_NA_NA_NA_NA_NA_NA_NA	0.0041
728	472.771	2	-0.00098638	GRMIAGQVL	FALSE	9	P07910	NA_NA_NA_NA_NA_NA_NA_NA_NA_NA_NA	0.0041
729	426.235	3	-0.00080493	SRLGVAGQWRF	FALSE	11	P09936	NA_NA_NA_NA_NA_NA_NA_NA_NA_NA_NA_NA_NA	0.0041
731	581.807	2	-0.00231888	SRFDSPDLLL	FALSE	10	Q969U6	NA_NA_NA_NA_NA_NA_NA_NA_NA_NA_NA_NA	0.0041
732	528.303	2	-0.000806879	TRHPFLTAL	FALSE	9	P31751	NA_NA_NA_NA_NA_NA_NA_NA_NA_NA_NA	0.0041
733	582.758	2	-0.00301538	YRNPCYVSY	FALSE	9	Q9NYK1	NA_NA_NA_NA_NA_NA_NA_NA_NA_NA_NA	0.0041
734	589.758	2	-0.00223538	ARNPAMMQEM	FALSE	10	Q9UHD9	NA_NA_NA_NA_NA_NA_NA_NA_NA_NA_NA_NA	0.0041
735	450.762	2	0.000859116	VDIINAKQ	FALSE	8	P60174	NA_NA_NA_NA_NA_NA_NA_NA_NA_NA	0.0041
736	520.827	2	-0.000615375	QRIDLAVLL	FALSE	9	Q14157	NA_NA_NA_NA_NA_NA_NA_NA_NA_NA_NA	0.0041
738	513.291	2	-0.00742488	FSRRIYAL	FALSE	8	Q9P2Y5	NA_NA_NA_NA_NA_NA_NA_NA_NA_NA	0.0042
739	659.807	2	-0.000108878	GRFGYLEGQEY	FALSE	11	Q9HCG7	NA_NA_NA_NA_NA_NA_NA_NA_NA_NA_NA_NA_NA	0.0042
740	539.635	3	0.000695406	RRLQIEDFEARIA	FALSE	13	Q9P0J0	NA_NA_NA_NA_NA_NA_NA_NA_NA_NA_NA_NA_NA_NA_NA	0.0042
741	512.29	2	-0.000600379	HRAPPIIGY	FALSE	9	O15516	NA_NA_NA_NA_NA_NA_NA_NA_NA_NA_NA	0.0042
742	504.76	2	-0.00101388	SRNSSMLTL	FALSE	9	Q9UMW8	NA_NA_NA_NA_NA_NA_NA_NA_NA_NA_NA	0.0042
743	619.286	2	0.00021362	GRQQPMEGATY	FALSE	11	Q96DP5	NA_NA_NA_NA_NA_NA_NA_NA_NA_NA_NA_NA_NA	0.0042
744	561.279	2	-2.08826e-05	SRWQQGNVF	FALSE	9	P01857	NA_NA_NA_NA_NA_NA_NA_NA_NA_NA_NA	0.0042
745	564.793	2	-0.000903884	QRHADEFLL	FALSE	9	Q9BYC5	NA_NA_NA_NA_NA_NA_NA_NA_NA_NA_NA	0.0043
746	504.959	3	0.000400739	RRNLVESELQRL	FALSE	12	Q6P1N0	NA_NA_NA_NA_NA_NA_NA_NA_NA_NA_NA_NA_NA_NA	0.0043
747	577.32	2	-0.00279738	ARFLYKGEGL	FALSE	10	Q99418	NA_NA_NA_NA_NA_NA_NA_NA_NA_NA_NA_NA	0.0043
748	650.836	2	-0.00221138	YRYPSNLQLF	FALSE	10	Q99973	NA_NA_NA_NA_NA_NA_NA_NA_NA_NA_NA_NA	0.0043
749	443.899	3	0.000253402	SRYLNEKAVSY	FALSE	11	Q13492	NA_NA_NA_NA_NA_NA_NA_NA_NA_NA_NA_NA_NA	0.0043
750	531.607	3	-0.00273059	SRYPWHRFPVTF	FALSE	12	O60449	NA_NA_NA_NA_NA_NA_NA_NA_NA_NA_NA_NA_NA_NA	0.0043
751	530.793	2	-0.000572381	SRFQAEIPL	FALSE	9	Q6PJG2	NA_NA_NA_NA_NA_NA_NA_NA_NA_NA_NA	0.0043
752	497.783	2	0.000227117	LSLTYERL	FALSE	8	Q15904	NA_NA_NA_NA_NA_NA_NA_NA_NA_NA	0.0043
753	453.229	2	-0.000450876	GRMDGSLGL	FALSE	9	Q15751	NA_NA_NA_NA_NA_NA_NA_NA_NA_NA_NA	0.0043
754	683.364	2	0.00124962	KRFGFPEGSVEL	FALSE	12	P23396	NA_NA_NA_NA_NA_NA_NA_NA_NA_NA_NA_NA_NA_NA	0.0043
755	550.256	2	-0.00280538	GRDLTDYLM	FALSE	9	P60709	NA_NA_NA_NA_NA_NA_NA_NA_NA_MetOX_NA	0.0043
756	511.329	2	-0.00152488	GRHLLTVLL	FALSE	9	Q5T4S7	NA_NA_NA_NA_NA_NA_NA_NA_NA_NA_NA	0.0043
757	566.841	2	0.000677124	GQVAILLFKSG	FALSE	11	P63167	NA_NA_NA_NA_NA_NA_NA_NA_NA_NA_NA_NA_NA	0.0043
758	449.582	3	-0.000992927	RRWLGSAGLPSF	FALSE	12	Q8TDM0	NA_NA_NA_NA_NA_NA_NA_NA_NA_NA_NA_NA_NA_NA	0.0043
760	494.783	2	-0.00189288	ARLASLMNL	FALSE	9	P43243	NA_NA_NA_NA_NA_NA_NA_NA_NA_NA_NA	0.0043
761	492.783	2	-0.000239382	QRVGQAVNL	FALSE	9	Q9UBT7	NA_NA_NA_NA_NA_NA_NA_NA_NA_NA_NA	0.0043
762	444.599	3	-3.12638e-05	KRFNADNKLLL	FALSE	11	Q9NRZ9	NA_NA_NA_NA_NA_NA_NA_NA_NA_NA_NA_NA_NA	0.0043
763	625.322	2	-0.00258288	GRLDLPPGFMF	FALSE	11	O00499	NA_NA_NA_NA_NA_NA_NA_NA_NA_NA_NA_NA_NA	0.0043
764	458.92	3	-0.00291527	TRWAPGSVKPIY	FALSE	12	Q9NVS2	NA_NA_NA_NA_NA_NA_NA_NA_NA_NA_NA_NA_NA_NA	0.0044
765	657.38	2	0.00064512	IVPILEKMQDK	FALSE	11	Q13418	NA_NA_NA_NA_NA_NA_NA_NA_NA_NA_NA_NA_NA	0.0044
766	590.293	2	-0.000736383	ARWLTQEEF	FALSE	9	Q9UIF7	NA_NA_NA_NA_NA_NA_NA_NA_NA_NA_NA	0.0044
767	526.281	2	-0.00174038	GRTFPVDIF	FALSE	9	Q9H5Z1	NA_NA_NA_NA_NA_NA_NA_NA_NA_NA_NA	0.0044
768	491.3	2	0.00130612	IRAAPPPLF	FALSE	9	P10619	NA_NA_NA_NA_NA_NA_NA_NA_NA_NA_NA	0.0044
769	496.76	2	-0.00177188	ARFGSVNEL	FALSE	9	Q13129	NA_NA_NA_NA_NA_NA_NA_NA_NA_NA_NA	0.0044
770	376.534	3	0.000872074	NRYDGIYKV	FALSE	9	Q96PU4	NA_NA_NA_NA_NA_NA_NA_NA_NA_NA_NA	0.0044
771	512.782	2	-0.000607885	GRSAFIGIGF	FALSE	10	Q8NC96	NA_NA_NA_NA_NA_NA_NA_NA_NA_NA_NA_NA	0.0044
772	535.294	2	0.000660124	ARGDWPGVVL	FALSE	10	Q32P28	NA_NA_NA_NA_NA_NA_NA_NA_NA_NA_NA_NA	0.0044
773	453.921	3	-0.000285597	RRLVPDSDVRF	FALSE	11	P19367	NA_NA_NA_NA_NA_NA_NA_NA_NA_NA_NA_NA_NA	0.0044
774	560.792	2	-0.00295838	ARLPIQEYM	FALSE	9	Q6PF06	NA_NA_NA_NA_NA_NA_NA_NA_NA_NA_NA	0.0044
775	769.415	2	0.00359462	FSLPIKESEIIDF	FALSE	13	P15880	NA_NA_NA_NA_NA_NA_NA_NA_NA_NA_NA_NA_NA_NA_NA	0.0044
777	396.884	3	-0.000548932	HRLEELYTK	FALSE	9	Q9UNM6	NA_NA_NA_NA_NA_NA_NA_NA_NA_NA_NA	0.0045
778	532.762	2	2.71187e-05	QRYGPPPSY	FALSE	9	Q13435	NA_NA_NA_NA_NA_NA_NA_NA_NA_NA_NA	0.0045
779	493.803	2	-0.00123988	QRSLVALSL	FALSE	9	O95347	NA_NA_NA_NA_NA_NA_NA_NA_NA_NA_NA	0.0045
780	501.773	2	-0.00152538	GRNALEIVM	FALSE	9	A3KN83	NA_NA_NA_NA_NA_NA_NA_NA_NA_NA_NA	0.0045
782	627.332	2	0.00128112	IRISPTFADAY	FALSE	11	O15294	NA_NA_NA_NA_NA_NA_NA_NA_NA_NA_NA_NA_NA	0.0048
783	452.592	3	-0.000111933	HRFLLTPKVNM	FALSE	11	O75165	NA_NA_NA_NA_NA_NA_NA_NA_NA_NA_NA_NA_NA	0.0048
784	574.771	2	-0.00193638	FRFGESTTGF	FALSE	10	P49792	NA_NA_NA_NA_NA_NA_NA_NA_NA_NA_NA_NA	0.0048
786	579.335	2	-0.000935378	LRDNIQGITK	FALSE	10	P62805	NA_NA_NA_NA_NA_NA_NA_NA_NA_NA_NA_NA	0.0048
787	605.777	2	-0.00135038	HRYGDSEFTV	FALSE	10	P52597	NA_NA_NA_NA_NA_NA_NA_NA_NA_NA_NA_NA	0.0048
788	552.338	2	-0.000481384	KRLVVFDAR	FALSE	9	P53803	NA_NA_NA_NA_NA_NA_NA_NA_NA_NA_NA	0.0048
789	532.811	2	0.00217812	GRFKLTETL	FALSE	9	P42694	NA_NA_NA_NA_NA_NA_NA_NA_NA_NA_NA	0.0048
790	396.56	3	0.000211401	GRLPGAGGSLRF	FALSE	12	A2VDJ0	NA_NA_NA_NA_NA_NA_NA_NA_NA_NA_NA_NA_NA_NA	0.0048
791	620.857	2	0.000596123	KRLGVFGITSY	FALSE	11	Q86TI2	NA_NA_NA_NA_NA_NA_NA_NA_NA_NA_NA_NA_NA	0.0048
792	529.313	2	-0.00061738	VRNNVIIVM	FALSE	9	P42695	NA_NA_NA_NA_NA_NA_NA_NA_NA_NA_NA	0.0048
793	592.327	2	-0.000879377	YRFETVQKL	FALSE	9	Q99829	NA_NA_NA_NA_NA_NA_NA_NA_NA_NA_NA	0.0048
794	656.831	2	0.00116812	ARFMPGTIWSF	FALSE	11	Q0D2I5	NA_NA_NA_NA_NA_NA_NA_NA_NA_NA_NA_NA_NA	0.0048
796	557.277	2	-0.00128988	QRVFPHAEF	FALSE	9	Q6PL18	pyrGlu_NA_NA_NA_NA_NA_NA_NA_NA_NA_NA	0.0048
797	351.546	3	0.000332405	QRTSLIVHV	FALSE	9	Q15072	NA_NA_NA_NA_NA_NA_NA_NA_NA_NA_NA	0.0048
798	680.317	2	-0.00476788	QRSSVQEFMTF	FALSE	11	O15498	NA_NA_NA_NA_NA_NA_NA_NA_NA_NA_NA_NA_NA	0.0048
799	577.288	2	0.00218812	ARFSPDGQYL	FALSE	10	Q2TAY7	NA_NA_NA_NA_NA_NA_NA_NA_NA_NA_NA_NA	0.0048
800	536.256	2	-0.00356238	SRGDFVVEY	FALSE	9	Q9NQR1	NA_NA_NA_NA_NA_NA_NA_NA_NA_NA_NA	0.0048
801	566.826	2	-0.00174738	YRAQQIIQL	FALSE	9	Q9BX59	NA_NA_NA_NA_NA_NA_NA_NA_NA_NA_NA	0.0048
802	553.817	2	-0.00262088	IRFSNISAAK	FALSE	10	P50991	NA_NA_NA_NA_NA_NA_NA_NA_NA_NA_NA_NA	0.0048
803	508.31	2	-0.00199738	SRLDSVLLL	FALSE	9	Q13868	NA_NA_NA_NA_NA_NA_NA_NA_NA_NA_NA	0.0048
804	631.356	2	-0.00255688	LRYPMAVGLNK	FALSE	11	Q9Y3U8	NA_NA_NA_NA_NA_NA_NA_NA_NA_NA_NA_NA_NA	0.0048
805	450.93	3	-0.000257927	IRDTNSIKYKL	FALSE	11	Q8TEQ6	NA_NA_NA_NA_NA_NA_NA_NA_NA_NA_NA_NA_NA	0.0048
806	586.313	2	0.00140212	FRLDTPLYF	FALSE	9	Q32P28	NA_NA_NA_NA_NA_NA_NA_NA_NA_NA_NA	0.0048
807	475.757	2	-0.000389876	SRAGIATQF	FALSE	9	Q9UQR1	NA_NA_NA_NA_NA_NA_NA_NA_NA_NA_NA	0.0048
808	484.797	2	-0.00175788	SRLPQLVGV	FALSE	9	P15291	NA_NA_NA_NA_NA_NA_NA_NA_NA_NA_NA	0.0048
809	384.922	3	0.000865405	IRIQLPVVSK	FALSE	10	P46013	NA_NA_NA_NA_NA_NA_NA_NA_NA_NA_NA_NA	0.0048
810	493.776	2	0.00111762	GRLPSSWAL	FALSE	9	Q8TB96	NA_NA_NA_NA_NA_NA_NA_NA_NA_NA_NA	0.0048
811	404.925	3	0.000220737	RRLALFPGVAL	FALSE	11	P30101	NA_NA_NA_NA_NA_NA_NA_NA_NA_NA_NA_NA_NA	0.0048
812	704.357	2	0.000558621	KRMNPNSPSITY	FALSE	12	P84090	NA_NA_NA_NA_NA_NA_NA_NA_NA_NA_NA_NA_NA_NA	0.0049
814	634.853	2	-0.00116088	SRFFDKVIEK	FALSE	10	Q5HYI8	NA_NA_NA_NA_NA_NA_NA_NA_NA_NA_NA_NA	0.0049
815	527.269	2	-0.00287288	GRSYPVEVF	FALSE	9	Q7Z478	NA_NA_NA_NA_NA_NA_NA_NA_NA_NA_NA	0.0049
816	524.81	2	-0.00126488	QRSLVLFSV	FALSE	9	O15503	NA_NA_NA_NA_NA_NA_NA_NA_NA_NA_NA	0.0049
817	535.945	3	-0.00198227	RRVWVSENFQER	FALSE	12	Q9Y4A5	NA_NA_NA_NA_NA_NA_NA_NA_NA_NA_NA_NA_NA_NA	0.0048
818	679.361	2	0.00179112	AAQGEPQVQFKL	FALSE	12	P62826	Ac_NA_NA_NA_NA_NA_NA_NA_NA_NA_NA_NA_NA_NA	0.0048
819	398.554	3	0.000677403	IRAFPNKQGY	FALSE	10	O43684	NA_NA_NA_NA_NA_NA_NA_NA_NA_NA_NA_NA	0.0048
820	450.918	3	-0.000475592	ARFNDLRFVGR	FALSE	11	Q13950	NA_NA_NA_NA_NA_NA_NA_NA_NA_NA_NA_NA_NA	0.0048
821	683.846	2	-0.000898879	RRWDDSQKYL	FALSE	10	Q16543	NA_NA_NA_NA_NA_NA_NA_NA_NA_NA_NA_NA	0.0048
822	488.755	2	0.00114962	ARNPPGFAF	FALSE	9	Q16629	NA_NA_NA_NA_NA_NA_NA_NA_NA_NA_NA	0.0048
823	675.808	2	-0.00373588	SRFFPYTSSQM	FALSE	11	O75925	NA_NA_NA_NA_NA_NA_NA_NA_NA_NA_NA_NA_NA	0.0048
824	397.562	3	-4.1599e-05	GRIKEIFCPK	FALSE	10	P26358	NA_NA_NA_NA_NA_NA_NA_NA_NA_NA_NA_NA	0.0048
825	601.341	2	0.000410623	LRYLNFFTK	FALSE	9	P12004	NA_NA_NA_NA_NA_NA_NA_NA_NA_NA_NA	0.0048
826	568.324	2	-0.00387888	LRTYLVGNSL	FALSE	10	P07814	NA_NA_NA_NA_NA_NA_NA_NA_NA_NA_NA_NA	0.0048
827	554.821	2	-0.00122938	GRSSVILLTY	FALSE	10	Q96BI1	NA_NA_NA_NA_NA_NA_NA_NA_NA_NA_NA_NA	0.0048
828	516.796	2	0.000385124	TRNPLVAVY	FALSE	9	Q9UNE7	NA_NA_NA_NA_NA_NA_NA_NA_NA_NA_NA	0.0048
832	380.541	3	0.000329735	SRTSVTDVKF	FALSE	10	Q96EE3	NA_NA_NA_NA_NA_NA_NA_NA_NA_NA_NA_NA	0.0048
833	736.918	2	0.00100712	ALTNGIYPHKLVF	FALSE	13	Q02878	NA_NA_NA_NA_NA_NA_NA_NA_NA_NA_NA_NA_NA_NA_NA	0.0048
834	543.335	2	-0.00274688	ARVSLKDLAL	FALSE	10	Q8WTP8	NA_NA_NA_NA_NA_NA_NA_NA_NA_NA_NA_NA	0.0048
835	482.309	2	-0.00705238	LVPGGPVLLV	FALSE	10	Q96DZ1	NA_NA_NA_NA_NA_NA_NA_NA_NA_NA_NA_NA	0.0048
836	464.782	2	-0.00100738	ARNLTALGL	FALSE	9	P31939	NA_NA_NA_NA_NA_NA_NA_NA_NA_NA_NA	0.0048
837	539.796	2	-0.00265388	SRLEFINSI	FALSE	9	Q15782	NA_NA_NA_NA_NA_NA_NA_NA_NA_NA_NA	0.0048
838	530.315	2	-0.000325884	SRTMLLPLL	FALSE	9	Q32NB8	NA_NA_NA_NA_MetOX_NA_NA_NA_NA_NA_NA	0.0048
839	535.841	2	0.000574624	VRLPPITKF	FALSE	9	Q8NI36	NA_NA_NA_NA_NA_NA_NA_NA_NA_NA_NA	0.0048
840	370.886	3	-0.000312597	TRTGLFLRF	FALSE	9	Q9NX02	NA_NA_NA_NA_NA_NA_NA_NA_NA_NA_NA	0.0048
841	485.824	2	-0.000375377	GRLLGIITK	FALSE	9	P51790	NA_NA_NA_NA_NA_NA_NA_NA_NA_NA_NA	0.0048
843	486.257	2	-0.00134288	GRMPGQLNV	FALSE	9	Q13423	NA_NA_NA_NA_NA_NA_NA_NA_NA_NA_NA	0.0048
844	445.598	3	0.000213739	ARALFIRPFML	FALSE	11	Q9UG63	NA_NA_NA_NA_NA_NA_NA_NA_NA_NA_NA_NA_NA	0.0048
845	488.93	3	-0.00170493	ARLALSPVPSHWM	FALSE	13	P40259	NA_NA_NA_NA_NA_NA_NA_NA_NA_NA_NA_NA_NA_NA_NA	0.0048
846	560.826	2	-0.00204588	SRLKALNATF	FALSE	10	O95219	NA_NA_NA_NA_NA_NA_NA_NA_NA_NA_NA_NA	0.0048
848	521.838	2	-0.00305638	ARTSLLLLR	FALSE	9	Q9HB65	NA_NA_NA_NA_NA_NA_NA_NA_NA_NA_NA	0.0048
849	601.867	2	-7.13758e-05	KRILGLLENF	FALSE	10	Q8WYA6	NA_NA_NA_NA_NA_NA_NA_NA_NA_NA_NA_NA	0.0048
850	518.294	2	-0.00204738	TRADLIFTV	FALSE	9	Q14204	NA_NA_NA_NA_NA_NA_NA_NA_NA_NA_NA	0.0048
851	367.559	3	-2.02616e-05	LRMAIQQKL	FALSE	9	Q8TD16	NA_NA_NA_NA_NA_NA_NA_NA_NA_NA_NA	0.0048
852	500.259	3	0.000419408	RRMEVYNEFVR	FALSE	11	Q13206	NA_NA_NA_NA_NA_NA_NA_NA_NA_NA_NA_NA_NA	0.0047
853	434.887	3	-0.00179426	SRLSAMKEFAY	FALSE	11	Q9BVS4	NA_NA_NA_NA_NA_NA_NA_NA_NA_NA_NA_NA_NA	0.0047
854	447.267	3	-0.000716927	VRHSLKDILMK	FALSE	11	Q92576	NA_NA_NA_NA_NA_NA_NA_NA_NA_NA_NA_NA_NA	0.0047
855	534.315	2	0.000228123	QRLSQLLNL	FALSE	9	Q92673	pyrGlu_NA_NA_NA_NA_NA_NA_NA_NA_NA_NA	0.0047
856	500.813	2	0.00123512	GRTELAIKL	FALSE	9	Q9H269	NA_NA_NA_NA_NA_NA_NA_NA_NA_NA_NA	0.0047
857	502.798	2	-0.000757876	GRTFLLQGL	FALSE	9	P49411	NA_NA_NA_NA_NA_NA_NA_NA_NA_NA_NA	0.0047
858	522.317	2	-0.00136888	MTRALLPLL	FALSE	9	Q9H3Z7	NA_MetOX_NA_NA_NA_NA_NA_NA_NA_NA_NA	0.0047
860	536.818	2	-0.00129338	WRFPGLLLA	FALSE	9	P15529	NA_NA_NA_NA_NA_NA_NA_NA_NA_NA_NA	0.0047
862	410.243	3	-0.00078826	IRHTVNKITF	FALSE	10	O14641	NA_NA_NA_NA_NA_NA_NA_NA_NA_NA_NA_NA	0.0047
863	512.305	2	0.00142412	GRIVTIFAF	FALSE	9	Q16548	NA_NA_NA_NA_NA_NA_NA_NA_NA_NA_NA	0.0047
864	550.325	2	0.00283762	GIEKENLAIL	FALSE	10	Q8WVN8	NA_NA_NA_NA_NA_NA_NA_NA_NA_NA_NA_NA	0.0047
865	507.79	2	0.00013612	ELEGVILEL	FALSE	9	Q59EK9	NA_NA_NA_NA_NA_NA_NA_NA_NA_NA_NA	0.0047
866	552.304	2	-0.00169338	ARMAQPIVAF	FALSE	10	O60306	NA_NA_NA_NA_NA_NA_NA_NA_NA_NA_NA_NA	0.0047
867	471.789	2	0.00378462	NLVGVTINI	FALSE	9	Q9BZQ6	NA_NA_NA_NA_NA_NA_NA_NA_NA_NA_NA	0.0047
868	500.29	2	-0.000499876	SRILHGLGF	FALSE	9	Q9UG63	NA_NA_NA_NA_NA_NA_NA_NA_NA_NA_NA	0.0047
869	623.832	2	-0.00426488	ATDELATKLSR	FALSE	11	Q96C19	Ac_NA_NA_NA_NA_NA_NA_NA_NA_NA_NA_NA_NA	0.0048
870	703.814	2	0.00243212	GRNQDFMNVYY	FALSE	11	Q9UPT5	NA_NA_NA_NA_NA_NA_NA_NA_NA_NA_NA_NA_NA	0.0048
871	364.21	3	-0.000407927	SRLFPPAFR	FALSE	9	Q4ZIN3	NA_NA_NA_NA_NA_NA_NA_NA_NA_NA_NA	0.0048
872	531.766	2	-0.00133188	GRMPNLMLM	FALSE	9	P42336	NA_NA_NA_NA_NA_NA_NA_NA_NA_NA_NA	0.0048
873	511.767	2	-0.000853876	SRTSVQPTF	FALSE	9	Q5T4S7	NA_NA_NA_NA_NA_NA_NA_NA_NA_NA_NA	0.0048
874	518.832	2	0.00194262	IRNIPIPTL	FALSE	9	P28289	NA_NA_NA_NA_NA_NA_NA_NA_NA_NA_NA	0.0048
875	528.348	2	-0.00335738	KRADVLLLK	FALSE	9	Q6P047	NA_NA_NA_NA_NA_NA_NA_NA_NA_NA_NA	0.0048
876	609.322	2	-0.00136088	QRFAQAQQQL	FALSE	10	P32970	NA_NA_NA_NA_NA_NA_NA_NA_NA_NA_NA_NA	0.0048
877	382.933	3	-0.000185926	HRLLLLLLR	FALSE	9	P57087	NA_NA_NA_NA_NA_NA_NA_NA_NA_NA_NA	0.0047
878	371.557	3	0.000444739	ARIDGNLVVR	FALSE	10	P00387	NA_NA_NA_NA_NA_NA_NA_NA_NA_NA_NA_NA	0.0047
879	525.293	2	0.00170312	ARVSIVNQY	FALSE	9	Q9GZR2	NA_NA_NA_NA_NA_NA_NA_NA_NA_NA_NA	0.0047
880	545.798	2	0.00307662	SEKQMLLEI	FALSE	9	Q9Y5F2	NA_NA_NA_NA_NA_NA_NA_NA_NA_NA_NA	0.0047
881	519.756	2	-0.000233377	GRDGYMGIGL	FALSE	10	Q96S59	NA_NA_NA_NA_NA_NA_NA_NA_NA_NA_NA_NA	0.0047
882	606.82	2	-0.00276138	SRYQGVNLYI	FALSE	10	Q13310	NA_NA_NA_NA_NA_NA_NA_NA_NA_NA_NA_NA	0.0047
883	695.88	2	0.00250162	FSLPIKESEIID	FALSE	12	P15880	NA_NA_NA_NA_NA_NA_NA_NA_NA_NA_NA_NA_NA_NA	0.0047
884	519.806	2	-0.000913878	ARHSLLQTL	FALSE	9	P46060	NA_NA_NA_NA_NA_NA_NA_NA_NA_NA_NA	0.0047
885	485.806	2	-0.000582376	IRNLGIVSV	FALSE	9	Q7Z2T5	NA_NA_NA_NA_NA_NA_NA_NA_NA_NA_NA	0.0047
887	496.282	2	-0.000740379	GRIEILSGF	FALSE	9	Q8TAD4	NA_NA_NA_NA_NA_NA_NA_NA_NA_NA_NA	0.0047
888	528.33	2	0.00295212	DVKILANGLL	FALSE	10	Q9Y5C1	NA_NA_NA_NA_NA_NA_NA_NA_NA_NA_NA_NA	0.0047
889	542.267	2	-0.00217638	GRLYCPVEF	FALSE	9	P52788	NA_NA_NA_NA_NA_NA_NA_NA_NA_NA_NA	0.0047
890	526.796	2	-0.00245738	SRNLFVLGF	FALSE	9	Q9UGH3	NA_NA_NA_NA_NA_NA_NA_NA_NA_NA_NA	0.0047
891	418.24	3	-0.000244259	ERLKDLFGKF	FALSE	10	P11940;Q9H361	NA_NA_NA_NA_NA_NA_NA_NA_NA_NA_NA_NA	0.0052
892	729.335	2	-0.00176038	SRFEDNEELRY	FALSE	11	Q3T906	NA_NA_NA_NA_NA_NA_NA_NA_NA_NA_NA_NA_NA	0.0052
893	360.217	3	-0.000951266	GRIPGPGTPVK	FALSE	11	Q9Y3P8	NA_NA_NA_NA_NA_NA_NA_NA_NA_NA_NA_NA_NA	0.0052
894	521.289	2	0.000546124	SRDPVQLNL	FALSE	9	Q9Y490	NA_NA_NA_NA_NA_NA_NA_NA_NA_NA_NA	0.0052
895	532.797	2	-0.00354288	SRFLIINAM	FALSE	9	Q9NZS9	NA_NA_NA_NA_NA_NA_NA_NA_NA_NA_NA	0.0052
896	531.281	2	0.000268123	HRFPFSSAL	FALSE	9	Q9NQ11	NA_NA_NA_NA_NA_NA_NA_NA_NA_NA_NA	0.0052
897	524.337	2	-0.000349884	KRASVFVKL	FALSE	9	P50502	NA_NA_NA_NA_NA_NA_NA_NA_NA_NA_NA	0.0052
898	511.27	2	-0.00141538	SRLGEIISM	FALSE	9	Q9H845	NA_NA_NA_NA_NA_NA_NA_NA_NA_MetOX_NA	0.0052
899	636.304	2	-0.00324388	ERWDNLIYY	FALSE	9	Q15269	NA_NA_NA_NA_NA_NA_NA_NA_NA_NA_NA	0.0052
900	486.3	2	0.00111012	SRSPVVITI	FALSE	9	Q9NS56	NA_NA_NA_NA_NA_NA_NA_NA_NA_NA_NA	0.0052
901	524.796	2	0.00071612	AGWGALLFTL	FALSE	10	Q8N661	NA_NA_NA_NA_NA_NA_NA_NA_NA_NA_NA_NA	0.0052
902	651.356	2	0.00157112	KRFLGSGGFIGY	FALSE	12	Q02809	NA_NA_NA_NA_NA_NA_NA_NA_NA_NA_NA_NA_NA_NA	0.0052
903	563.339	2	-0.00182188	QRQQVQILL	FALSE	9	Q03001	NA_NA_NA_NA_NA_NA_NA_NA_NA_NA_NA	0.0052
904	664.842	2	-0.00460138	SRFGNAFLNRF	FALSE	11	Q9H223	NA_NA_NA_NA_NA_NA_NA_NA_NA_NA_NA_NA_NA	0.0052
905	476.261	3	0.00116074	FRVPFIYGHKY	FALSE	11	Q9NZ01	NA_NA_NA_NA_NA_NA_NA_NA_NA_NA_NA_NA_NA	0.0052
906	555.85	2	0.00125262	KRLEEIPLI	FALSE	9	Q14152	NA_NA_NA_NA_NA_NA_NA_NA_NA_NA_NA	0.0052
907	634.357	2	-0.00485338	GRFGTKGLAITF	FALSE	12	Q13838	NA_NA_NA_NA_NA_NA_NA_NA_NA_NA_NA_NA_NA_NA	0.0052
908	629.319	2	-0.000297381	ARFSPGMSILY	FALSE	11	P20023	NA_NA_NA_NA_NA_NA_NA_MetOX_NA_NA_NA_NA_NA	0.0052
909	469.793	2	0.000224117	ARLGGIPVGV	FALSE	10	O00763	NA_NA_NA_NA_NA_NA_NA_NA_NA_NA_NA_NA	0.0052
910	513.274	2	-0.00121538	ARFFGIDSL	FALSE	9	Q7L273	NA_NA_NA_NA_NA_NA_NA_NA_NA_NA_NA	0.0052
911	680.423	2	-0.00422738	FRQKLLNLISK	FALSE	11	Q13794	NA_NA_NA_NA_NA_NA_NA_NA_NA_NA_NA_NA_NA	0.0052
912	390.563	3	0.00209374	NRIVYLYTK	FALSE	9	P49207	NA_NA_NA_NA_NA_NA_NA_NA_NA_NA_NA	0.0052
913	530.31	2	-0.00424088	PIHQELPLL	FALSE	9	A8MUL9	NA_NA_NA_NA_NA_NA_NA_NA_NA_NA_NA	0.0052
914	500.799	2	-0.00210038	ARFPGNLLL	FALSE	9	Q9Y4C2	NA_NA_NA_NA_NA_NA_NA_NA_NA_NA_NA	0.0052
915	538.832	2	-0.000831378	IRHPNIITL	FALSE	9	O43293	NA_NA_NA_NA_NA_NA_NA_NA_NA_NA_NA	0.0054
916	534.279	2	-0.000997883	GRYPSVIEF	FALSE	9	Q8WYB5	NA_NA_NA_NA_NA_NA_NA_NA_NA_NA_NA	0.0054
917	493.805	2	0.00106012	GRSLIQISI	FALSE	9	Q8TCU6	NA_NA_NA_NA_NA_NA_NA_NA_NA_NA_NA	0.0054
918	499.277	2	-0.000257879	SRGFFATLV	FALSE	9	P49588	NA_NA_NA_NA_NA_NA_NA_NA_NA_NA_NA	0.0054
919	533.289	2	0.000846117	KRADLQSTF	FALSE	9	Q7L590	NA_NA_NA_NA_NA_NA_NA_NA_NA_NA_NA	0.0054
920	389.904	3	-0.000354935	RRLDLPIER	FALSE	9	P17812	NA_NA_NA_NA_NA_NA_NA_NA_NA_NA_NA	0.0054
922	542.277	2	-0.00214038	ERMGYTITL	FALSE	9	Q96JI7	NA_NA_NA_NA_NA_NA_NA_NA_NA_NA_NA	0.0055
923	406.477	4	0.0017568	GRFLLNNDKNIRY	FALSE	13	O43747	NA_NA_NA_NA_NA_NA_NA_NA_NA_NA_NA_NA_NA_NA_NA	0.0055
924	571.783	2	-0.00192088	ERHNLITEM	FALSE	9	Q15637	NA_NA_NA_NA_NA_NA_NA_NA_NA_NA_NA	0.0055
925	523.292	2	-0.00213938	SRIPFNQAL	FALSE	9	Q9UHI6	NA_NA_NA_NA_NA_NA_NA_NA_NA_NA_NA	0.0055
926	548.793	2	-0.00215788	SRVLIFSQM	FALSE	9	O60264	NA_NA_NA_NA_NA_NA_NA_NA_NA_MetOX_NA	0.0055
927	530.309	2	-0.000166881	CRRGILQTL	FALSE	9	Q9BY78	NA_NA_NA_NA_NA_NA_NA_NA_NA_NA_NA	0.0055
928	518.271	2	-0.00170688	GRNFWVSGL	FALSE	9	Q15424	NA_NA_NA_NA_NA_NA_NA_NA_NA_NA_NA	0.0055
929	595.783	2	-0.00113538	SRFNFDNKY	FALSE	9	A3KN83	NA_NA_NA_NA_NA_NA_NA_NA_NA_NA_NA	0.0055
930	514.809	2	0.000377625	EQVLGIRLT	FALSE	9	Q92925	NA_NA_NA_NA_NA_NA_NA_NA_NA_NA_NA	0.0055
931	535.793	2	-0.00271188	SRLPEQVEL	FALSE	9	Q96AD5	NA_NA_NA_NA_NA_NA_NA_NA_NA_NA_NA	0.0055
932	501.289	2	-0.00169638	ARNTVTQVL	FALSE	9	Q9P2B4	NA_NA_NA_NA_NA_NA_NA_NA_NA_NA_NA	0.0055
934	542.809	2	-0.00286488	ARWELPLTV	FALSE	9	Q7Z7A3	NA_NA_NA_NA_NA_NA_NA_NA_NA_NA_NA	0.0055
935	577.268	2	0.000481621	SRHLDSYEF	FALSE	9	Q13352	NA_NA_NA_NA_NA_NA_NA_NA_NA_NA_NA	0.0055
936	685.341	2	-0.00229988	ARLEETTGSKMF	FALSE	12	Q9BQC3	NA_NA_NA_NA_NA_NA_NA_NA_NA_NA_NA_NA_NA_NA	0.0058
938	481.951	3	0.000635075	GRIMLKGDNITLL	FALSE	13	P62304	NA_NA_NA_NA_NA_NA_NA_NA_NA_NA_NA_NA_NA_NA_NA	0.0058
940	391.57	3	-7.59914e-06	ARLKDALVRM	FALSE	10	Q14203	NA_NA_NA_NA_NA_NA_NA_NA_NA_NA_NA_NA	0.0058
942	539.329	2	-0.00185638	GRLSPVPVPR	FALSE	10	Q9UKM9	NA_NA_NA_NA_NA_NA_NA_NA_NA_NA_NA_NA	0.0058
943	392.554	3	0.000654732	FRYNGLIHR	FALSE	9	P46779	NA_NA_NA_NA_NA_NA_NA_NA_NA_NA_NA	0.0058
944	672.812	2	-0.00313238	TRNWFTDLEY	FALSE	10	Q86UE3	NA_NA_NA_NA_NA_NA_NA_NA_NA_NA_NA_NA	0.0058
945	558.809	2	0.00103462	ARADLIEVVM	FALSE	10	Q8IXQ6	NA_NA_NA_NA_NA_NA_NA_NA_NA_NA_NA_NA	0.0058
946	804.419	2	-0.00321688	ARLDHKFDLMYAK	FALSE	13	P68363	NA_NA_NA_NA_NA_NA_NA_NA_NA_NA_NA_NA_NA_NA_NA	0.006
947	634.336	2	-0.00234388	ARYPDTIALTF	FALSE	11	O60336	NA_NA_NA_NA_NA_NA_NA_NA_NA_NA_NA_NA_NA	0.0059
948	592.879	2	0.00264912	MRLSLPLLLL	FALSE	10	Q8WU39	NA_MetOX_NA_NA_NA_NA_NA_NA_NA_NA_NA_NA	0.0059
949	499.808	2	-0.00145688	RRDVGVIAL	FALSE	9	Q15040	NA_NA_NA_NA_NA_NA_NA_NA_NA_NA_NA	0.0059
950	525.802	2	0.000202619	KRTLIAEGY	FALSE	9	Q70SY1	NA_NA_NA_NA_NA_NA_NA_NA_NA_NA_NA	0.0059
951	527.82	2	-0.00226488	GRVQQIQLL	FALSE	9	Q9HD26	NA_NA_NA_NA_NA_NA_NA_NA_NA_NA_NA	0.0059
952	467.3	3	0.00130641	ARHGLPLLPLLSL	FALSE	13	Q8NBJ7	NA_NA_NA_NA_NA_NA_NA_NA_NA_NA_NA_NA_NA_NA_NA	0.0059
953	621.364	2	-0.00119288	KRQEEVINLL	FALSE	10	Q7Z4L5	NA_NA_NA_NA_NA_NA_NA_NA_NA_NA_NA_NA	0.0059
954	514.764	2	-0.000157377	MRDPVSPNL	FALSE	9	O75530-2	NA_NA_NA_NA_NA_NA_NA_NA_NA_NA_NA	0.0059
955	541.798	2	-0.00402838	HRTLLEGSGL	FALSE	10	P49327	NA_NA_NA_NA_NA_NA_NA_NA_NA_NA_NA_NA	0.0059
956	538.335	2	-0.000307383	VRVKLVSAGF	FALSE	10	O43502	NA_NA_NA_NA_NA_NA_NA_NA_NA_NA_NA_NA	0.0059
957	546.793	2	-0.00271488	NRFLFPEGI	FALSE	9	Q3SY69	NA_NA_NA_NA_NA_NA_NA_NA_NA_NA_NA	0.0059
958	582.823	2	-0.00167238	GRTFPVDILF	FALSE	10	Q92620	NA_NA_NA_NA_NA_NA_NA_NA_NA_NA_NA_NA	0.0059
959	593.31	2	-0.00236388	GRVGFFPRSY	FALSE	10	Q13588	NA_NA_NA_NA_NA_NA_NA_NA_NA_NA_NA_NA	0.0059
960	536.292	2	-0.00257088	ARHLMTLVM	FALSE	9	P30566	NA_NA_NA_NA_NA_NA_NA_NA_NA_NA_NA	0.0059
961	488.764	2	-0.00101438	ARVPVNSSF	FALSE	9	Q92545	NA_NA_NA_NA_NA_NA_NA_NA_NA_NA_NA	0.0059
963	518.829	2	0.00475862	AQALLPLTPI	FALSE	10	Q14112	NA_NA_NA_NA_NA_NA_NA_NA_NA_NA_NA_NA	0.0059
964	634.851	2	-0.00276088	KRYDNVTILF	FALSE	10	Q02153	NA_NA_NA_NA_NA_NA_NA_NA_NA_NA_NA_NA	0.0059
965	424.226	3	-0.000741261	ARSMVSTIMKF	FALSE	11	Q9NR09	NA_NA_NA_NA_NA_NA_NA_NA_NA_NA_NA_NA_NA	0.0061
967	502.796	2	-0.00215838	QRAAIILGY	FALSE	9	Q9HCM3	NA_NA_NA_NA_NA_NA_NA_NA_NA_NA_NA	0.0061
968	561.31	2	-0.00107488	QRMNFLVTL	FALSE	9	Q92508	NA_NA_NA_NA_NA_NA_NA_NA_NA_NA_NA	0.0061
969	531.8	2	-0.00129738	IRFGEALGSL	FALSE	10	Q9UG56	NA_NA_NA_NA_NA_NA_NA_NA_NA_NA_NA_NA	0.0061
970	503.806	2	-0.000782376	TRVFSLVGK	FALSE	9	P13073	NA_NA_NA_NA_NA_NA_NA_NA_NA_NA_NA	0.0061
971	385.226	3	-0.000169595	FRIPWKHGL	FALSE	9	Q14653	NA_NA_NA_NA_NA_NA_NA_NA_NA_NA_NA	0.0061
972	627.845	2	-0.00354788	GRYILEPFFI	FALSE	10	Q9UPY5	NA_NA_NA_NA_NA_NA_NA_NA_NA_NA_NA_NA	0.0061
973	510.279	2	-0.000797881	ARYPDTIAL	FALSE	9	O60336	NA_NA_NA_NA_NA_NA_NA_NA_NA_NA_NA	0.0061
974	553.81	2	-0.00410438	VRNDIYITL	FALSE	9	Q92608	NA_NA_NA_NA_NA_NA_NA_NA_NA_NA_NA	0.0065
975	502.762	2	-0.00175738	GRNEVVSLM	FALSE	9	P42773	NA_NA_NA_NA_NA_NA_NA_NA_NA_NA_NA	0.0065
976	551.784	2	-0.00187888	SRHGLEQYL	FALSE	9	P49069	NA_NA_NA_NA_NA_NA_NA_NA_NA_NA_NA	0.0065
977	363.877	3	-0.0010176	QRAAVIERF	FALSE	9	Q9UMR2	NA_NA_NA_NA_NA_NA_NA_NA_NA_NA_NA	0.0065
978	422.204	3	0.000341402	SRFQSDKYSF	FALSE	10	Q9NZJ4	NA_NA_NA_NA_NA_NA_NA_NA_NA_NA_NA_NA	0.0065
979	513.84	2	-0.00309938	ARTLLAILR	FALSE	9	P33993	NA_NA_NA_NA_NA_NA_NA_NA_NA_NA_NA	0.0065
980	437.263	3	-0.000171935	TRVAPAHGLFLK	FALSE	12	Q8N0Z8	NA_NA_NA_NA_NA_NA_NA_NA_NA_NA_NA_NA_NA_NA	0.0065
981	685.368	2	0.000664119	IRYFPTQALNF	FALSE	11	P05141;P12235;P12236	NA_NA_NA_NA_NA_NA_NA_NA_NA_NA_NA_NA_NA	0.0065
982	528.267	2	-0.000722378	GRVFASGQAY	FALSE	10	Q9H611	NA_NA_NA_NA_NA_NA_NA_NA_NA_NA_NA_NA	0.0065
983	511.757	2	-0.000189875	GRWPGSSLY	FALSE	9	Q14739	NA_NA_NA_NA_NA_NA_NA_NA_NA_NA_NA	0.0065
984	388.565	3	-0.000217595	MRLPFMKKL	FALSE	9	Q13867	NA_NA_NA_NA_NA_NA_NA_NA_NA_NA_NA	0.0065
985	413.255	3	-0.000287928	RRIPAEGRVAL	FALSE	11	Q9UBQ7	NA_NA_NA_NA_NA_NA_NA_NA_NA_NA_NA_NA_NA	0.0065
986	501.295	2	0.00340362	GRNTIQITV	FALSE	9	Q9ULJ6	NA_NA_NA_NA_NA_NA_NA_NA_NA_NA_NA	0.0065
987	511.804	2	-0.000240384	QRVPLSVQL	FALSE	9	Q9BYM8	pyrGlu_NA_NA_NA_NA_NA_NA_NA_NA_NA_NA	0.0065
988	480.75	2	-0.00124988	ARNPSTVCL	FALSE	9	Q9H7E9	NA_NA_NA_NA_NA_NA_NA_NA_NA_NA_NA	0.0065
989	414.269	3	0.00130007	SLSLLLQVVIGV	FALSE	12	Q9NZG7	NA_NA_NA_NA_NA_NA_NA_NA_NA_NA_NA_NA_NA_NA	0.0065
990	532.322	2	-0.000830877	ARHNLIINI	FALSE	9	O43556	NA_NA_NA_NA_NA_NA_NA_NA_NA_NA_NA	0.0065
991	637.81	2	-0.00196838	RQMQLEDGGQL	FALSE	11	Q9NSI2	NA_NA_NA_NA_NA_NA_NA_NA_NA_NA_NA_NA_NA	0.0065
992	511.27	2	-0.00131488	TSRTPLLSM	FALSE	9	Q9NR48	NA_NA_NA_NA_NA_NA_NA_NA_NA_MetOX_NA	0.0065
993	593.361	2	-0.000199375	ARKQIVINLM	FALSE	10	Q6PIW4	NA_NA_NA_NA_NA_NA_NA_NA_NA_NA_NA_NA	0.0065
994	458.244	2	0.00623612	LEDSPLEL	FALSE	8	Q8TEM1	NA_NA_NA_NA_NA_NA_NA_NA_NA_NA	0.0065
995	393.877	3	0.000546402	GRLSGIEERY	FALSE	10	Q01082	NA_NA_NA_NA_NA_NA_NA_NA_NA_NA_NA_NA	0.0065
996	509.788	2	-0.00147538	GRGLGILTTM	FALSE	10	Q92504	NA_NA_NA_NA_NA_NA_NA_NA_NA_NA_NA_NA	0.0065
997	549.774	2	-0.00241138	ARLGPPEPMM	FALSE	10	Q15027	NA_NA_NA_NA_NA_NA_NA_NA_NA_NA_NA_NA	0.0065
998	606.866	2	0.000836621	KRHDLVKLGF	FALSE	10	O60306	NA_NA_NA_NA_NA_NA_NA_NA_NA_NA_NA_NA	0.0064
1000	561.803	2	1.71164e-05	GRMGIEILSF	FALSE	10	Q14254	NA_NA_NA_NA_NA_NA_NA_NA_NA_NA_NA_NA	0.0064
1001	644.309	2	-0.000391883	QRMQEENITR	FALSE	10	P19388	pyrGlu_NA_NA_NA_NA_NA_NA_NA_NA_NA_NA_NA	0.0064
1002	389.215	3	3.53987e-05	ARVWSLMRF	FALSE	9	Q5XKP0	NA_NA_NA_NA_NA_NA_NA_NA_NA_NA_NA	0.0066
1003	460.263	2	-0.00124688	SRASLVTSV	FALSE	9	O43299	NA_NA_NA_NA_NA_NA_NA_NA_NA_NA_NA	0.0066
1004	727.916	2	0.000684125	GRIFLDHIGGTRL	FALSE	13	P62699	NA_NA_NA_NA_NA_NA_NA_NA_NA_NA_NA_NA_NA_NA_NA	0.0066
1005	527.785	2	-0.00137838	QRNELNAKV	FALSE	9	P62195	pyrGlu_NA_NA_NA_NA_NA_NA_NA_NA_NA_NA	0.0066
1006	623.298	2	-0.00320438	SRFYGDLMEK	FALSE	10	Q9BUQ8	NA_NA_NA_NA_NA_NA_NA_NA_NA_NA_NA_NA	0.0066
1007	564.338	2	0.000587618	VSPVVVASSLGL	FALSE	12	P50454	NA_NA_NA_NA_NA_NA_NA_NA_NA_NA_NA_NA_NA_NA	0.0066
1008	406.588	3	0.000333067	RRVYEILRL	FALSE	9	O14929	NA_NA_NA_NA_NA_NA_NA_NA_NA_NA_NA	0.0066
1010	435.759	2	-0.00307538	VNRQAVAL	FALSE	8	Q02817	NA_NA_NA_NA_NA_NA_NA_NA_NA_NA	0.0066
1011	502.781	2	-0.000650384	ERKLSQMI	FALSE	8	O00231	NA_NA_NA_NA_NA_NA_NA_NA_NA_NA	0.0066
1013	631.856	2	-0.00374288	KRFEELTNLI	FALSE	10	B5ME19	NA_NA_NA_NA_NA_NA_NA_NA_NA_NA_NA_NA	0.0066
1014	436.28	3	0.00148974	RRTEVPPLLLI	FALSE	11	Q9NRW7	NA_NA_NA_NA_NA_NA_NA_NA_NA_NA_NA_NA_NA	0.0066
1015	508.285	2	-0.00355788	ARFGPGGQLI	FALSE	10	O15027	NA_NA_NA_NA_NA_NA_NA_NA_NA_NA_NA_NA	0.0066
1016	371.862	3	0.000555734	VRFSGADKSF	FALSE	10	Q5VZL5	NA_NA_NA_NA_NA_NA_NA_NA_NA_NA_NA_NA	0.0066
1017	605.277	2	-0.00267438	FRNFFSNMF	FALSE	9	Q99590	NA_NA_NA_NA_NA_NA_NA_NA_NA_NA_NA	0.0066
1018	486.273	2	-0.00185038	ARWAAGALGV	FALSE	10	Q8WTV0	NA_NA_NA_NA_NA_NA_NA_NA_NA_NA_NA_NA	0.0066
1019	474.267	2	-0.00213338	ARAAELFGL	FALSE	9	Q86Y79	NA_NA_NA_NA_NA_NA_NA_NA_NA_NA_NA	0.0066
1020	452.256	2	-0.000725884	GRFGPLASV	FALSE	9	O15042	NA_NA_NA_NA_NA_NA_NA_NA_NA_NA_NA	0.0066
1021	447.906	3	-0.000976593	SRFPHLLAHTY	FALSE	11	O75460	NA_NA_NA_NA_NA_NA_NA_NA_NA_NA_NA_NA_NA	0.0067
1022	408.877	3	-0.000906261	ARVFFVHEGY	FALSE	10	P08237	NA_NA_NA_NA_NA_NA_NA_NA_NA_NA_NA_NA	0.0067
1023	566.811	2	-0.00215138	VRLPYPLQM	FALSE	9	Q9NPA0	NA_NA_NA_NA_NA_NA_NA_NA_NA_MetOX_NA	0.0067
1024	515.956	3	-0.000407933	ARFQEKKGPPIQF	FALSE	13	Q96IZ5	NA_NA_NA_NA_NA_NA_NA_NA_NA_NA_NA_NA_NA_NA_NA	0.0067
1025	590.303	2	-0.00160088	KRYNEDLEL	FALSE	9	P25787	NA_NA_NA_NA_NA_NA_NA_NA_NA_NA_NA	0.0067
1026	369.562	3	0.000382406	IRSSYIRVL	FALSE	9	P33992	NA_NA_NA_NA_NA_NA_NA_NA_NA_NA_NA	0.0067
1027	670.413	2	0.00211012	MRVPAQLLGLLL	FALSE	12	P04431	NA_MetOX_NA_NA_NA_NA_NA_NA_NA_NA_NA_NA_NA_NA	0.0067
1028	508.288	2	-0.00234288	ARMLLQNAV	FALSE	9	Q9BVC3	NA_NA_NA_NA_NA_NA_NA_NA_NA_NA_NA	0.0067
1029	448.743	2	0.00252662	TSVTDVKF	FALSE	8	Q96EE3	NA_NA_NA_NA_NA_NA_NA_NA_NA_NA	0.0067
1030	438.873	3	-0.00106726	GRWFPEGPTHM	FALSE	11	Q14997	NA_NA_NA_NA_NA_NA_NA_NA_NA_NA_NA_NA_NA	0.0067
1031	522.795	2	0.00149712	KENRGINTL	FALSE	9	P52732	NA_NA_NA_NA_NA_NA_NA_NA_NA_NA_NA	0.0067
1032	407.225	3	-5.92518e-06	ARIKLGDYHF	FALSE	10	Q9UBV2	NA_NA_NA_NA_NA_NA_NA_NA_NA_NA_NA_NA	0.0069
1033	514.831	2	-0.00213138	SRIGLLTRI	FALSE	9	Q14566	NA_NA_NA_NA_NA_NA_NA_NA_NA_NA_NA	0.0069
1034	442.568	3	0.000691401	GRYSQEPIKTF	FALSE	11	Q8TED0	NA_NA_NA_NA_NA_NA_NA_NA_NA_NA_NA_NA_NA	0.0069
1035	449.554	3	0.00034974	HRVSEDVRSDF	FALSE	11	Q8IVL5	NA_NA_NA_NA_NA_NA_NA_NA_NA_NA_NA_NA_NA	0.0069
1036	663.811	2	-0.000836881	GRYDGLVGMFDP	FALSE	12	P12081	NA_NA_NA_NA_NA_NA_NA_NA_NA_NA_NA_NA_NA_NA	0.0069
1037	487.812	2	0.000431624	KRLGLLAGF	FALSE	9	P55061	NA_NA_NA_NA_NA_NA_NA_NA_NA_NA_NA	0.0069
1038	528.35	2	-0.00145688	NRSIVLLLK	FALSE	9	Q9Y6J0	NA_NA_NA_NA_NA_NA_NA_NA_NA_NA_NA	0.0069
1039	565.762	2	0.00018812	SRAGITMESY	FALSE	10	P51946	NA_NA_NA_NA_NA_NA_NA_MetOX_NA_NA_NA_NA	0.0069
1040	556.28	2	-0.00052988	QRQDIAFAY	FALSE	9	P07355	NA_NA_NA_NA_NA_NA_NA_NA_NA_NA_NA	0.0069
1041	646.372	2	-0.00282988	ARLLLPVAEYF	FALSE	11	O00541	NA_NA_NA_NA_NA_NA_NA_NA_NA_NA_NA_NA_NA	0.0069
1042	439.256	3	-0.000405926	YRNKLKYLAF	FALSE	10	P40429	NA_NA_NA_NA_NA_NA_NA_NA_NA_NA_NA_NA	0.0069
1044	508.789	2	0.00157612	EEFVLATLL	FALSE	9	Q96FA7	pyrGlu_NA_NA_NA_NA_NA_NA_NA_NA_NA_NA	0.0069
1045	486.732	2	0.00092812	SSRFSGGFGA	FALSE	10	O00571	NA_NA_NA_NA_NA_NA_NA_NA_NA_NA_NA_NA	0.0069
1046	463.93	3	-0.000392935	RQFDHPHIVKL	FALSE	11	Q05397	NA_NA_NA_NA_NA_NA_NA_NA_NA_NA_NA_NA_NA	0.0069
1047	578.819	2	-0.00362988	QRIYLVTTY	FALSE	9	Q96LW4	NA_NA_NA_NA_NA_NA_NA_NA_NA_NA_NA	0.0069
1048	810.395	2	-0.00318088	MDRMTEDALRLNL	FALSE	13	Q8WXI9	Ac_NA_NA_NA_NA_NA_NA_NA_NA_NA_NA_NA_NA_NA_NA	0.0069
1049	494.267	3	0.000212408	WRKKQSDVMRF	FALSE	11	P61313	NA_NA_NA_NA_NA_NA_NA_NA_NA_NA_NA_NA_NA	0.0069
1051	519.766	2	0.00108862	GRTLSDYNI	FALSE	9	P0CG48	NA_NA_NA_NA_NA_NA_NA_NA_NA_NA_NA	0.0069
1052	514.251	2	-0.000671376	SRNAQTFGF	FALSE	9	Q9NSV4	NA_NA_NA_NA_NA_NA_NA_NA_NA_NA_NA	0.0069
1053	580.297	2	-0.00139688	IRDQMQQQL	FALSE	9	P20700	NA_NA_NA_NA_NA_NA_NA_NA_NA_NA_NA	0.0069
1054	550.279	2	-0.00172938	SRYQGVNLY	FALSE	9	Q13310	NA_NA_NA_NA_NA_NA_NA_NA_NA_NA_NA	0.0069
1055	578.291	2	-0.00303688	SRYDGQIAVF	FALSE	10	P41226	NA_NA_NA_NA_NA_NA_NA_NA_NA_NA_NA_NA	0.0069
1056	812.923	2	-0.00317788	KRFQVEQIGDNKY	FALSE	13	Q03001	NA_NA_NA_NA_NA_NA_NA_NA_NA_NA_NA_NA_NA_NA_NA	0.0069
1057	484.271	2	0.00123562	HRDSGILGL	FALSE	9	Q8NI36	NA_NA_NA_NA_NA_NA_NA_NA_NA_NA_NA	0.0069
1058	492.877	3	-0.00030526	RRYSDESGNMDF	FALSE	12	P04632	NA_NA_NA_NA_NA_NA_NA_NA_NA_NA_NA_NA_NA_NA	0.0069
1059	481.929	3	0.000471067	ARLDWELEQRK	FALSE	11	Q13769	NA_NA_NA_NA_NA_NA_NA_NA_NA_NA_NA_NA_NA	0.0069
1060	714.371	2	0.00333562	ARVLVDGEEHVGF	FALSE	13	Q9NPA0	NA_NA_NA_NA_NA_NA_NA_NA_NA_NA_NA_NA_NA_NA_NA	0.0068
1061	384.911	3	-0.0024916	HRLIIKPYL	FALSE	9	Q9NVH1	NA_NA_NA_NA_NA_NA_NA_NA_NA_NA_NA	0.0068
1062	508.606	3	0.000325071	YRYYNKYINVK	FALSE	11	P56134	NA_NA_NA_NA_NA_NA_NA_NA_NA_NA_NA_NA_NA	0.0068
1063	622.852	2	-0.00226088	ARVLLVPDNTF	FALSE	11	Q9H6Y7	NA_NA_NA_NA_NA_NA_NA_NA_NA_NA_NA_NA_NA	0.0068
1064	513.947	3	-0.000700598	ARYKPTGEYVTVR	FALSE	13	Q7RTN6	NA_NA_NA_NA_NA_NA_NA_NA_NA_NA_NA_NA_NA_NA_NA	0.0068
1065	477.304	2	-0.00740088	LILPNKQK	FALSE	8	Q6ZWH5	NA_NA_NA_NA_NA_NA_NA_NA_NA_NA	0.0068
1066	443.215	2	-0.000257877	SRFSGGFGA	FALSE	9	O00571	NA_NA_NA_NA_NA_NA_NA_NA_NA_NA_NA	0.0068
1069	351.897	3	-0.000829599	KRTNIIPVI	FALSE	9	P22087	NA_NA_NA_NA_NA_NA_NA_NA_NA_NA_NA	0.0068
1070	543.318	2	-0.00155438	ERVKLQEAL	FALSE	9	P11532	NA_NA_NA_NA_NA_NA_NA_NA_NA_NA_NA	0.0068
1071	604.842	2	-0.000996885	SRFFLQGIQL	FALSE	10	P11279	NA_NA_NA_NA_NA_NA_NA_NA_NA_NA_NA_NA	0.0068
1072	632.786	2	-0.00133038	GRFDEAYIYM	FALSE	10	Q6DKK2	NA_NA_NA_NA_NA_NA_NA_NA_NA_NA_NA_NA	0.0068
1073	410.893	3	0.0012854	ARWNSKENLL	FALSE	10	P00519	NA_NA_NA_NA_NA_NA_NA_NA_NA_NA_NA_NA	0.0068
1074	593.788	2	-0.000163881	HRTEMDWVL	FALSE	9	P52597	NA_NA_NA_NA_NA_NA_NA_NA_NA_NA_NA	0.0068
1075	505.341	2	-0.00200088	TRALLLPLL	FALSE	9	P14543	NA_NA_NA_NA_NA_NA_NA_NA_NA_NA_NA	0.0068
1077	382.885	3	0.000527734	GRQEIFLQR	FALSE	9	Q8TEZ7	NA_NA_NA_NA_NA_NA_NA_NA_NA_NA_NA	0.0068
1078	536.79	2	-0.00126038	QRTNLDVNL	FALSE	9	O95071	NA_NA_NA_NA_NA_NA_NA_NA_NA_NA_NA	0.0068
1080	615.773	2	0.00289712	GRFDCSDRQF	FALSE	10	Q6ZNJ1	NA_NA_NA_NA_NA_NA_NA_NA_NA_NA_NA_NA	0.0068
1081	653.813	2	-0.00141088	MRISPDQGQQF	FALSE	11	Q00610	NA_NA_NA_NA_NA_NA_NA_NA_NA_NA_NA_NA_NA	0.0068
1082	590.829	2	0.00085362	YRNQLLNIF	FALSE	9	O15228	NA_NA_NA_NA_NA_NA_NA_NA_NA_NA_NA	0.0068
1083	499.82	2	-0.00173288	GRLKDILAI	FALSE	9	Q6ZSZ5	NA_NA_NA_NA_NA_NA_NA_NA_NA_NA_NA	0.0068
1084	563.799	2	0.000745619	GRFTGLESIF	FALSE	10	Q8N4Q0	NA_NA_NA_NA_NA_NA_NA_NA_NA_NA_NA_NA	0.0068
1085	362.533	3	-0.000350933	QRFGLGSLAH	FALSE	10	Q86UW9	NA_NA_NA_NA_NA_NA_NA_NA_NA_NA_NA_NA	0.0068
1086	519.806	2	-0.00252538	GRIFIGTFK	FALSE	9	P14678	NA_NA_NA_NA_NA_NA_NA_NA_NA_NA_NA	0.0068
1087	505.268	2	-0.00162938	TRLSEGFSI	FALSE	9	P20618	NA_NA_NA_NA_NA_NA_NA_NA_NA_NA_NA	0.0068
1088	419.545	3	-0.000650265	ARSLFNRMDF	FALSE	10	Q9P0P0	NA_NA_NA_NA_NA_NA_NA_NA_NA_NA_NA_NA	0.007
1089	428.217	3	0.000289402	ARFDAYFHQK	FALSE	10	P35790	NA_NA_NA_NA_NA_NA_NA_NA_NA_NA_NA_NA	0.007
1091	471.809	2	0.000374624	ARLGVISKV	FALSE	9	Q9ULT8	NA_NA_NA_NA_NA_NA_NA_NA_NA_NA_NA	0.007
1092	526.779	2	-0.00146538	ARYGPQFTL	FALSE	9	Q9Y5F6	NA_NA_NA_NA_NA_NA_NA_NA_NA_NA_NA	0.007
1093	533.735	2	-0.00198288	ARAGIDDMSM	FALSE	10	Q9ULT0	NA_NA_NA_NA_NA_NA_NA_NA_NA_NA_NA_NA	0.007
1094	365.882	3	-8.02654e-05	ARFYAVQKL	FALSE	9	Q16891	NA_NA_NA_NA_NA_NA_NA_NA_NA_NA_NA	0.007
1095	594.363	2	-0.00373888	KRNIGVVVVGF	FALSE	11	O15270	NA_NA_NA_NA_NA_NA_NA_NA_NA_NA_NA_NA_NA	0.007
1096	521.304	2	-0.00274688	GRIGPLQSTL	FALSE	10	Q15386	NA_NA_NA_NA_NA_NA_NA_NA_NA_NA_NA_NA	0.007
1097	560.321	2	0.00315412	RAFLQELRS	FALSE	9	I3L2P9	NA_NA_NA_NA_NA_NA_NA_NA_NA_NA_NA	0.007
1098	632.273	2	-0.00402988	SRFGGPEMYGY	FALSE	11	Q8TDB6	NA_NA_NA_NA_NA_NA_NA_NA_NA_NA_NA_NA_NA	0.007
1099	557.273	2	-0.000758375	SRFLMPEAY	FALSE	9	O43166	NA_NA_NA_NA_NA_NA_NA_NA_NA_NA_NA	0.007
1100	577.302	2	-0.00190438	ARNIYQEFL	FALSE	9	O43566	NA_NA_NA_NA_NA_NA_NA_NA_NA_NA_NA	0.007
1102	419.581	3	-0.000112262	FRNFKIIYR	FALSE	9	P53680	NA_NA_NA_NA_NA_NA_NA_NA_NA_NA_NA	0.007
1103	573.272	2	-0.00070388	FRFENVNGY	FALSE	9	P08243	NA_NA_NA_NA_NA_NA_NA_NA_NA_NA_NA	0.007
1104	440.775	2	0.00586212	FGKLFGLV	FALSE	8	Q8NBI5	NA_NA_NA_NA_NA_NA_NA_NA_NA_NA	0.007
1105	468.257	2	-0.000999375	LDTDFIVL	FALSE	8	Q9NPC4	NA_NA_NA_NA_NA_NA_NA_NA_NA_NA	0.007
1106	763.879	2	-0.000396381	KRFDDPGLMLMGF	FALSE	13	P12956	NA_NA_NA_NA_NA_NA_NA_NA_NA_NA_NA_NA_NA_NA_NA	0.0069
1107	559.305	2	-0.00108988	QRMLDQTLL	FALSE	9	P06753-2	NA_NA_NA_NA_NA_NA_NA_NA_NA_NA_NA	0.0069
1108	761.381	2	-0.000729377	KRFWYIEGIMY	FALSE	11	Q92604	NA_NA_NA_NA_NA_NA_NA_NA_NA_NA_MetOX_NA_NA	0.0069
1109	379.207	3	0.000424738	FRVPFIYGH	FALSE	9	Q9NZ01	NA_NA_NA_NA_NA_NA_NA_NA_NA_NA_NA	0.0069
1110	397.224	3	0.00159207	RRIQFPIEM	FALSE	9	Q7L576	NA_NA_NA_NA_NA_NA_NA_NA_NA_NA_NA	0.0069
1111	555.282	2	-0.000318379	YRHLVGVCY	FALSE	9	P08574	NA_NA_NA_NA_NA_NA_NA_NA_NA_NA_NA	0.0069
1112	474.268	2	-0.00133338	GRIEGLFGV	FALSE	9	O75113	NA_NA_NA_NA_NA_NA_NA_NA_NA_NA_NA	0.0069
1113	705.376	2	-0.00487438	RRFEEALQTIF	FALSE	11	O94832	NA_NA_NA_NA_NA_NA_NA_NA_NA_NA_NA_NA_NA	0.0069
1114	395.901	3	-0.000474594	HRLFPKLQF	FALSE	9	Q9BVW5	NA_NA_NA_NA_NA_NA_NA_NA_NA_NA_NA	0.0069
1115	557.34	2	-0.00122088	GRVITALVER	FALSE	10	P52732	NA_NA_NA_NA_NA_NA_NA_NA_NA_NA_NA_NA	0.0068
1116	521.259	3	-0.00168993	YRNEFTAWYRR	FALSE	11	A0A087WZV9	NA_NA_NA_NA_NA_NA_NA_NA_NA_NA_NA_NA_NA	0.0068
1117	590.959	3	0.00062307	RRWYPEEYEFAPK	FALSE	13	Q9Y3B8	NA_NA_NA_NA_NA_NA_NA_NA_NA_NA_NA_NA_NA_NA_NA	0.0068
1118	665.429	2	0.00133812	RRFDLLKRIL	FALSE	10	O15519	NA_NA_NA_NA_NA_NA_NA_NA_NA_NA_NA_NA	0.0068
1120	490.758	2	-0.00110988	HRNPMGIGV	FALSE	9	Q13029	NA_NA_NA_NA_NA_NA_NA_NA_NA_NA_NA	0.0068
1123	685.863	2	0.00217112	SRLNITYPMLF	FALSE	11	Q92890	NA_NA_NA_NA_NA_NA_NA_NA_NA_MetOX_NA_NA_NA	0.0068
1124	409.891	3	5.37361e-05	RMFLSFPTTK	FALSE	10	P69905	NA_NA_NA_NA_NA_NA_NA_NA_NA_NA_NA_NA	0.0068
1125	508.28	2	-0.000328879	GRLDNITQV	FALSE	9	P58005	NA_NA_NA_NA_NA_NA_NA_NA_NA_NA_NA	0.0068
1126	405.53	3	0.00019907	FRYGGEAQMR	FALSE	10	O75694	NA_NA_NA_NA_NA_NA_NA_NA_NA_NA_NA_NA	0.0068
1128	586.864	2	-0.00902288	LRFLLARGAR	FALSE	10	E5RJM6	NA_NA_NA_NA_NA_NA_NA_NA_NA_NA_NA_NA	0.0068
1129	554.81	2	-0.00186538	IRYFPTQAL	FALSE	9	P05141;P12235;P12236	NA_NA_NA_NA_NA_NA_NA_NA_NA_NA_NA	0.0068
1130	601.287	2	0.00138862	YRDWFSSQL	FALSE	9	O95864	NA_NA_NA_NA_NA_NA_NA_NA_NA_NA_NA	0.0068
1131	392.885	3	0.000550738	QRYPDGIISK	FALSE	10	Q86U44	NA_NA_NA_NA_NA_NA_NA_NA_NA_NA_NA_NA	0.0068
1132	451.259	3	0.000891074	RRPTLTTFFGR	FALSE	11	P16150	NA_NA_NA_NA_NA_NA_NA_NA_NA_NA_NA_NA_NA	0.0068
1133	365.905	3	-9.59308e-05	SRIAIGPLRL	FALSE	10	Q96Q15	NA_NA_NA_NA_NA_NA_NA_NA_NA_NA_NA_NA	0.0068
1134	527.838	2	-0.00265688	ARKQIVINL	FALSE	9	Q6PIW4	NA_NA_NA_NA_NA_NA_NA_NA_NA_NA_NA	0.0068
1135	613.863	2	-0.00186088	KRIEQIAQQL	FALSE	10	P18074	NA_NA_NA_NA_NA_NA_NA_NA_NA_NA_NA_NA	0.0068
1136	459.264	2	-5.08777e-05	ARIPGLSGF	FALSE	9	M0QYQ0	NA_NA_NA_NA_NA_NA_NA_NA_NA_NA_NA	0.0068
1137	452.542	3	-0.00146426	HRMFWREMY	FALSE	9	O60502	NA_NA_NA_NA_NA_NA_NA_NA_NA_NA_NA	0.0068
1138	498.923	3	0.00132574	SRFDASFFGVHPK	FALSE	13	P49327	NA_NA_NA_NA_NA_NA_NA_NA_NA_NA_NA_NA_NA_NA_NA	0.0068
1139	451.891	3	-0.000203932	HRFYPDKIDY	FALSE	10	Q8N3D4	NA_NA_NA_NA_NA_NA_NA_NA_NA_NA_NA_NA	0.0068
1140	506.783	2	-0.000407877	VRWVGGPEI	FALSE	9	P48643	NA_NA_NA_NA_NA_NA_NA_NA_NA_NA_NA	0.0068
1141	358.884	3	0.000207736	ARLKDIIVM	FALSE	9	Q709C8	NA_NA_NA_NA_NA_NA_NA_NA_NA_MetOX_NA	0.0068
1142	477.306	2	0.000515616	LLLPGELAK	FALSE	9	Q96A08	NA_NA_NA_NA_NA_NA_NA_NA_NA_NA_NA	0.0068
1143	573.288	2	-0.00428288	GRFQPLPEAM	FALSE	10	O95613	NA_NA_NA_NA_NA_NA_NA_NA_NA_NA_NA_NA	0.0068
1144	698.369	2	-0.00192938	IRFPLMTIEEF	FALSE	11	Q9BX70	NA_NA_NA_NA_NA_NA_NA_NA_NA_NA_NA_NA_NA	0.0068
1145	588.833	2	0.00251062	LRFGPNGGLVF	FALSE	11	Q9UHW5	NA_NA_NA_NA_NA_NA_NA_NA_NA_NA_NA_NA_NA	0.0068
1146	600.777	2	-0.00395888	ARFDSDVEVY	FALSE	10	P01920	NA_NA_NA_NA_NA_NA_NA_NA_NA_NA_NA_NA	0.0068
1147	509.288	2	-0.00236538	SRFDIPLGL	FALSE	9	O94913	NA_NA_NA_NA_NA_NA_NA_NA_NA_NA_NA	0.0068
1148	544.319	2	0.00178562	GRFLTGPLNL	FALSE	10	P86790	NA_NA_NA_NA_NA_NA_NA_NA_NA_NA_NA_NA	0.0068
1149	550.315	2	-0.00181488	GRHYILDLL	FALSE	9	O75153	NA_NA_NA_NA_NA_NA_NA_NA_NA_NA_NA	0.0068
1150	483.574	3	-0.000285934	WRYYEKNRSF	FALSE	10	O75694	NA_NA_NA_NA_NA_NA_NA_NA_NA_NA_NA_NA	0.0068
1151	450.288	2	0.00579112	NLKELLAV	FALSE	8	Q13613	NA_NA_NA_NA_NA_NA_NA_NA_NA_NA	0.0068
1152	640.85	2	-0.00406138	KRIEEFLAQF	FALSE	10	Q9UBD5	NA_NA_NA_NA_NA_NA_NA_NA_NA_NA_NA_NA	0.0068
1153	407.539	3	0.000158734	VRFDSDAASPR	FALSE	11	P03989;P30504	NA_NA_NA_NA_NA_NA_NA_NA_NA_NA_NA_NA_NA	0.0068
1154	662.876	2	-0.00230288	QRAGLQFPVGRI	FALSE	12	P0C0S5	pyrGlu_NA_NA_NA_NA_NA_NA_NA_NA_NA_NA_NA_NA_NA	0.0068
1155	411.916	3	0.000339399	KRIEAIVKNY	FALSE	10	P19404	NA_NA_NA_NA_NA_NA_NA_NA_NA_NA_NA_NA	0.0068
1156	456.592	3	0.000811071	KRWQAIYKQF	FALSE	10	P04632	NA_NA_NA_NA_NA_NA_NA_NA_NA_NA_NA_NA	0.0068
1157	424.907	3	-0.000465262	KRYQDIIHSI	FALSE	10	Q9UIG0	NA_NA_NA_NA_NA_NA_NA_NA_NA_NA_NA_NA	0.0068
1158	480.308	2	0.00178112	IAAIRGFLV	FALSE	9	Q8NFV4	NA_NA_NA_NA_NA_NA_NA_NA_NA_NA_NA	0.0068
1159	586.29	2	-0.00079338	TRYLENQTF	FALSE	9	O00139	NA_NA_NA_NA_NA_NA_NA_NA_NA_NA_NA	0.0068
1160	350.951	4	6.12924e-05	YRIGQSKVFFR	FALSE	11	P35579	NA_NA_NA_NA_NA_NA_NA_NA_NA_NA_NA_NA_NA	0.0068
1161	508.286	2	-0.00760488	VGTGNGVVISI	FALSE	11	Q9UPT6	NA_NA_NA_NA_NA_NA_NA_NA_NA_NA_NA_NA_NA	0.0068
1162	371.905	3	2.70744e-05	GRTELAIKLL	FALSE	10	Q9H269	NA_NA_NA_NA_NA_NA_NA_NA_NA_NA_NA_NA	0.0068
1163	758.871	2	0.00785362	YRFEGEGDIQRF	FALSE	12	Q86TL0	NA_NA_NA_NA_NA_NA_NA_NA_NA_NA_NA_NA_NA_NA	0.0068
1164	428.231	3	-0.000937262	VRFDPGTSIKY	FALSE	11	P20023	NA_NA_NA_NA_NA_NA_NA_NA_NA_NA_NA_NA_NA	0.0068
1165	403.231	3	-0.000848931	SRQGSIKGLVY	FALSE	11	Q96P11	NA_NA_NA_NA_NA_NA_NA_NA_NA_NA_NA_NA_NA	0.0068
1166	577.384	2	-0.00323988	GRLKLVLLEL	FALSE	10	P48556	NA_NA_NA_NA_NA_NA_NA_NA_NA_NA_NA_NA	0.0068
1167	466.272	2	-0.000275875	GRVGVFPSL	FALSE	9	Q86WN1	NA_NA_NA_NA_NA_NA_NA_NA_NA_NA_NA	0.0068
1168	592.306	2	-0.00328588	SRFEALNLSF	FALSE	10	P14859	NA_NA_NA_NA_NA_NA_NA_NA_NA_NA_NA_NA	0.0068
1169	591.335	2	-0.00354688	YRENVFKLL	FALSE	9	P39687	NA_NA_NA_NA_NA_NA_NA_NA_NA_NA_NA	0.0068
1170	503.752	2	-0.000104377	GRIDNVDAF	FALSE	9	Q969L4	NA_NA_NA_NA_NA_NA_NA_NA_NA_NA_NA	0.0068
1171	542.792	2	-0.00187238	SRFQGTLYL	FALSE	9	O77932	NA_NA_NA_NA_NA_NA_NA_NA_NA_NA_NA	0.0068
1172	632.325	2	-0.00361088	HRAELSQLFY	FALSE	10	Q15542	NA_NA_NA_NA_NA_NA_NA_NA_NA_NA_NA_NA	0.0068
1173	663.833	2	-0.00254638	GRYGEVMPVYR	FALSE	11	Q6PL24	NA_NA_NA_NA_NA_NA_NA_NA_NA_NA_NA_NA_NA	0.0068
1175	589.767	2	0.00195712	ERNPENWAY	FALSE	9	Q9BXJ9	NA_NA_NA_NA_NA_NA_NA_NA_NA_NA_NA	0.0068
1177	525.29	2	-0.00149638	GRTNLIVNY	FALSE	9	Q15717	NA_NA_NA_NA_NA_NA_NA_NA_NA_NA_NA	0.0068
1178	423.583	3	-0.000215598	RRNGTLPWLR	FALSE	10	P31153	NA_NA_NA_NA_NA_NA_NA_NA_NA_NA_NA_NA	0.0068
1179	375.231	3	0.000809073	SRFGKFIRI	FALSE	9	P35579	NA_NA_NA_NA_NA_NA_NA_NA_NA_NA_NA	0.0068
1180	516.264	2	-9.03809e-05	ARLPDSELM	FALSE	9	Q5T4F4	NA_NA_NA_NA_NA_NA_NA_NA_NA_NA_NA	0.0068
1181	494.783	2	0.000291623	AFRQALQL	FALSE	8	Q96HS1	Ac_NA_NA_NA_NA_NA_NA_NA_NA_NA	0.0068
1182	359.201	3	0.0013854	MRWAAATLR	FALSE	9	Q96L08	NA_NA_NA_NA_NA_NA_NA_NA_NA_NA_NA	0.0068
1183	454.935	3	5.60748e-05	LRFDKPIKQAF	FALSE	11	Q9H330	NA_NA_NA_NA_NA_NA_NA_NA_NA_NA_NA_NA_NA	0.0068
1184	696.861	2	-0.00363788	ARLNPQYPMFR	FALSE	11	Q14738	NA_NA_NA_NA_NA_NA_NA_NA_NA_NA_NA_NA_NA	0.0068
1185	742.81	2	7.81208e-05	QRWDTDEEGMAF	FALSE	12	Q96L92	NA_NA_NA_NA_NA_NA_NA_NA_NA_NA_NA_NA_NA_NA	0.0068
1186	410.549	3	-0.000177935	ARFEGDFKLF	FALSE	10	O43529	NA_NA_NA_NA_NA_NA_NA_NA_NA_NA_NA_NA	0.0068
1187	353.882	3	-0.000179925	ARFTGAPLKV	FALSE	10	Q13505	NA_NA_NA_NA_NA_NA_NA_NA_NA_NA_NA_NA	0.0068
1188	424.887	3	-0.00139327	WRVSLDVNHF	FALSE	10	P04792	NA_NA_NA_NA_NA_NA_NA_NA_NA_NA_NA_NA	0.0067
1189	591.29	2	-0.00258238	HRSYIDFLM	FALSE	9	O15228	NA_NA_NA_NA_NA_NA_NA_NA_NA_NA_NA	0.0067
1190	651.293	2	-0.00301888	ERLEMAENYF	FALSE	10	O95905	NA_NA_NA_NA_NA_NA_NA_NA_NA_NA_NA_NA	0.0067
1191	443.62	3	0.000344738	IRVKTNLPIFK	FALSE	11	O60493	NA_NA_NA_NA_NA_NA_NA_NA_NA_NA_NA_NA_NA	0.0067
1192	376.215	3	-0.000176264	HRAPIFMRV	FALSE	9	P50225	NA_NA_NA_NA_NA_NA_NA_NA_NA_NA_NA	0.0067
1193	558.788	2	-0.000185876	SRKTFTETF	FALSE	9	Q5R372	NA_NA_NA_NA_NA_NA_NA_NA_NA_NA_NA	0.0067
1194	628.867	2	0.00573712	KMSLIHSIATR	FALSE	11	Q9ULK4	NA_NA_NA_NA_NA_NA_NA_NA_NA_NA_NA_NA_NA	0.0067
1195	566.303	2	0.00163512	GRLFPGEWGL	FALSE	10	K7EK09	NA_NA_NA_NA_NA_NA_NA_NA_NA_NA_NA_NA	0.0067
1197	617.298	2	-0.000719383	YRFGQVYTEA	FALSE	10	P46977	NA_NA_NA_NA_NA_NA_NA_NA_NA_NA_NA_NA	0.0067
1198	561.291	2	-0.00208238	GRFSLPGATCL	FALSE	11	P57764	NA_NA_NA_NA_NA_NA_NA_NA_NA_NA_NA_NA_NA	0.0067
1199	478.233	3	-0.00131726	SRFSSKSDVWSF	FALSE	12	P42680	NA_NA_NA_NA_NA_NA_NA_NA_NA_NA_NA_NA_NA_NA	0.0067
1200	484.816	2	0.00526612	LIVQNIVGL	FALSE	9	Q14654	NA_NA_NA_NA_NA_NA_NA_NA_NA_NA_NA	0.0067
1201	393.569	3	0.000339074	SRYDGVIKKL	FALSE	10	P11182	NA_NA_NA_NA_NA_NA_NA_NA_NA_NA_NA_NA	0.0067
1202	491.606	3	-8.62604e-05	ARLLFSFYKDGR	FALSE	12	Q7L513	NA_NA_NA_NA_NA_NA_NA_NA_NA_NA_NA_NA_NA_NA	0.0067
1205	435.924	3	0.000796069	ARILDEGKIKY	FALSE	11	Q9Y592	NA_NA_NA_NA_NA_NA_NA_NA_NA_NA_NA_NA_NA	0.0067
1206	446.584	3	0.000618407	RRYIDPSGFVK	FALSE	11	Q86UV5	NA_NA_NA_NA_NA_NA_NA_NA_NA_NA_NA_NA_NA	0.0067
1207	380.205	3	-0.000222263	WQFSSVTKR	FALSE	9	P42224	NA_NA_NA_NA_NA_NA_NA_NA_NA_NA_NA	0.0067
1208	502.261	3	-0.00051993	ARYPFHKQPPTY	FALSE	12	Q9BU23	NA_NA_NA_NA_NA_NA_NA_NA_NA_NA_NA_NA_NA_NA	0.0067
1209	545.818	2	0.00105212	GRLDQLIYI	FALSE	9	P55072	NA_NA_NA_NA_NA_NA_NA_NA_NA_NA_NA	0.0067
1210	568.28	2	-0.000729384	QRYPNPYSK	FALSE	9	Q9Y255	pyrGlu_NA_NA_NA_NA_NA_NA_NA_NA_NA_NA	0.0067
1211	555.293	2	-0.000282384	KRVESIQCF	FALSE	9	Q14527	NA_NA_NA_NA_NA_NA_NA_NA_NA_NA_NA	0.0067
1212	546.302	2	-0.00220738	QRFPNALFV	FALSE	9	O60294	NA_NA_NA_NA_NA_NA_NA_NA_NA_NA_NA	0.0067
1213	466.619	3	0.000133067	NRFPWPKVLKI	FALSE	11	P11171	NA_NA_NA_NA_NA_NA_NA_NA_NA_NA_NA_NA_NA	0.0067
1214	532.296	2	0.00229462	ERADLIAYL	FALSE	9	P99999	NA_NA_NA_NA_NA_NA_NA_NA_NA_NA_NA	0.0067
1215	363.884	3	7.34004e-05	HRMHILLGL	FALSE	9	Q96GQ7	NA_NA_NA_NA_NA_NA_NA_NA_NA_NA_NA	0.0067
1216	526.789	2	-0.00192888	SRSLLQTTF	FALSE	9	Q5VZE5	NA_NA_NA_NA_NA_NA_NA_NA_NA_NA_NA	0.0067
1217	622.81	2	-0.00282788	QRHWQEITF	FALSE	9	Q9Y672	NA_NA_NA_NA_NA_NA_NA_NA_NA_NA_NA	0.0067
1218	592.327	2	-0.000778883	KRLNFITEY	FALSE	9	P53667	NA_NA_NA_NA_NA_NA_NA_NA_NA_NA_NA	0.0067
1219	653.333	2	-0.00356438	SRLDLIAQQMM	FALSE	11	P36543	NA_NA_NA_NA_NA_NA_NA_NA_NA_NA_NA_NA_NA	0.0067
1223	486.792	2	-9.87725e-06	VVDAIPVFL	FALSE	9	Q14669	NA_NA_NA_NA_NA_NA_NA_NA_NA_NA_NA	0.0067
1225	543.319	2	0.00446212	GALSALQLEAI	FALSE	11	Q9Y2G9	NA_NA_NA_NA_NA_NA_NA_NA_NA_NA_NA_NA_NA	0.0067
1226	379.483	4	0.0011628	ERLDLKKIQFPK	FALSE	12	Q92993	NA_NA_NA_NA_NA_NA_NA_NA_NA_NA_NA_NA_NA_NA	0.0067
1228	545.809	2	0.000531623	MRLGSPGLLF	FALSE	10	O75144	NA_NA_NA_NA_NA_NA_NA_NA_NA_NA_NA_NA	0.0067
1229	535.8	2	-0.00192838	QRIVENVNV	FALSE	9	P13639	NA_NA_NA_NA_NA_NA_NA_NA_NA_NA_NA	0.0067
1230	382.905	3	1.54069e-05	VRIGGISGIFK	FALSE	11	Q9UK59	NA_NA_NA_NA_NA_NA_NA_NA_NA_NA_NA_NA_NA	0.0067
1231	424.919	3	-0.000893601	SRFPEALRLAL	FALSE	11	Q13200	NA_NA_NA_NA_NA_NA_NA_NA_NA_NA_NA_NA_NA	0.0066
1232	419.221	3	0.000256403	SRCSVASIKTGF	FALSE	12	P20042	NA_NA_NA_NA_NA_NA_NA_NA_NA_NA_NA_NA_NA_NA	0.0066
1233	466.933	3	0.000838066	RRLLEGEEQRL	FALSE	11	Q14533	NA_NA_NA_NA_NA_NA_NA_NA_NA_NA_NA_NA_NA	0.0066
1234	623.326	2	0.000986125	ARLDHKFDLM	FALSE	10	P68363	NA_NA_NA_NA_NA_NA_NA_NA_NA_NA_NA_NA	0.0066
1235	499.326	2	0.00159162	ALGRELLLL	FALSE	9	Q9UPS6	NA_NA_NA_NA_NA_NA_NA_NA_NA_NA_NA	0.0066
1236	438.258	3	2.50669e-05	LRDEINAILQK	FALSE	11	Q99707	NA_NA_NA_NA_NA_NA_NA_NA_NA_NA_NA_NA_NA	0.0066
1237	364.23	3	0.000120405	YRLAVRTVI	FALSE	9	Q9BYC9	NA_NA_NA_NA_NA_NA_NA_NA_NA_NA_NA	0.0066
1238	396.233	4	0.000315548	KRLSEHLTESILR	FALSE	13	Q96PP9	NA_NA_NA_NA_NA_NA_NA_NA_NA_NA_NA_NA_NA_NA_NA	0.0066
1239	721.44	2	-0.00113188	KRIQKELAEITL	FALSE	12	Q969T4	NA_NA_NA_NA_NA_NA_NA_NA_NA_NA_NA_NA_NA_NA	0.0066
1240	500.291	2	-0.000199877	SRAHLVAVF	FALSE	9	P50995	NA_NA_NA_NA_NA_NA_NA_NA_NA_NA_NA	0.0066
1241	580.795	2	-0.00144688	GRWQEPFQL	FALSE	9	Q9BZE2	NA_NA_NA_NA_NA_NA_NA_NA_NA_NA_NA	0.0066
1242	537.273	2	-0.00211588	ARIPFYGSY	FALSE	9	P61011	NA_NA_NA_NA_NA_NA_NA_NA_NA_NA_NA	0.0066
1243	426.564	3	0.000490074	WRFSGQIERV	FALSE	10	Q13610	NA_NA_NA_NA_NA_NA_NA_NA_NA_NA_NA_NA	0.0066
1244	502.28	2	-0.00294088	GRYEVAVPL	FALSE	9	Q9H0B6	NA_NA_NA_NA_NA_NA_NA_NA_NA_NA_NA	0.0066
1245	543.783	2	0.00117262	HRVMLVNSM	FALSE	9	P18206	NA_NA_NA_NA_NA_NA_NA_NA_NA_NA_NA	0.0066
1246	549.805	2	-0.00161388	HRNLAIFDL	FALSE	9	Q9NXC5	NA_NA_NA_NA_NA_NA_NA_NA_NA_NA_NA	0.0066
1247	602.855	2	-0.00160388	KRFADAASLLL	FALSE	11	Q9BW27	NA_NA_NA_NA_NA_NA_NA_NA_NA_NA_NA_NA_NA	0.0066
1248	596.84	2	0.000204122	SRMSASILLSK	FALSE	11	Q9H3U1	NA_NA_NA_NA_NA_NA_NA_NA_NA_NA_NA_NA_NA	0.0066
1249	457.223	3	0.00119874	YRFEGEGDIQR	FALSE	11	Q86TL0	NA_NA_NA_NA_NA_NA_NA_NA_NA_NA_NA_NA_NA	0.0066
1250	746.351	2	-0.00174588	ARWQDIQNDAQF	FALSE	12	Q12873	NA_NA_NA_NA_NA_NA_NA_NA_NA_NA_NA_NA_NA_NA	0.0066
1251	422.254	3	-0.000976266	GRLPVPKEVNR	FALSE	11	Q16612	NA_NA_NA_NA_NA_NA_NA_NA_NA_NA_NA_NA_NA	0.0066
1252	510.924	3	-0.0012726	RWTEYGLTFTEK	FALSE	12	P21796	NA_NA_NA_NA_NA_NA_NA_NA_NA_NA_NA_NA_NA_NA	0.0066
1253	577.286	2	-0.000411881	GQYGNPLNKY	FALSE	10	O14672	NA_NA_NA_NA_NA_NA_NA_NA_NA_NA_NA_NA	0.0066
1254	574.827	2	0.00179562	QRKDVYVQL	FALSE	9	P42166	NA_NA_NA_NA_NA_NA_NA_NA_NA_NA_NA	0.0066
1255	548.792	2	0.00414462	KDPESFFKV	FALSE	9	Q4AE62	NA_NA_NA_NA_NA_NA_NA_NA_NA_NA_NA	0.0066
1256	353.221	4	-0.000183206	RRLKDIGPEVVK	FALSE	12	P51659	NA_NA_NA_NA_NA_NA_NA_NA_NA_NA_NA_NA_NA_NA	0.0066
1257	470.266	2	-0.00149038	GRDPALPTL	FALSE	9	Q13724	NA_NA_NA_NA_NA_NA_NA_NA_NA_NA_NA	0.0066
1258	549.284	2	-0.00167988	SRVAFFEEL	FALSE	9	P35240	NA_NA_NA_NA_NA_NA_NA_NA_NA_NA_NA	0.0066
1259	376.866	3	0.000322401	IRYPDSHQL	FALSE	9	Q9UN86	NA_NA_NA_NA_NA_NA_NA_NA_NA_NA_NA	0.0066
1260	492.269	2	-0.000533882	GRLYAIAGY	FALSE	9	Q53G59	NA_NA_NA_NA_NA_NA_NA_NA_NA_NA_NA	0.0066
1261	379.245	2	-0.000195381	TALLAGLV	FALSE	8	P14679	NA_NA_NA_NA_NA_NA_NA_NA_NA_NA	0.0066
1262	442.262	3	-0.0013606	ARYQLSAIFKK	FALSE	11	Q9Y4A5	NA_NA_NA_NA_NA_NA_NA_NA_NA_NA_NA_NA_NA	0.0066
1263	351.902	3	0.000325734	ARIILVNVR	FALSE	9	Q6P3X3	NA_NA_NA_NA_NA_NA_NA_NA_NA_NA_NA	0.0066
1264	514.809	2	0.00654512	LCLLHFLVA	FALSE	9	O60909	NA_NA_NA_NA_NA_NA_NA_NA_NA_NA_NA	0.0066
1265	447.596	3	-0.000739925	YRFLPQKIIY	FALSE	10	Q9UL46	NA_NA_NA_NA_NA_NA_NA_NA_NA_NA_NA_NA	0.0066
1266	630.304	2	-0.00284438	GRTYPVQEYF	FALSE	10	Q08211	NA_NA_NA_NA_NA_NA_NA_NA_NA_NA_NA_NA	0.0066
1267	514.298	2	-0.000822382	QRAEVVVQV	FALSE	9	Q92619	NA_NA_NA_NA_NA_NA_NA_NA_NA_NA_NA	0.0066
1268	687.857	2	-0.00531788	KRYLNSGGFIGY	FALSE	12	O00469	NA_NA_NA_NA_NA_NA_NA_NA_NA_NA_NA_NA_NA_NA	0.0066
1269	491.583	3	0.00167107	HRWNFDDLLEK	FALSE	11	Q9Y295	NA_NA_NA_NA_NA_NA_NA_NA_NA_NA_NA_NA_NA	0.0066
1270	464.599	3	0.00210974	ARNTVTQVLSRF	FALSE	12	Q9P2B4	NA_NA_NA_NA_NA_NA_NA_NA_NA_NA_NA_NA_NA_NA	0.0066
1271	454.568	3	0.000891069	YRFGQVYTEAK	FALSE	11	P46977	NA_NA_NA_NA_NA_NA_NA_NA_NA_NA_NA_NA_NA	0.0066
1272	731.892	2	0.00138162	LQMLQSRLPVDY	FALSE	12	Q5T6F2	NA_NA_NA_NA_NA_NA_NA_NA_NA_NA_NA_NA_NA_NA	0.0066
1273	661.33	2	-0.000650383	GRISPQTVWDY	FALSE	11	Q92576	NA_NA_NA_NA_NA_NA_NA_NA_NA_NA_NA_NA_NA	0.0066
1274	491.787	2	-0.00118988	QRTGLSPLK	FALSE	9	P0C7P0	pyrGlu_NA_NA_NA_NA_NA_NA_NA_NA_NA_NA	0.0066
1275	512.299	2	0.000940116	FYLGQVAIL	FALSE	9	P63167	NA_NA_NA_NA_NA_NA_NA_NA_NA_NA_NA	0.0066
1276	638.322	2	-0.000993881	YRGDFETFIK	FALSE	10	Q9NUQ8	NA_NA_NA_NA_NA_NA_NA_NA_NA_NA_NA_NA	0.0066
1277	425.579	3	-0.000448596	AQFKPSSQILR	FALSE	11	Q9NP80	NA_NA_NA_NA_NA_NA_NA_NA_NA_NA_NA_NA_NA	0.0066
1278	478.218	2	-0.00138288	GRSDAICSF	FALSE	9	Q14CB8	NA_NA_NA_NA_NA_NA_NA_NA_NA_NA_NA	0.0066
1279	401.904	3	-0.000796267	HRIYGKFLGL	FALSE	10	Q14738	NA_NA_NA_NA_NA_NA_NA_NA_NA_NA_NA_NA	0.0066
1280	447.933	3	-0.000291262	KRINAEIEKQL	FALSE	11	P29992	NA_NA_NA_NA_NA_NA_NA_NA_NA_NA_NA_NA_NA	0.0066
1281	590.328	2	-0.00172238	ARFLLEGQVF	FALSE	10	Q8IY37	NA_NA_NA_NA_NA_NA_NA_NA_NA_NA_NA_NA	0.0066
1282	501.292	2	-0.00100838	GRILLPEGF	FALSE	9	Q562E7	NA_NA_NA_NA_NA_NA_NA_NA_NA_NA_NA	0.0066
1283	495.316	3	-0.000123932	KRLEIEKSLLVR	FALSE	12	Q96BQ5	NA_NA_NA_NA_NA_NA_NA_NA_NA_NA_NA_NA_NA_NA	0.0066
1284	433.915	3	-0.000683593	LRVPFLDHRF	FALSE	10	P08243	NA_NA_NA_NA_NA_NA_NA_NA_NA_NA_NA_NA	0.0065
1285	628.815	2	0.000286118	GRYDMAQLRF	FALSE	10	Q6P1Q9	NA_NA_NA_NA_NA_NA_NA_NA_NA_NA_NA_NA	0.0065
1286	516.293	3	-0.00210026	QRIGLSSQELFRL	FALSE	13	P62324	NA_NA_NA_NA_NA_NA_NA_NA_NA_NA_NA_NA_NA_NA_NA	0.0065
1287	543.301	2	-0.00116138	QRNEVVVEL	FALSE	9	O00629	NA_NA_NA_NA_NA_NA_NA_NA_NA_NA_NA	0.0065
1288	460.264	3	-0.000607262	MRYIPPIPVHR	FALSE	11	Q12789	NA_NA_NA_NA_NA_NA_NA_NA_NA_NA_NA_NA_NA	0.0065
1289	628.824	2	-0.000904382	QRLGTQPYFF	FALSE	10	O75431	NA_NA_NA_NA_NA_NA_NA_NA_NA_NA_NA_NA	0.0065
1290	381.892	3	-0.00086793	ARFGPGGQLIK	FALSE	11	O15027	NA_NA_NA_NA_NA_NA_NA_NA_NA_NA_NA_NA_NA	0.0065
1291	593.838	2	-0.00074588	KRANPQVGVAF	FALSE	11	P13010	NA_NA_NA_NA_NA_NA_NA_NA_NA_NA_NA_NA_NA	0.0065
1292	381.21	3	-0.000196592	ARFFKQPTF	FALSE	9	P05129	NA_NA_NA_NA_NA_NA_NA_NA_NA_NA_NA	0.0065
1293	627.256	2	-0.00215588	GRMEPMNSNSM	FALSE	11	Q9Y6Q9	NA_NA_NA_NA_NA_NA_NA_NA_NA_NA_NA_NA_NA	0.0065
1294	488.767	2	0.000299616	ARVQTAVTM	FALSE	9	Q7LBR1	NA_NA_NA_NA_NA_NA_NA_NA_NA_NA_NA	0.0065
1295	370.859	3	0.000165072	SRFEEAMKL	FALSE	9	P49069	NA_NA_NA_NA_NA_NA_NA_NA_NA_NA_NA	0.0065
1296	367.238	3	2.50677e-05	FRNPLKVLL	FALSE	9	Q9Y2L5	NA_NA_NA_NA_NA_NA_NA_NA_NA_NA_NA	0.0065
1297	540.288	2	-0.00108588	ARVKMQVTM	FALSE	9	Q96N67	NA_NA_NA_NA_NA_NA_NA_NA_NA_MetOX_NA	0.0065
1298	634.389	2	-0.00352188	TRLPPTPLLLF	FALSE	11	Q9Y679	NA_NA_NA_NA_NA_NA_NA_NA_NA_NA_NA_NA_NA	0.0065
1299	487.775	2	-0.00196838	TRAAIMQAL	FALSE	9	Q92925	NA_NA_NA_NA_NA_NA_NA_NA_NA_NA_NA	0.0065
1300	563.851	2	-0.00082138	KRLLLQNEL	FALSE	9	Q13464	NA_NA_NA_NA_NA_NA_NA_NA_NA_NA_NA	0.0065
1301	447.237	3	0.000182732	ARYMPQNPHII	FALSE	11	Q16576	NA_NA_NA_NA_NA_NA_NA_NA_NA_NA_NA_NA_NA	0.0065
1302	553.814	2	9.56158e-05	LRLSGLDVSF	FALSE	10	Q8N1E6	NA_NA_NA_NA_NA_NA_NA_NA_NA_NA_NA_NA	0.0065
1303	617.857	2	0.000362118	RRFVNVVPTF	FALSE	10	P62861	NA_NA_NA_NA_NA_NA_NA_NA_NA_NA_NA_NA	0.0065
1304	665.846	2	-0.00381038	SRFHIPQVAEF	FALSE	11	Q6P1M0	NA_NA_NA_NA_NA_NA_NA_NA_NA_NA_NA_NA_NA	0.0065
1305	541.784	2	-0.00144788	YRIGDLQAF	FALSE	9	P08195	NA_NA_NA_NA_NA_NA_NA_NA_NA_NA_NA	0.0065
1306	567.268	2	0.000538617	GRIEDLNEGM	FALSE	10	Q8N3U4	NA_NA_NA_NA_NA_NA_NA_NA_NA_NA_NA_NA	0.0065
1307	443.561	3	-0.00105727	RRLEPPSSSHY	FALSE	11	Q9HAS0	NA_NA_NA_NA_NA_NA_NA_NA_NA_NA_NA_NA_NA	0.0064
1308	433.219	3	-0.0012436	HRAQYEPLFH	FALSE	10	O00329	NA_NA_NA_NA_NA_NA_NA_NA_NA_NA_NA_NA	0.0064
1309	707.366	2	0.00384862	PQFYPLGIVQHD	FALSE	12	B5MC59	NA_NA_NA_NA_NA_NA_NA_NA_NA_NA_NA_NA_NA_NA	0.0067
1310	584.321	2	0.00134262	ARNIWYFVV	FALSE	9	Q8WVX9	NA_NA_NA_NA_NA_NA_NA_NA_NA_NA_NA	0.0067
1311	402.566	3	0.00134907	TRYLKQFHL	FALSE	9	P30419	NA_NA_NA_NA_NA_NA_NA_NA_NA_NA_NA	0.0067
1312	555.257	2	-0.00128238	QRCGVEVTSM	FALSE	10	P33121	NA_NA_NA_NA_NA_NA_NA_NA_NA_NA_NA_NA	0.0067
1313	512.767	2	0.000199622	GRNMYLTGL	FALSE	9	P20702	NA_NA_NA_NA_NA_NA_NA_NA_NA_NA_NA	0.0067
1314	676.833	2	-0.00294288	KRNVEGQDMLY	FALSE	11	Q10567	NA_NA_NA_NA_NA_NA_NA_NA_NA_NA_NA_NA_NA	0.0067
1315	678.85	2	-0.00280438	GRIYLDMLNVY	FALSE	11	O14980	NA_NA_NA_NA_NA_NA_NA_NA_NA_NA_NA_NA_NA	0.0067
1316	619.275	2	-0.000120879	HRWVNYESM	FALSE	9	Q7L1T6	NA_NA_NA_NA_NA_NA_NA_NA_NA_MetOX_NA	0.0067
1317	569.28	2	-0.000526376	GRLQVDSAEY	FALSE	10	P10588	NA_NA_NA_NA_NA_NA_NA_NA_NA_NA_NA_NA	0.0067
1318	796.409	2	-0.000728378	TRFFTKLDADKSY	FALSE	13	O14757	NA_NA_NA_NA_NA_NA_NA_NA_NA_NA_NA_NA_NA_NA_NA	0.0067
1319	502.781	2	0.000735123	LRFDGALNV	FALSE	9	P68363	NA_NA_NA_NA_NA_NA_NA_NA_NA_NA_NA	0.0067
1320	449.261	2	-0.000507876	GRAPLSPSL	FALSE	9	Q6P3S6	NA_NA_NA_NA_NA_NA_NA_NA_NA_NA_NA	0.0067
1321	560.349	2	-0.00483188	ARLQIVLGHL	FALSE	10	O14832	NA_NA_NA_NA_NA_NA_NA_NA_NA_NA_NA_NA	0.0067
1322	514.817	2	-0.00183638	GRVIQIVLM	FALSE	9	Q05655	NA_NA_NA_NA_NA_NA_NA_NA_NA_NA_NA	0.0067
1323	469.251	3	-0.00180126	GRLPVDLAEELGH	FALSE	13	P42771-4	NA_NA_NA_NA_NA_NA_NA_NA_NA_NA_NA_NA_NA_NA_NA	0.0067
1324	599.796	2	-0.000343382	GRSTGEAFVQF	FALSE	11	P31943	NA_NA_NA_NA_NA_NA_NA_NA_NA_NA_NA_NA_NA	0.0067
1325	426.576	3	-0.000762259	QRFGELMRKL	FALSE	10	Q53GS9	NA_NA_NA_NA_NA_NA_NA_NA_NA_NA_NA_NA	0.0067
1326	468.277	3	-6.95925e-05	ARARIVAEEFLK	FALSE	12	P59998	NA_NA_NA_NA_NA_NA_NA_NA_NA_NA_NA_NA_NA_NA	0.0067
1327	595.343	2	-2.53772e-05	ARSELLTTVSL	FALSE	11	Q12789	NA_NA_NA_NA_NA_NA_NA_NA_NA_NA_NA_NA_NA	0.0067
1328	663.309	2	-0.00204938	MRYFYTAMSR	FALSE	10	P30485	NA_NA_NA_NA_NA_NA_NA_NA_NA_NA_NA_NA	0.0067
1329	543.788	2	-0.00092138	SRIHVPASGY	FALSE	10	Q92610	NA_NA_NA_NA_NA_NA_NA_NA_NA_NA_NA_NA	0.0067
1330	551.971	3	0.000306068	KRFEKQKEVIEGY	FALSE	13	Q9Y6A5	NA_NA_NA_NA_NA_NA_NA_NA_NA_NA_NA_NA_NA_NA_NA	0.0067
1331	437.869	3	7.07062e-06	GRNSNICHYTF	FALSE	11	Q96CG3	NA_NA_NA_NA_NA_NA_NA_NA_NA_NA_NA_NA_NA	0.0067
1332	413.568	3	0.000480074	HRSDVEAIAKL	FALSE	11	Q9BQA9	NA_NA_NA_NA_NA_NA_NA_NA_NA_NA_NA_NA_NA	0.0067
1333	644.345	2	-0.000777879	ARLAALEEQRM	FALSE	11	O00541	NA_NA_NA_NA_NA_NA_NA_NA_NA_NA_NA_NA_NA	0.0067
1334	420.228	3	0.00060174	RQFADPGALQR	FALSE	11	Q13105	NA_NA_NA_NA_NA_NA_NA_NA_NA_NA_NA_NA_NA	0.0067
1335	403.905	3	-7.2928e-05	VRFIGELTKF	FALSE	10	Q9HAU5	NA_NA_NA_NA_NA_NA_NA_NA_NA_NA_NA_NA	0.0068
1336	776.412	2	-0.00598838	ARNPSLKQQLFSY	FALSE	13	P48201	NA_NA_NA_NA_NA_NA_NA_NA_NA_NA_NA_NA_NA_NA_NA	0.0068
1337	517.792	2	-0.000875878	QRVPFGALF	FALSE	9	Q7RTV5	NA_NA_NA_NA_NA_NA_NA_NA_NA_NA_NA	0.0068
1338	493.775	2	-0.00503038	KAVDPSSVAL	FALSE	10	Q8TEM1	NA_NA_NA_NA_NA_NA_NA_NA_NA_NA_NA_NA	0.0068
1339	432.93	3	0.000118738	IRIPRTVGQEK	FALSE	11	P15104	NA_NA_NA_NA_NA_NA_NA_NA_NA_NA_NA_NA_NA	0.0068
1340	359.879	3	-0.000158267	GRLWSKAIF	FALSE	9	P18077	NA_NA_NA_NA_NA_NA_NA_NA_NA_NA_NA	0.0068
1341	577.814	2	-4.37758e-06	IRTDFNILY	FALSE	9	Q09328	NA_NA_NA_NA_NA_NA_NA_NA_NA_NA_NA	0.0068
1342	486.297	2	-0.000990382	GRTLILEGL	FALSE	9	A3KMH1	NA_NA_NA_NA_NA_NA_NA_NA_NA_NA_NA	0.0068
1343	477.306	2	0.000715622	IILPKELQ	FALSE	8	Q16670	NA_NA_NA_NA_NA_NA_NA_NA_NA_NA	0.0068
1344	679.381	2	-0.00402888	HRLVLPIAYEF	FALSE	11	Q9UBN7	NA_NA_NA_NA_NA_NA_NA_NA_NA_NA_NA_NA_NA	0.0068
1345	514.271	2	-0.00124938	SRIHPVSTM	FALSE	9	P07195	NA_NA_NA_NA_NA_NA_NA_NA_NA_NA_NA	0.0068
1346	521.299	2	0.00241812	SRHPFLTAL	FALSE	9	P31749	NA_NA_NA_NA_NA_NA_NA_NA_NA_NA_NA	0.0068
1347	477.791	2	-0.000132881	GTPRGGALLL	FALSE	10	Q9UL54-2	NA_NA_NA_NA_NA_NA_NA_NA_NA_NA_NA_NA	0.0068
1348	520.815	2	-0.00145088	IRQIIPPGF	FALSE	9	O14929	NA_NA_NA_NA_NA_NA_NA_NA_NA_NA_NA	0.0068
1349	585.818	2	-0.000664376	QRLEGIVNKM	FALSE	10	Q99460	pyrGlu_NA_NA_NA_NA_NA_NA_NA_NA_NA_NA_NA	0.0068
1350	696.86	2	0.00236412	QRYFQPPGTWI	FALSE	11	Q96D46	NA_NA_NA_NA_NA_NA_NA_NA_NA_NA_NA_NA_NA	0.0068
1352	537.291	2	-0.00178238	GRVDNLAVVM	FALSE	10	P58004	NA_NA_NA_NA_NA_NA_NA_NA_NA_NA_NA_NA	0.0068
1353	409.227	3	-0.00142693	SRFFSLAERL	FALSE	10	P41002	NA_NA_NA_NA_NA_NA_NA_NA_NA_NA_NA_NA	0.0068
1354	531.978	3	-0.00254726	RRMLLAHVDLIEK	FALSE	13	P62875	NA_NA_NA_NA_NA_NA_NA_NA_NA_NA_NA_NA_NA_NA_NA	0.0068
1355	565.787	2	-0.00406438	HRFAEPIGGF	FALSE	10	Q9Y570	NA_NA_NA_NA_NA_NA_NA_NA_NA_NA_NA_NA	0.0068
1356	383.224	3	-0.00130559	SRAGPLSGKKF	FALSE	11	P17844	NA_NA_NA_NA_NA_NA_NA_NA_NA_NA_NA_NA_NA	0.0067
1357	561.317	2	-0.00315388	VRVIISNSAY	FALSE	10	O43824	NA_NA_NA_NA_NA_NA_NA_NA_NA_NA_NA_NA	0.0067
1358	522.335	2	0.000223624	ARLYPVLLV	FALSE	9	Q7Z7F7	NA_NA_NA_NA_NA_NA_NA_NA_NA_NA_NA	0.0067
1360	578.294	2	-0.00224788	SRFPELYPF	FALSE	9	Q6YHU6	NA_NA_NA_NA_NA_NA_NA_NA_NA_NA_NA	0.0067
1361	510.296	2	-0.00188988	IRFTSPVSL	FALSE	9	Q86YC2	NA_NA_NA_NA_NA_NA_NA_NA_NA_NA_NA	0.0067
1362	542.795	2	0.00112762	SRYSFIQAL	FALSE	9	Q92621	NA_NA_NA_NA_NA_NA_NA_NA_NA_NA_NA	0.0067
1363	609.817	2	-0.00216388	ARMNEVISLW	FALSE	10	Q13813	NA_NA_NA_NA_NA_NA_NA_NA_NA_NA_NA_NA	0.0067
1364	521.255	2	-0.000765379	ARTPVMSTY	FALSE	9	P55786	NA_NA_NA_NA_NA_NA_MetOX_NA_NA_NA_NA	0.0067
1365	555.335	2	-0.00314738	QRLDLQIKL	FALSE	9	Q8IV50	pyrGlu_NA_NA_NA_NA_NA_NA_NA_NA_NA_NA	0.0067
1366	486.296	2	0.00302612	IEKQVLEL	FALSE	8	Q9H330	NA_NA_NA_NA_NA_NA_NA_NA_NA_NA	0.0067
1367	535.285	2	-0.00312238	SRLDTIFFA	FALSE	9	Q9Y5K5	NA_NA_NA_NA_NA_NA_NA_NA_NA_NA_NA	0.0067
1368	584.815	2	-0.000170882	ARYPHAAVNGL	FALSE	11	Q9Y3B6	NA_NA_NA_NA_NA_NA_NA_NA_NA_NA_NA_NA_NA	0.0067
1369	490.761	2	-0.000771884	SRVNVSVGY	FALSE	9	Q8N3I7	NA_NA_NA_NA_NA_NA_NA_NA_NA_NA_NA	0.0067
1370	469.764	2	-0.000818384	GRFLGKGGF	FALSE	9	P53350	NA_NA_NA_NA_NA_NA_NA_NA_NA_NA_NA	0.0067
1371	542.325	2	0.000794618	AAVVENVVKL	FALSE	10	Q92785	Ac_NA_NA_NA_NA_NA_NA_NA_NA_NA_NA_NA	0.0067
1372	473.914	3	-0.000696592	KRFTEEATKYF	FALSE	11	O95236	NA_NA_NA_NA_NA_NA_NA_NA_NA_NA_NA_NA_NA	0.0067
1373	642.346	2	-0.000434882	GRYDKTQLRF	FALSE	10	B3KW44	NA_NA_NA_NA_NA_NA_NA_NA_NA_NA_NA_NA	0.0067
1375	468.269	2	-0.00103288	GRLGSTVFV	FALSE	9	P52272	NA_NA_NA_NA_NA_NA_NA_NA_NA_NA_NA	0.0067
1376	511.287	2	-0.000922378	ARSLDSFLL	FALSE	9	Q9Y5L0	NA_NA_NA_NA_NA_NA_NA_NA_NA_NA_NA	0.0067
1377	545.822	2	-0.000264378	KRNGVIIAGY	FALSE	10	Q9UKF6	NA_NA_NA_NA_NA_NA_NA_NA_NA_NA_NA_NA	0.0067
1378	493.295	2	0.000860615	SRVAVVNQI	FALSE	9	Q01082	NA_NA_NA_NA_NA_NA_NA_NA_NA_NA_NA	0.0067
1379	519.307	3	-0.000439931	RRFIVSPVPESRL	FALSE	13	Q9H4A3	NA_NA_NA_NA_NA_NA_NA_NA_NA_NA_NA_NA_NA_NA_NA	0.0067
1380	486.315	2	-0.00178288	ARVVLTSLL	FALSE	9	Q16690	NA_NA_NA_NA_NA_NA_NA_NA_NA_NA_NA	0.0067
1381	362.19	3	0.000227738	GRWTDILSH	FALSE	9	Q9P2D1	NA_NA_NA_NA_NA_NA_NA_NA_NA_NA_NA	0.0067
1382	575.301	2	0.00208112	FDAGELITQR	FALSE	10	P35232	NA_NA_NA_NA_NA_NA_NA_NA_NA_NA_NA_NA	0.0067
1383	528.302	2	-0.00170738	HRSPLVLAY	FALSE	9	Q6GQQ9	NA_NA_NA_NA_NA_NA_NA_NA_NA_NA_NA	0.0067
1384	550.789	2	-0.00182938	SRFAGYVTSI	FALSE	10	O75533	NA_NA_NA_NA_NA_NA_NA_NA_NA_NA_NA_NA	0.0067
1386	501.789	2	-0.00183288	KRGDFIPGL	FALSE	9	P08559	NA_NA_NA_NA_NA_NA_NA_NA_NA_NA_NA	0.0067
1387	493.803	2	0.00447662	DLGKASGLLL	FALSE	10	Q96S19	NA_NA_NA_NA_NA_NA_NA_NA_NA_NA_NA_NA	0.0067
1388	516.306	2	0.00199262	GRFGPLASVK	FALSE	10	O15042	NA_NA_NA_NA_NA_NA_NA_NA_NA_NA_NA_NA	0.0067
1389	474.297	2	-0.00350188	VAILLFKSG	FALSE	9	P63167	NA_NA_NA_NA_NA_NA_NA_NA_NA_NA_NA	0.0067
1390	605.815	2	-0.00152138	KRISEQFTAM	FALSE	10	P68371	NA_NA_NA_NA_NA_NA_NA_NA_NA_NA_NA_NA	0.0067
1391	420.888	3	6.7408e-06	VRWAPNENKF	FALSE	10	O15143	NA_NA_NA_NA_NA_NA_NA_NA_NA_NA_NA_NA	0.0067
1392	358.217	3	0.00247074	HRFVSVSKL	FALSE	9	O95070	NA_NA_NA_NA_NA_NA_NA_NA_NA_NA_NA	0.007
1393	453.277	3	4.24027e-05	ARLLQTSNITKL	FALSE	12	O75914	NA_NA_NA_NA_NA_NA_NA_NA_NA_NA_NA_NA_NA_NA	0.007
1394	422.23	3	0.000760734	RMLDPSIKGTF	FALSE	11	Q9NZL9	NA_NA_NA_NA_NA_NA_NA_NA_NA_NA_NA_NA_NA	0.007
1396	488.782	2	-0.000507379	ARFSGNLLV	FALSE	9	P61619	NA_NA_NA_NA_NA_NA_NA_NA_NA_NA_NA	0.007
1397	506.748	2	0.00107762	GRYPGVSNY	FALSE	9	Q13564	NA_NA_NA_NA_NA_NA_NA_NA_NA_NA_NA	0.007
1398	566.844	2	-0.00213938	ARLDLLYRL	FALSE	9	O95071	NA_NA_NA_NA_NA_NA_NA_NA_NA_NA_NA	0.007
1399	524.739	2	0.000306621	SRWDETPAS	FALSE	9	O75533	NA_NA_NA_NA_NA_NA_NA_NA_NA_NA_NA	0.007
1400	553.81	2	0.00141212	GNALEIYLTL	FALSE	10	P49754	NA_NA_NA_NA_NA_NA_NA_NA_NA_NA_NA_NA	0.007
1401	552.315	2	0.000828121	GRFDITIGPK	FALSE	10	Q9Y2T2	NA_NA_NA_NA_NA_NA_NA_NA_NA_NA_NA_NA	0.007
1402	378.881	3	-0.00347193	KRFEGLTQR	FALSE	9	Q9Y2H1	NA_NA_NA_NA_NA_NA_NA_NA_NA_NA_NA	0.007
1403	595.266	2	-0.00370388	FRMDSSATQF	FALSE	10	A2VDJ0	NA_NA_NA_NA_NA_NA_NA_NA_NA_NA_NA_NA	0.007
1404	454.258	3	-0.000174934	LRYLEVEPVSR	FALSE	11	Q9UKR5	NA_NA_NA_NA_NA_NA_NA_NA_NA_NA_NA_NA_NA	0.007
1405	545.803	2	-0.00117138	SRQGGLLVNF	FALSE	10	Q86VP6	NA_NA_NA_NA_NA_NA_NA_NA_NA_NA_NA_NA	0.007
1406	614.322	2	-0.000893882	ARIDFKDVTY	FALSE	10	Q05086	NA_NA_NA_NA_NA_NA_NA_NA_NA_NA_NA_NA	0.0071
1407	445.914	3	-0.000496928	QRVAELDKITY	FALSE	11	Q9NTJ3	NA_NA_NA_NA_NA_NA_NA_NA_NA_NA_NA_NA_NA	0.0071
1408	656.864	2	-0.00366888	GRLPLPSPALEY	FALSE	12	Q8IU81	NA_NA_NA_NA_NA_NA_NA_NA_NA_NA_NA_NA_NA_NA	0.0071
1410	544.297	2	-0.00232138	ARWDLISNL	FALSE	9	Q6ZWT7	NA_NA_NA_NA_NA_NA_NA_NA_NA_NA_NA	0.0073
1411	452.905	3	0.000456067	ERMFLSFPTTK	FALSE	11	P69905	NA_NA_NA_NA_NA_NA_NA_NA_NA_NA_NA_NA_NA	0.0073
1412	443.908	3	0.000423402	HRWSIGKAIDF	FALSE	11	Q8TCF1	NA_NA_NA_NA_NA_NA_NA_NA_NA_NA_NA_NA_NA	0.0073
1413	405.865	3	0.000134073	TRYDLYHTF	FALSE	9	Q9BVK8	NA_NA_NA_NA_NA_NA_NA_NA_NA_NA_NA	0.0073
1414	363.878	3	0.000682404	ARLAQRIDF	FALSE	9	Q9NVC6	NA_NA_NA_NA_NA_NA_NA_NA_NA_NA_NA	0.0073
1415	567.238	2	-3.88456e-06	GRNDMTYNY	FALSE	9	O14497	NA_NA_NA_NA_NA_NA_NA_NA_NA_NA_NA	0.0073
1416	455.575	3	-0.000709265	GRFINNNAVTKM	FALSE	12	Q13616	NA_NA_NA_NA_NA_NA_NA_NA_NA_NA_NA_NA_NA_NA	0.0073
1417	449.261	2	-0.000807875	SRLSPPAGL	FALSE	9	P42229	NA_NA_NA_NA_NA_NA_NA_NA_NA_NA_NA	0.0073
1418	534.84	2	-0.00276538	LRAQIIELL	FALSE	9	Q9Y5K6	NA_NA_NA_NA_NA_NA_NA_NA_NA_NA_NA	0.0073
1419	516.776	2	-0.00706938	GINDSVTITI	FALSE	10	Q8WXG9	NA_NA_NA_NA_NA_NA_NA_NA_NA_NA_NA_NA	0.0073
1420	454.926	3	-0.000359598	QRWLTVERKF	FALSE	10	Q6NUQ1	NA_NA_NA_NA_NA_NA_NA_NA_NA_NA_NA_NA	0.0073
1421	684.358	2	-0.0126444	KRWWSAGGGLLH	FALSE	12	Q9Y4A8	NA_NA_NA_NA_NA_NA_NA_NA_NA_NA_NA_NA_NA_NA	0.0073
1422	553.814	2	9.562e-05	KRLATEFEL	FALSE	9	A5YKK6	NA_NA_NA_NA_NA_NA_NA_NA_NA_NA_NA	0.0073
1423	400.9	3	-0.00062193	RRWGDSVLLV	FALSE	10	Q9BYD3	NA_NA_NA_NA_NA_NA_NA_NA_NA_NA_NA_NA	0.0073
1424	587.779	2	-0.00136238	VRYYPSGDAF	FALSE	10	O14775	NA_NA_NA_NA_NA_NA_NA_NA_NA_NA_NA_NA	0.0073
1425	608.373	2	0.00104512	LLIPTSFSPLK	FALSE	11	Q9UFN0	NA_NA_NA_NA_NA_NA_NA_NA_NA_NA_NA_NA_NA	0.0073
1426	563.253	2	-0.00125388	SRDDNMFQI	FALSE	9	P53999	NA_NA_NA_NA_NA_NA_NA_NA_NA_NA_NA	0.0073
1427	547.272	2	-0.00304688	ARFPDVANGF	FALSE	10	Q9NWF9	NA_NA_NA_NA_NA_NA_NA_NA_NA_NA_NA_NA	0.0073
1428	536.336	2	0.00188112	MRLSLPLLL	FALSE	9	Q8WU39	NA_MetOX_NA_NA_NA_NA_NA_NA_NA_NA_NA	0.0073
1429	591.317	2	-0.00285438	KRLDAFIDGF	FALSE	10	Q8N4N3	NA_NA_NA_NA_NA_NA_NA_NA_NA_NA_NA_NA	0.0073
1431	485.248	2	-0.000162879	LSEIEEHL	FALSE	8	Q92499	NA_NA_NA_NA_NA_NA_NA_NA_NA_NA	0.0073
1432	489.259	2	0.000391618	KRDAVEMI	FALSE	8	Q69YN4-2	NA_NA_NA_NA_NA_NA_NA_MetOX_NA_NA	0.0073
1433	503.787	2	-0.00148938	SRFGTLVNL	FALSE	9	Q5T8P6	NA_NA_NA_NA_NA_NA_NA_NA_NA_NA_NA	0.0073
1434	429.888	3	0.00135907	ARVTPDTDWAR	FALSE	11	P53396	NA_NA_NA_NA_NA_NA_NA_NA_NA_NA_NA_NA_NA	0.0073
1435	402.893	3	-0.00035593	VRWSPKGTYL	FALSE	10	P55884	NA_NA_NA_NA_NA_NA_NA_NA_NA_NA_NA_NA	0.0073
1438	423.226	3	-2.92667e-05	MRFPPKSYNK	FALSE	10	O43242	NA_NA_NA_NA_NA_NA_NA_NA_NA_NA_NA_NA	0.0073
1439	655.319	2	0.00304512	YRYIGKTMDY	FALSE	10	Q96A35	NA_NA_NA_NA_NA_NA_NA_NA_NA_NA_NA_NA	0.0073
1440	654.81	2	-0.00197138	ARLQDQHMFY	FALSE	10	Q9H2D1	NA_NA_NA_NA_NA_NA_NA_NA_NA_NA_NA_NA	0.0073
1442	463.926	3	0.00039274	RRNAVLEADFAK	FALSE	12	Q99436	NA_NA_NA_NA_NA_NA_NA_NA_NA_NA_NA_NA_NA_NA	0.0072
1443	444.906	3	-0.00258893	GRIYLEPPTMR	FALSE	11	Q9H4A5	NA_NA_NA_NA_NA_NA_NA_NA_NA_NA_NA_NA_NA	0.0072
1444	440.894	3	-0.00103626	SRHNIEGIFTF	FALSE	11	P27540	NA_NA_NA_NA_NA_NA_NA_NA_NA_NA_NA_NA_NA	0.0072
1445	401.981	4	0.00010705	RRLDIAGRDITRY	FALSE	13	P61160	NA_NA_NA_NA_NA_NA_NA_NA_NA_NA_NA_NA_NA_NA_NA	0.0072
1446	421.236	3	-0.00331493	IRDIRASVGAGF	FALSE	12	P11586	NA_NA_NA_NA_NA_NA_NA_NA_NA_NA_NA_NA_NA_NA	0.0072
1447	551.833	2	-0.00214038	YRQPIIISI	FALSE	9	Q8TDB8	NA_NA_NA_NA_NA_NA_NA_NA_NA_NA_NA	0.0072
1448	553.301	2	-0.00350388	ARFGSVNELL	FALSE	10	Q13129	NA_NA_NA_NA_NA_NA_NA_NA_NA_NA_NA_NA	0.0072
1449	606.311	2	-0.00196038	RRFAPDISSY	FALSE	10	Q969F9	NA_NA_NA_NA_NA_NA_NA_NA_NA_NA_NA_NA	0.0072
1450	430.252	3	0.000868074	ARFTGVGVSKGPL	FALSE	13	Q86UE8	NA_NA_NA_NA_NA_NA_NA_NA_NA_NA_NA_NA_NA_NA_NA	0.0072
1451	490.337	2	-0.000618881	ARIALLPLL	FALSE	9	Q9P0J0	NA_NA_NA_NA_NA_NA_NA_NA_NA_NA_NA	0.0072
1452	659.313	2	0.00163062	IRVYMGDSDVY	FALSE	11	Q6P0Q8	NA_NA_NA_NA_NA_NA_NA_NA_NA_NA_NA_NA_NA	0.0072
1453	608.823	2	-0.00233538	QRAEIYALNR	FALSE	10	Q8N300	pyrGlu_NA_NA_NA_NA_NA_NA_NA_NA_NA_NA_NA	0.0072
1454	435.219	3	0.000321402	SRSQTSSFFTR	FALSE	11	Q969K3	NA_NA_NA_NA_NA_NA_NA_NA_NA_NA_NA_NA_NA	0.0072
1455	621.317	2	-0.00335438	FRFDPQFALT	FALSE	10	P01909	NA_NA_NA_NA_NA_NA_NA_NA_NA_NA_NA_NA	0.008
1456	697.852	2	-0.00176938	TRFSHGKGNMFL	FALSE	12	Q8IXQ4	NA_NA_NA_NA_NA_NA_NA_NA_NA_NA_NA_NA_NA_NA	0.008
1457	406.875	3	-0.00040826	IRFFPDGHVM	FALSE	10	Q9UK97	NA_NA_NA_NA_NA_NA_NA_NA_NA_NA_NA_NA	0.008
1458	451.899	3	0.000553733	SRFPDENFTLK	FALSE	11	P30405	NA_NA_NA_NA_NA_NA_NA_NA_NA_NA_NA_NA_NA	0.008
1459	532.277	2	-0.000632378	MRMATPLLM	FALSE	9	P04233	NA_NA_NA_NA_NA_NA_NA_NA_NA_NA_NA	0.008
1460	399.21	3	-0.000356596	YRADIKEMGL	FALSE	10	P02786	NA_NA_NA_NA_NA_NA_NA_NA_NA_NA_NA_NA	0.008
1461	554.805	2	0.00136362	SRSEFLEKL	FALSE	9	Q9ULT8	NA_NA_NA_NA_NA_NA_NA_NA_NA_NA_NA	0.008
1462	398.224	3	-0.000416934	HRVFLPSHSL	FALSE	10	O94966	NA_NA_NA_NA_NA_NA_NA_NA_NA_NA_NA_NA	0.008
1464	491.803	2	-0.00298238	GRNIPVTLI	FALSE	9	Q9NXN4	NA_NA_NA_NA_NA_NA_NA_NA_NA_NA_NA	0.008
1465	516.3	2	0.00524062	LTALCDILGL	FALSE	10	Q5TG30	NA_NA_NA_NA_NA_NA_NA_NA_NA_NA_NA_NA	0.008
1466	546.811	2	-0.00300838	ARIFGYPVGI	FALSE	10	Q9HCC0	NA_NA_NA_NA_NA_NA_NA_NA_NA_NA_NA_NA	0.008
1467	472.27	2	-0.000263881	GRASVNNLL	FALSE	9	Q6YHU6	NA_NA_NA_NA_NA_NA_NA_NA_NA_NA_NA	0.008
1468	522.3	2	2.41181e-05	VRVEPLVTM	FALSE	9	Q15392	NA_NA_NA_NA_NA_NA_NA_NA_NA_NA_NA	0.008
1469	570.812	2	0.000203617	SRYFALVER	FALSE	9	Q9UID3	NA_NA_NA_NA_NA_NA_NA_NA_NA_NA_NA	0.008
1470	510.298	2	-0.000590378	GRDSLIFLV	FALSE	9	P12956	NA_NA_NA_NA_NA_NA_NA_NA_NA_NA_NA	0.008
1471	531.986	3	-0.00230726	KRYWTKTIEKKL	FALSE	12	P52701	NA_NA_NA_NA_NA_NA_NA_NA_NA_NA_NA_NA_NA_NA	0.008
1472	395.577	3	-0.000167926	KRYKSIVKY	FALSE	9	P14324	NA_NA_NA_NA_NA_NA_NA_NA_NA_NA_NA	0.008
1473	358.196	3	0.000741739	FRFPGALQH	FALSE	9	Q9NUA8	NA_NA_NA_NA_NA_NA_NA_NA_NA_NA_NA	0.008
1474	399.571	3	-0.0017286	RRHALIVQGF	FALSE	10	Q9Y5Q9	NA_NA_NA_NA_NA_NA_NA_NA_NA_NA_NA_NA	0.008
1475	586.3	2	-0.000307377	TRFDQVMKF	FALSE	9	Q9HCN4	NA_NA_NA_NA_NA_NA_NA_NA_NA_NA_NA	0.008
1476	527.769	2	-0.00139788	GRGQVFVEY	FALSE	9	Q8TAS1	NA_NA_NA_NA_NA_NA_NA_NA_NA_NA_NA	0.008
1477	517.275	2	-0.000445877	SRSHSIFSI	FALSE	9	O95235	NA_NA_NA_NA_NA_NA_NA_NA_NA_NA_NA	0.008
1478	591.794	2	0.000730619	VRFSPDGELY	FALSE	10	Q9Y3F4	NA_NA_NA_NA_NA_NA_NA_NA_NA_NA_NA_NA	0.008
1480	661.356	2	-0.00410788	QRLKVEDALSY	FALSE	11	Q96ST3	NA_NA_NA_NA_NA_NA_NA_NA_NA_NA_NA_NA_NA	0.008
1482	523.295	2	-0.000225881	GRLLQQLAM	FALSE	9	Q14C86	NA_NA_NA_NA_NA_NA_NA_NA_NA_MetOX_NA	0.008
1483	495.306	2	0.000415124	YLGQVAILL	FALSE	9	P63167	NA_NA_NA_NA_NA_NA_NA_NA_NA_NA_NA	0.008
1484	375.877	3	-0.00041726	GRWKDILTH	FALSE	9	Q8TD26	NA_NA_NA_NA_NA_NA_NA_NA_NA_NA_NA	0.008
1485	396.231	3	0.0014204	HRIEIPFKF	FALSE	9	Q86X55	NA_NA_NA_NA_NA_NA_NA_NA_NA_NA_NA	0.008
1486	667.349	2	0.000283115	GRLSKEDIERM	FALSE	11	P11142	NA_NA_NA_NA_NA_NA_NA_NA_NA_NA_NA_NA_NA	0.008
1487	714.856	2	-0.00387188	SRFYDDAIVSQK	FALSE	12	O75643	NA_NA_NA_NA_NA_NA_NA_NA_NA_NA_NA_NA_NA_NA	0.008
1488	434.266	3	-0.00120527	ARVPGPPARLGLP	FALSE	13	O75326	NA_NA_NA_NA_NA_NA_NA_NA_NA_NA_NA_NA_NA_NA_NA	0.008
1489	569.305	2	-0.00144688	IRLPSQYNF	FALSE	9	Q8TEM1	NA_NA_NA_NA_NA_NA_NA_NA_NA_NA_NA	0.008
1490	435.564	3	0.000801408	GRYHFVPGTTAV	FALSE	12	P40306	NA_NA_NA_NA_NA_NA_NA_NA_NA_NA_NA_NA_NA_NA	0.008
1491	469.257	3	-0.00108659	ARISKQWAEIGF	FALSE	12	Q8IZ81	NA_NA_NA_NA_NA_NA_NA_NA_NA_NA_NA_NA_NA_NA	0.0079
1492	531.302	2	-0.00197288	IRVPTVVDY	FALSE	9	P41002	NA_NA_NA_NA_NA_NA_NA_NA_NA_NA_NA	0.0079
1493	521.791	2	-0.00250738	GRLAWAQQL	FALSE	9	Q86X10	NA_NA_NA_NA_NA_NA_NA_NA_NA_NA_NA	0.0079
1494	610.823	2	-0.00358988	GRMGSQVIIPY	FALSE	11	Q16795	NA_NA_NA_NA_NA_NA_NA_NA_NA_NA_NA_NA_NA	0.0079
1495	420.204	3	0.000118401	HRFYGKNSSY	FALSE	10	Q13283	NA_NA_NA_NA_NA_NA_NA_NA_NA_NA_NA_NA	0.0079
1496	560.821	2	-0.000829381	NRLDLLITY	FALSE	9	Q14790	NA_NA_NA_NA_NA_NA_NA_NA_NA_NA_NA	0.0079
1497	398.873	3	5.67401e-05	VRFSPDGNRF	FALSE	10	O75083	NA_NA_NA_NA_NA_NA_NA_NA_NA_NA_NA_NA	0.0079
1499	400.228	3	-0.000638601	KRHNVFGLDL	FALSE	10	Q13206	NA_NA_NA_NA_NA_NA_NA_NA_NA_NA_NA_NA	0.0079
1500	503.305	2	0.00215862	LGAATLLLSF	FALSE	10	Q15485	NA_NA_NA_NA_NA_NA_NA_NA_NA_NA_NA_NA	0.0079
1501	599.299	2	-0.000318378	SRWEEYISK	FALSE	9	O60306	NA_NA_NA_NA_NA_NA_NA_NA_NA_NA_NA	0.0079
1502	507.783	2	-0.000104879	ARQDVEALL	FALSE	9	O43736	NA_NA_NA_NA_NA_NA_NA_NA_NA_NA_NA	0.0079
1503	636.801	2	-0.00515338	ERMKSPFGSSF	FALSE	11	Q9Y4B6	NA_NA_NA_NA_NA_NA_NA_NA_NA_NA_NA_NA_NA	0.0079
1505	591.3	2	-0.00186138	TRWDYLTQV	FALSE	9	Q9HB71	NA_NA_NA_NA_NA_NA_NA_NA_NA_NA_NA	0.0079
1506	411.907	3	-0.0014176	YRFIKKLEH	FALSE	9	O60331	NA_NA_NA_NA_NA_NA_NA_NA_NA_NA_NA	0.0079
1507	543.275	2	0.00219612	SRYTGINQF	FALSE	9	O75417	NA_NA_NA_NA_NA_NA_NA_NA_NA_NA_NA	0.0079
1508	617.343	2	0.00147812	GRLGQLAAPFGF	FALSE	12	Q86XR2	NA_NA_NA_NA_NA_NA_NA_NA_NA_NA_NA_NA_NA_NA	0.0079
1509	432.248	2	0.000165124	LSIPTYGL	FALSE	8	P49327	NA_NA_NA_NA_NA_NA_NA_NA_NA_NA	0.0079
1510	429.246	3	-0.000357929	GRLSLDDLLQR	FALSE	11	P27708	NA_NA_NA_NA_NA_NA_NA_NA_NA_NA_NA_NA_NA	0.0079
1511	362.565	3	4.93987e-05	IRTITVVQR	FALSE	9	Q9NW64	NA_NA_NA_NA_NA_NA_NA_NA_NA_NA_NA	0.0079
1512	378.221	3	-0.000172597	VRYPDRITL	FALSE	9	P60510	NA_NA_NA_NA_NA_NA_NA_NA_NA_NA_NA	0.0079
1513	509.602	3	-0.00232193	KRFTDEESRVFL	FALSE	12	Q9NYF8	NA_NA_NA_NA_NA_NA_NA_NA_NA_NA_NA_NA_NA_NA	0.0079
1514	529.311	3	-0.000561594	ARWLGTLDKKLER	FALSE	13	Q9UFH2	NA_NA_NA_NA_NA_NA_NA_NA_NA_NA_NA_NA_NA_NA_NA	0.0079
1515	459.939	3	0.000223405	SRFLPKPLYTR	FALSE	11	Q03013	NA_NA_NA_NA_NA_NA_NA_NA_NA_NA_NA_NA_NA	0.0079
1516	561.325	2	-0.00047138	HRQEIQVVL	FALSE	9	Q9NNX1	NA_NA_NA_NA_NA_NA_NA_NA_NA_NA_NA	0.0079
1517	525.282	2	-0.00357988	IRSDAILDF	FALSE	9	Q6P4Q7	NA_NA_NA_NA_NA_NA_NA_NA_NA_NA_NA	0.0079
1519	436.593	3	-0.00095326	ARIAFVKKPFM	FALSE	11	Q92543	NA_NA_NA_NA_NA_NA_NA_NA_NA_NA_NA_NA_NA	0.0081
1520	514.287	2	-0.00185738	GRHGVFLEL	FALSE	9	Q13200	NA_NA_NA_NA_NA_NA_NA_NA_NA_NA_NA	0.0081
1521	782.384	2	-0.00169938	KRFYLNNSVMEY	FALSE	12	P51946	NA_NA_NA_NA_NA_NA_NA_NA_NA_NA_NA_NA_NA_NA	0.0081
1522	416.906	3	-0.00146526	KRIEPADAHVL	FALSE	11	Q9GZZ1	NA_NA_NA_NA_NA_NA_NA_NA_NA_NA_NA_NA_NA	0.0081
1524	740.397	2	-0.00480638	GRFDVSFPNSIIK	FALSE	13	Q96T58	NA_NA_NA_NA_NA_NA_NA_NA_NA_NA_NA_NA_NA_NA_NA	0.0083
1526	458.245	3	-0.00176993	RRLDPIITEEM	FALSE	11	Q9Y2L5	NA_NA_NA_NA_NA_NA_NA_NA_NA_NA_NA_NA_NA	0.0083
1527	589.794	2	-0.00221188	SRFQTYITY	FALSE	9	Q8N8Q8	NA_NA_NA_NA_NA_NA_NA_NA_NA_NA_NA	0.0083
1528	546.799	2	0.00129962	ARMLLNDFL	FALSE	9	Q01581	NA_NA_NA_NA_NA_NA_NA_NA_NA_NA_NA	0.0083
1530	502.269	2	-0.00166488	SRFPQGAQL	FALSE	9	Q9NX02	NA_NA_NA_NA_NA_NA_NA_NA_NA_NA_NA	0.0083
1532	501.291	2	0.00541962	KGAVSAEQVI	FALSE	10	Q9UHV9	NA_NA_NA_NA_NA_NA_NA_NA_NA_NA_NA_NA	0.0083
1533	521.779	2	-0.00106188	QRATIDPEL	FALSE	9	Q9UL63	NA_NA_NA_NA_NA_NA_NA_NA_NA_NA_NA	0.0083
1535	421.899	3	-0.000710934	ARWQVAKELY	FALSE	10	Q9H8V3	NA_NA_NA_NA_NA_NA_NA_NA_NA_NA_NA_NA	0.0083
1536	497.77	2	0.000203122	GRLLSTANY	FALSE	9	O00469	NA_NA_NA_NA_NA_NA_NA_NA_NA_NA_NA	0.0083
1538	507.772	2	-0.000540383	QRANYVPAL	FALSE	9	Q8WYP5	pyrGlu_NA_NA_NA_NA_NA_NA_NA_NA_NA_NA	0.0083
1539	521.312	2	-0.000563382	RLLAEGINR	FALSE	9	O95985	NA_NA_NA_NA_NA_NA_NA_NA_NA_NA_NA	0.0083
1540	394.887	3	0.000486733	GRKLFYVHY	FALSE	9	Q92993	NA_NA_NA_NA_NA_NA_NA_NA_NA_NA_NA	0.0083
1541	359.871	3	0.000325734	SRFPHLLAH	FALSE	9	O75460	NA_NA_NA_NA_NA_NA_NA_NA_NA_NA_NA	0.0083
1542	550.8	2	0.00114212	ARNLIYFGF	FALSE	9	Q14643	NA_NA_NA_NA_NA_NA_NA_NA_NA_NA_NA	0.0083
1543	582.294	2	-0.00257938	SRYPDQWIV	FALSE	9	Q9NZJ9	NA_NA_NA_NA_NA_NA_NA_NA_NA_NA_NA	0.0083
1544	572.345	2	-0.00341438	FRNIPGITLL	FALSE	10	P36578	NA_NA_NA_NA_NA_NA_NA_NA_NA_NA_NA_NA	0.0083
1545	736.828	2	0.00147112	ERYDPATNSWAY	FALSE	12	Q53GT1	NA_NA_NA_NA_NA_NA_NA_NA_NA_NA_NA_NA_NA_NA	0.0083
1546	481.282	3	-0.000743266	TRFKPTRIIFY	FALSE	11	Q9H9G7	NA_NA_NA_NA_NA_NA_NA_NA_NA_NA_NA_NA_NA	0.0083
1547	404.249	3	0.000348403	KRVYLGALKY	FALSE	10	Q6P2Q9	NA_NA_NA_NA_NA_NA_NA_NA_NA_NA_NA_NA	0.0083
1548	433.592	3	-0.000700598	RRILLAEVPTM	FALSE	11	O15160	NA_NA_NA_NA_NA_NA_NA_NA_NA_NA_NA_NA_NA	0.0082
1549	414.915	3	0.000279072	VRIRAPIMRM	FALSE	10	Q8TEM1	NA_NA_NA_NA_NA_NA_NA_NA_NA_NA_NA_NA	0.0082
1550	680.826	2	-0.00458338	ARYLVNEGFEY	FALSE	11	P54198	NA_NA_NA_NA_NA_NA_NA_NA_NA_NA_NA_NA_NA	0.0082
1552	499.597	3	-0.00137993	GRLTLDKALDMTY	FALSE	13	Q6P179	NA_NA_NA_NA_NA_NA_NA_NA_NA_NA_NA_NA_NA_NA_NA	0.0084
1553	377.536	3	0.000714072	RRGDFIHVM	FALSE	9	P62993	NA_NA_NA_NA_NA_NA_NA_NA_NA_NA_NA	0.0084
1554	587.839	2	-0.000145377	GRVSGLVPSRF	FALSE	11	Q6UX40	NA_NA_NA_NA_NA_NA_NA_NA_NA_NA_NA_NA_NA	0.0084
1555	582.793	2	-0.00100438	GRWDQQYVI	FALSE	9	Q9NVI1	NA_NA_NA_NA_NA_NA_NA_NA_NA_NA_NA	0.0084
1556	559.342	2	-0.00380638	ARLNYLLRV	FALSE	9	P13807	NA_NA_NA_NA_NA_NA_NA_NA_NA_NA_NA	0.0084
1557	666.374	2	-0.00347738	MRLELDALRSK	FALSE	11	O60675	NA_NA_NA_NA_NA_NA_NA_NA_NA_NA_NA_NA_NA	0.0084
1558	561.3	2	-0.00146138	HRIEEVPEL	FALSE	9	P36578	NA_NA_NA_NA_NA_NA_NA_NA_NA_NA_NA	0.0084
1559	576.824	2	-0.000872884	GRLVIPAYTY	FALSE	10	Q9UQ49	NA_NA_NA_NA_NA_NA_NA_NA_NA_NA_NA_NA	0.0084
1560	539.799	2	4.56181e-05	ARNEYLLSL	FALSE	9	P98171	NA_NA_NA_NA_NA_NA_NA_NA_NA_NA_NA	0.0084
1561	530.947	3	-0.00213059	ARYGKSPYLYPLY	FALSE	13	P31150	NA_NA_NA_NA_NA_NA_NA_NA_NA_NA_NA_NA_NA_NA_NA	0.0084
1562	511.273	2	-0.00214638	FQNSVIASR	FALSE	9	Q9UPZ3	NA_NA_NA_NA_NA_NA_NA_NA_NA_NA_NA	0.0084
1563	572.315	2	0.00257062	GRLLWEQEL	FALSE	9	P42768	NA_NA_NA_NA_NA_NA_NA_NA_NA_NA_NA	0.0084
1564	520.759	2	-0.000209881	MRLGPGWSH	FALSE	9	Q9BRJ7	NA_NA_NA_NA_NA_NA_NA_NA_NA_NA_NA	0.0084
1565	559.812	2	0.00341212	PSSQDILVFL	FALSE	10	Q9H6R0	NA_NA_NA_NA_NA_NA_NA_NA_NA_NA_NA_NA	0.0084
1566	576.289	2	-0.00223138	GRFHGGNLFF	FALSE	10	P55789	NA_NA_NA_NA_NA_NA_NA_NA_NA_NA_NA_NA	0.0084
1567	563.83	2	-0.00272938	ARLQLQGLDL	FALSE	10	P49454	NA_NA_NA_NA_NA_NA_NA_NA_NA_NA_NA_NA	0.0084
1568	509.817	2	-0.00185888	ILDPHVVLL	FALSE	9	Q99567	NA_NA_NA_NA_NA_NA_NA_NA_NA_NA_NA	0.0084
1569	575.315	2	-0.00261088	KRFEELTNL	FALSE	9	B5ME19	NA_NA_NA_NA_NA_NA_NA_NA_NA_NA_NA	0.0084
1570	526.299	2	-0.00163338	VRTPVLFGY	FALSE	9	Q2MV58	NA_NA_NA_NA_NA_NA_NA_NA_NA_NA_NA	0.0084
1571	622.332	2	-0.00149688	YRVYQPVRY	FALSE	9	Q86TG7	NA_NA_NA_NA_NA_NA_NA_NA_NA_NA_NA	0.0085
1572	677.37	2	0.000321123	QRFPNALFVVY	FALSE	11	O60294	NA_NA_NA_NA_NA_NA_NA_NA_NA_NA_NA_NA_NA	0.009
1573	467.245	3	-0.000934927	SRFEGLEKISAY	FALSE	12	Q03013	NA_NA_NA_NA_NA_NA_NA_NA_NA_NA_NA_NA_NA_NA	0.009
1574	571.347	2	-0.00101788	FRHPVLIFI	FALSE	9	Q9H8H0	NA_NA_NA_NA_NA_NA_NA_NA_NA_NA_NA	0.009
1575	733.918	2	0.00228462	RRFSGLERSIVF	FALSE	12	Q7Z7L1	NA_NA_NA_NA_NA_NA_NA_NA_NA_NA_NA_NA_NA_NA	0.009
1576	604.325	2	-0.000667878	RRSDVEILGY	FALSE	10	Q86Y07	NA_NA_NA_NA_NA_NA_NA_NA_NA_NA_NA_NA	0.009
1577	350.209	3	-0.000884926	FRGDTVLLK	FALSE	9	P55072	NA_NA_NA_NA_NA_NA_NA_NA_NA_NA_NA	0.009
1578	520.299	2	0.000178125	QRLEGIVNK	FALSE	9	Q99460	pyrGlu_NA_NA_NA_NA_NA_NA_NA_NA_NA_NA	0.009
1579	523.292	2	-0.00183938	ARSPQFINL	FALSE	9	Q92576	NA_NA_NA_NA_NA_NA_NA_NA_NA_NA_NA	0.009
1580	509.216	2	0.00171112	FESFPEDF	FALSE	8	P78347	NA_NA_NA_NA_NA_NA_NA_NA_NA_NA	0.009
1581	401.905	3	-0.000695926	SRIWPLYLR	FALSE	9	Q9HCS7	NA_NA_NA_NA_NA_NA_NA_NA_NA_NA_NA	0.009
1582	628.802	2	-0.00309938	GRLDHGDWSTL	FALSE	11	Q96EX3	NA_NA_NA_NA_NA_NA_NA_NA_NA_NA_NA_NA_NA	0.009
1583	542.347	2	-0.000915378	QKAAKAGLLAL	FALSE	11	O14521	NA_NA_NA_NA_NA_NA_NA_NA_NA_NA_NA_NA_NA	0.009
1584	371.917	3	-0.000401265	KELTRLLKI	FALSE	9	Q96QK1	NA_NA_NA_NA_NA_NA_NA_NA_NA_NA_NA	0.009
1585	384.54	3	0.0016044	SRIMDRFNL	FALSE	9	O43143	NA_NA_NA_NA_NA_NA_NA_NA_NA_NA_NA	0.009
1586	399.916	3	0.000239404	ARLVEIAAKNL	FALSE	11	Q15067	NA_NA_NA_NA_NA_NA_NA_NA_NA_NA_NA_NA_NA	0.009
1587	366.877	3	0.000951072	GRFITVMKF	FALSE	9	Q14692	NA_NA_NA_NA_NA_NA_NA_NA_NA_NA_NA	0.009
1588	397.216	3	0.000652071	QRVQLMRQM	FALSE	9	Q2VIQ3	NA_NA_NA_NA_NA_NA_NA_NA_NA_NA_NA	0.009
1589	579.772	2	0.00157062	YRWASGAQGY	FALSE	10	P53370	NA_NA_NA_NA_NA_NA_NA_NA_NA_NA_NA_NA	0.009
1590	492.75	2	-0.000650885	ARGPVPEQM	FALSE	9	Q86SX3	NA_NA_NA_NA_NA_NA_NA_NA_NA_NA_NA	0.009
1591	431.272	3	0.000221072	RRYLPKLKAF	FALSE	10	Q49AN0	NA_NA_NA_NA_NA_NA_NA_NA_NA_NA_NA_NA	0.0089
1592	576.757	2	0.00110162	MNAPPAFESF	FALSE	10	P52435	Ac_NA_NA_NA_NA_NA_NA_NA_NA_NA_NA_NA	0.0089
1593	599.292	2	-0.00197138	QQLYWSHPR	FALSE	9	P62273	pyrGlu_NA_NA_NA_NA_NA_NA_NA_NA_NA_NA	0.0089
1594	415.57	3	0.00141607	KRFSVPVQHF	FALSE	10	Q99829	NA_NA_NA_NA_NA_NA_NA_NA_NA_NA_NA_NA	0.0089
1595	563.31	2	-0.00266388	SRYFGVLQR	FALSE	9	Q8IXM6	NA_NA_NA_NA_NA_NA_NA_NA_NA_NA_NA	0.0089
1596	393.216	3	0.000735071	ARIFKQHFM	FALSE	9	Q8IXI2	NA_NA_NA_NA_NA_NA_NA_NA_NA_NA_NA	0.0089
1597	441.582	3	-0.00193393	ARLPYLRTWF	FALSE	10	P53350	NA_NA_NA_NA_NA_NA_NA_NA_NA_NA_NA_NA	0.0089
1599	390.55	3	0.000422407	SRFVDGLTFK	FALSE	10	Q9HCE1	NA_NA_NA_NA_NA_NA_NA_NA_NA_NA_NA_NA	0.0088
1600	550.292	2	-0.00150438	IRTFITSDF	FALSE	9	P49915	NA_NA_NA_NA_NA_NA_NA_NA_NA_NA_NA	0.0088
1601	500.282	2	-0.00157238	GRVAQLEQV	FALSE	9	P62318	NA_NA_NA_NA_NA_NA_NA_NA_NA_NA_NA	0.0088
1602	573.837	2	-0.00256838	IRFGLLPLSM	FALSE	10	Q8WTW3	NA_NA_NA_NA_NA_NA_NA_NA_NA_NA_NA_NA	0.0088
1603	559.821	2	-0.00133288	ARWTYPVLL	FALSE	9	Q0PNE2	NA_NA_NA_NA_NA_NA_NA_NA_NA_NA_NA	0.0088
1604	502.286	2	-0.00723988	RLMLCALAL	FALSE	9	P26006	NA_NA_NA_NA_NA_NA_NA_NA_NA_NA_NA	0.0088
1605	563.304	2	0.00307012	NVVKLSDFGF	FALSE	10	M0R1R1	NA_NA_NA_NA_NA_NA_NA_NA_NA_NA_NA_NA	0.0088
1606	593.309	2	-0.00309488	YRLSLLEEY	FALSE	9	P53350	NA_NA_NA_NA_NA_NA_NA_NA_NA_NA_NA	0.0088
1607	552.822	2	-0.00247288	ARDQLIYLL	FALSE	9	Q9H267	NA_NA_NA_NA_NA_NA_NA_NA_NA_NA_NA	0.0088
1608	476.259	3	0.000102072	RQINKKGFWSY	FALSE	11	Q8NFQ8	NA_NA_NA_NA_NA_NA_NA_NA_NA_NA_NA_NA_NA	0.0088
1609	408.902	3	0.000437067	KRVFPKWTY	FALSE	9	Q2NL82	NA_NA_NA_NA_NA_NA_NA_NA_NA_NA_NA	0.0088
1611	524.303	2	-7.58775e-05	SRIWPLYL	FALSE	8	Q9HCS7	NA_NA_NA_NA_NA_NA_NA_NA_NA_NA	0.0088
1612	506.799	2	-0.00190088	ARILPAPQF	FALSE	9	Q9H6U6	NA_NA_NA_NA_NA_NA_NA_NA_NA_NA_NA	0.0088
1613	509.745	2	0.000388619	ERMVPAGMGA	FALSE	10	P52272	NA_NA_NA_NA_NA_NA_NA_NA_NA_NA_NA_NA	0.0088
1614	572.269	2	-0.00122688	ARDETEFYL	FALSE	9	P18077	NA_NA_NA_NA_NA_NA_NA_NA_NA_NA_NA	0.0088
1615	450.928	3	0.000199406	SRIWPLYLRF	FALSE	10	Q9HCS7	NA_NA_NA_NA_NA_NA_NA_NA_NA_NA_NA_NA	0.0088
1616	572.776	2	0.000946121	QREQVEKNM	FALSE	9	P23246	pyrGlu_NA_NA_NA_NA_NA_NA_NA_NA_NA_NA	0.0088
1617	414.241	2	0.000524121	GRAPGGLSL	FALSE	9	P17275	NA_NA_NA_NA_NA_NA_NA_NA_NA_NA_NA	0.0088
1618	438.211	3	0.00113207	MRFSYPDIHF	FALSE	10	Q9UKS7	NA_NA_NA_NA_NA_NA_NA_NA_NA_NA_NA_NA	0.0088
1619	456.305	2	-0.000718884	ALRALAAIL	FALSE	9	Q6P2H8	NA_NA_NA_NA_NA_NA_NA_NA_NA_NA_NA	0.0088
1620	516.284	2	-0.00171388	SRSHAIFTI	FALSE	9	Q2VIQ3	NA_NA_NA_NA_NA_NA_NA_NA_NA_NA_NA	0.0088
1622	443.279	2	-0.00651738	ARARVSLL	FALSE	8	Q9H2X0	NA_NA_NA_NA_NA_NA_NA_NA_NA_NA	0.0088
1623	572.316	2	0.00175962	ARLFIFETF	FALSE	9	P60228	NA_NA_NA_NA_NA_NA_NA_NA_NA_NA_NA	0.0088
1624	553.816	2	-0.00412138	SRFKQVQTL	FALSE	9	A2RU30	NA_NA_NA_NA_NA_NA_NA_NA_NA_NA_NA	0.0088
1625	606.33	2	0.00496312	LRFSAQDLVY	FALSE	10	Q9NVR5	NA_NA_NA_NA_NA_NA_NA_NA_NA_NA_NA_NA	0.0088
1626	366.856	3	-0.000336601	MRFDGRLGF	FALSE	9	Q96DE0	NA_NA_NA_NA_NA_NA_NA_NA_NA_NA_NA	0.0088
1627	532.309	2	-0.00398338	KKMGSALLSL	FALSE	10	Q6IPM2	NA_NA_NA_MetOX_NA_NA_NA_NA_NA_NA_NA_NA	0.0088
1628	606.857	2	0.00588162	TLRPSDILQGL	FALSE	11	O75808	NA_NA_NA_NA_NA_NA_NA_NA_NA_NA_NA_NA_NA	0.0088
1629	429,2311_	3	-0.000971602	HRFPFSRPEL	FALSE	10	Q8WTV1	NA_NA_NA_NA_NA_NA_NA_NA_NA_NA_NA_NA	0.0088
1630	439.913	3	0.000155066	RRLVPGCDVRF	FALSE	11	P52789	NA_NA_NA_NA_NA_NA_NA_NA_NA_NA_NA_NA_NA	0.0088
1632	516.617	3	-8.59262e-05	ARMKIDPEAFITR	FALSE	13	Q92616	NA_NA_NA_NA_NA_NA_NA_NA_NA_NA_NA_NA_NA_NA_NA	0.0088
1633	369.882	3	-0.000179931	ARKFPDVKF	FALSE	9	Q9H2J4	NA_NA_NA_NA_NA_NA_NA_NA_NA_NA_NA	0.0088
1634	492.938	3	5.20714e-05	IRFPDTVKQMNK	FALSE	12	Q5JPE7	NA_NA_NA_NA_NA_NA_NA_NA_NA_NA_NA_NA_NA_NA	0.0088
1636	379.22	3	-0.000660933	FRIEQKTTL	FALSE	9	Q9UBT6	NA_NA_NA_NA_NA_NA_NA_NA_NA_NA_NA	0.0091
1637	557.832	2	-0.00343988	IRFLINPEL	FALSE	9	Q86W56	NA_NA_NA_NA_NA_NA_NA_NA_NA_NA_NA	0.009
1638	520.745	2	-0.000764881	ARFEGSLNM	FALSE	9	Q9UJT0	NA_NA_NA_NA_NA_NA_NA_NA_NA_MetOX_NA	0.009
1639	553.287	2	-0.00102238	TRLGFFTTY	FALSE	9	Q5JTH9	NA_NA_NA_NA_NA_NA_NA_NA_NA_NA_NA	0.009
1640	539.306	2	-0.000846376	SRDFLVVNK	FALSE	9	Q9UJJ7	NA_NA_NA_NA_NA_NA_NA_NA_NA_NA_NA	0.009
1641	610.822	2	-0.00370338	SRFHLTPLSY	FALSE	10	Q15393	NA_NA_NA_NA_NA_NA_NA_NA_NA_NA_NA_NA	0.009
1642	481.301	2	-0.000267884	GRHPIGVLL	FALSE	9	Q9Y316	NA_NA_NA_NA_NA_NA_NA_NA_NA_NA_NA	0.009
1643	538.793	2	0.00150112	GRWFGGRQI	FALSE	9	O43719	NA_NA_NA_NA_NA_NA_NA_NA_NA_NA_NA	0.009
1644	358.536	3	-0.000515265	ARSVFLHLM	FALSE	9	O43156	NA_NA_NA_NA_NA_NA_NA_NA_NA_NA_NA	0.009
1645	503.28	2	0.00248062	TVTTTVTSPV	FALSE	10	Q6UXD5	NA_NA_NA_NA_NA_NA_NA_NA_NA_NA_NA_NA	0.009
1646	528.645	3	-0.0017216	KRIQQLTEEIGRL	FALSE	13	P12270	NA_NA_NA_NA_NA_NA_NA_NA_NA_NA_NA_NA_NA_NA_NA	0.009
1648	565.832	2	-0.000997382	ERFEIPIKV	FALSE	9	O60488	NA_NA_NA_NA_NA_NA_NA_NA_NA_NA_NA	0.009
1649	529.739	2	-0.00118338	FRYGGEAQM	FALSE	9	O75694	NA_NA_NA_NA_NA_NA_NA_NA_NA_NA_NA	0.009
1650	572.785	2	-0.000878881	KRFDMAVMF	FALSE	9	Q9H6T3	NA_NA_NA_NA_NA_NA_NA_NA_NA_NA_NA	0.009
1651	575.353	2	-0.000596882	KRLGTLVVTY	FALSE	10	Q96PP9	NA_NA_NA_NA_NA_NA_NA_NA_NA_NA_NA_NA	0.009
1652	542.826	2	-0.00154688	QRQQLLVSL	FALSE	9	Q9UJX6	NA_NA_NA_NA_NA_NA_NA_NA_NA_NA_NA	0.009
1653	709.899	2	-0.00478238	SRLGIPDAVSYIK	FALSE	13	O94874	NA_NA_NA_NA_NA_NA_NA_NA_NA_NA_NA_NA_NA_NA_NA	0.009
1654	471.948	3	0.000739073	VRFKYPKLISY	FALSE	11	P07099	NA_NA_NA_NA_NA_NA_NA_NA_NA_NA_NA_NA_NA	0.0094
1655	485.292	3	0.000310067	QRNELNAKVRLL	FALSE	12	P62195	NA_NA_NA_NA_NA_NA_NA_NA_NA_NA_NA_NA_NA_NA	0.0094
1656	732.419	2	-0.00374238	KRLNQVIFPVSY	FALSE	12	Q9GZZ1	NA_NA_NA_NA_NA_NA_NA_NA_NA_NA_NA_NA_NA_NA	0.0094
1657	506.835	2	-0.000374375	LRSGVIVRL	FALSE	9	Q92621	NA_NA_NA_NA_NA_NA_NA_NA_NA_NA_NA	0.0094
1658	406.541	3	0.000606068	GRFNGQFKTY	FALSE	10	P63220	NA_NA_NA_NA_NA_NA_NA_NA_NA_NA_NA_NA	0.0093
1659	551.76	2	-0.000649379	SYMEVPTYL	FALSE	9	Q13571	NA_NA_NA_NA_NA_NA_NA_NA_NA_NA_NA	0.0093
1660	574.303	2	-0.00163838	KRWGPNYNL	FALSE	9	Q8NG31	NA_NA_NA_NA_NA_NA_NA_NA_NA_NA_NA	0.0093
1661	585.869	2	-0.000645379	ARALLSAVTRL	FALSE	11	P26232	NA_NA_NA_NA_NA_NA_NA_NA_NA_NA_NA_NA_NA	0.0093
1662	674.362	2	-0.00187038	SRFQAEIPLMR	FALSE	11	Q6PJG2	NA_NA_NA_NA_NA_NA_NA_NA_NA_NA_NA_NA_NA	0.0093
1663	619.836	2	-0.00198788	SRFKDRIVSM	FALSE	10	Q8N3U4	NA_NA_NA_NA_NA_NA_NA_NA_NA_NA_NA_NA	0.0093
1664	526.313	2	-0.00421438	RLHSIEAIL	FALSE	9	Q9Y2V3	NA_NA_NA_NA_NA_NA_NA_NA_NA_NA_NA	0.0093
1665	532.309	2	0.00173362	ITMKELISL	FALSE	9	Q6YHU6	NA_NA_NA_MetOX_NA_NA_NA_NA_NA_NA_NA	0.0093
1666	438.918	3	0.000124404	RRWEQSLRAL	FALSE	10	Q9Y3A0	NA_NA_NA_NA_NA_NA_NA_NA_NA_NA_NA_NA	0.0093
1667	660.365	2	-0.00537538	QRVSTLQDLLF	FALSE	11	Q13363	NA_NA_NA_NA_NA_NA_NA_NA_NA_NA_NA_NA_NA	0.0093
1668	491.255	3	-0.00118893	GRHSLYKMLGYF	FALSE	12	Q9Y262	NA_NA_NA_NA_NA_NA_NA_NA_NA_NA_NA_NA_NA_NA	0.0093
1669	493.246	3	0.00148307	GRNNILTDHFQY	FALSE	12	Q96K37	NA_NA_NA_NA_NA_NA_NA_NA_NA_NA_NA_NA_NA_NA	0.0093
1670	545.324	2	0.00487662	QAFLSVQALL	FALSE	10	O60449	NA_NA_NA_NA_NA_NA_NA_NA_NA_NA_NA_NA	0.0093
1671	482.267	2	0.000209618	ARVPSSLAY	FALSE	9	Q9NQS7	NA_NA_NA_NA_NA_NA_NA_NA_NA_NA_NA	0.0093
1672	534.784	2	-0.00132438	NRHAVVMEL	FALSE	9	Q9BVS4	NA_NA_NA_NA_NA_NA_NA_NA_NA_NA_NA	0.0093
1673	686.319	2	-0.00306788	SRFAQENELMF	FALSE	11	P20338	NA_NA_NA_NA_NA_NA_NA_NA_NA_NA_NA_NA_NA	0.0093
1674	648.871	2	0.000988618	KRFEIIKEAY	FALSE	10	P14735	NA_NA_NA_NA_NA_NA_NA_NA_NA_NA_NA_NA	0.0093
1675	441.282	2	-0.000543882	ARALLGPAL	FALSE	9	P35250	NA_NA_NA_NA_NA_NA_NA_NA_NA_NA_NA	0.0093
1676	604.842	2	-0.00109688	ARWLPEPGLGL	FALSE	11	Q9C0C7	NA_NA_NA_NA_NA_NA_NA_NA_NA_NA_NA_NA_NA	0.0093
1677	514.335	2	-0.00251888	ARLVFVPLL	FALSE	9	Q99808	NA_NA_NA_NA_NA_NA_NA_NA_NA_NA_NA	0.0095
1678	476.627	3	0.000166741	YRLPLRVVKHF	FALSE	11	O00626	NA_NA_NA_NA_NA_NA_NA_NA_NA_NA_NA_NA_NA	0.0095
1679	598.316	2	0.00109662	HRIPTQPPSY	FALSE	10	Q9BQQ3	NA_NA_NA_NA_NA_NA_NA_NA_NA_NA_NA_NA	0.0095
1680	575.81	2	0.000681123	ARLSDLLTDF	FALSE	10	Q8NB14	NA_NA_NA_NA_NA_NA_NA_NA_NA_NA_NA_NA	0.0095
1681	522.312	2	-0.00307188	QRLLVQTSV	FALSE	9	P22670	NA_NA_NA_NA_NA_NA_NA_NA_NA_NA_NA	0.0095
1682	543.817	2	-0.00017838	TRLQQITNI	FALSE	9	Q9NVX0	NA_NA_NA_NA_NA_NA_NA_NA_NA_NA_NA	0.0095
1683	574.825	2	-0.00191538	YRIPLNPYL	FALSE	9	Q8IY67-2	NA_NA_NA_NA_NA_NA_NA_NA_NA_NA_NA	0.0095
1684	489.292	2	-0.00140788	GRLLVATTF	FALSE	9	P41252	NA_NA_NA_NA_NA_NA_NA_NA_NA_NA_NA	0.0095
1685	465.294	2	0.000492117	GRTGTIIVI	FALSE	9	P29350	NA_NA_NA_NA_NA_NA_NA_NA_NA_NA_NA	0.0095
1686	604.295	2	-0.00221038	RRWDDDVVF	FALSE	9	Q9P013	NA_NA_NA_NA_NA_NA_NA_NA_NA_NA_NA	0.0095
1687	578.305	2	-0.00406688	GRNVYRMLF	FALSE	9	Q13123	NA_NA_NA_NA_NA_NA_NA_NA_NA_NA_NA	0.0095
1688	556.781	2	0.000860617	ARHELQVEM	FALSE	9	O60610	NA_NA_NA_NA_NA_NA_NA_NA_NA_NA_NA	0.0095
1689	551.82	2	-0.00276438	LRAQFLQNL	FALSE	9	O94927	NA_NA_NA_NA_NA_NA_NA_NA_NA_NA_NA	0.0095
1690	490.253	2	0.00082862	SRNAQSLGF	FALSE	9	O60879	NA_NA_NA_NA_NA_NA_NA_NA_NA_NA_NA	0.0095
1691	491.749	2	-0.000584881	TAMDVVYAL	FALSE	9	P62805	NA_NA_NA_NA_NA_NA_NA_NA_NA_NA_NA	0.0095
1692	447.243	2	-0.00153838	AVAMLFLE	FALSE	8	Q7LGA3	NA_NA_NA_NA_NA_NA_NA_NA_NA_NA	0.0095
1693	420.225	3	0.000723408	MRIPVDPSTSR	FALSE	11	Q13761	NA_NA_NA_NA_NA_NA_NA_NA_NA_NA_NA_NA_NA	0.0095
1694	605.826	2	-0.00131238	GRTYPVEILY	FALSE	10	Q14562	NA_NA_NA_NA_NA_NA_NA_NA_NA_NA_NA_NA	0.0095
1695	382.233	3	0.000198734	GRFGPLASVKI	FALSE	11	O15042	NA_NA_NA_NA_NA_NA_NA_NA_NA_NA_NA_NA_NA	0.0095
1696	425.915	3	-4.26004e-05	ARFEQLISRR	FALSE	10	Q9HCS7	NA_NA_NA_NA_NA_NA_NA_NA_NA_NA_NA_NA	0.0095
1697	584.304	2	-0.000735876	RQIPYTMMK	FALSE	9	Q00325	NA_NA_NA_NA_NA_NA_NA_NA_NA_NA_NA	0.0101
1698	422.553	3	-0.000105258	ARLQQMSERF	FALSE	10	Q9BQD3	NA_NA_NA_NA_NA_NA_NA_NA_NA_NA_NA_NA	0.0101
1699	449.582	3	-0.00129326	QRWAGPLPATHL	FALSE	12	Q9UIF7	NA_NA_NA_NA_NA_NA_NA_NA_NA_NA_NA_NA_NA_NA	0.0101
1700	406.562	3	0.000293737	YRIKFKESF	FALSE	9	P13073	NA_NA_NA_NA_NA_NA_NA_NA_NA_NA_NA	0.0101
1701	419.594	3	-0.000598599	ARLSKEALKQL	FALSE	11	Q9HAW4	NA_NA_NA_NA_NA_NA_NA_NA_NA_NA_NA_NA_NA	0.0104
1702	559.285	2	-0.00272288	IRYFVSEGF	FALSE	9	P17174	NA_NA_NA_NA_NA_NA_NA_NA_NA_NA_NA	0.0104
1703	532.304	2	-0.000837877	SRLPHNNLL	FALSE	9	Q96N11	NA_NA_NA_NA_NA_NA_NA_NA_NA_NA_NA	0.0104
1704	587.786	2	0.00771812	EVEGVGEVEEV	FALSE	11	Q5BKZ1	NA_NA_NA_NA_NA_NA_NA_NA_NA_NA_NA_NA_NA	0.0104
1705	486.294	2	-0.00640238	PAPVPALPLP	FALSE	10	Q8N4B1	NA_NA_NA_NA_NA_NA_NA_NA_NA_NA_NA_NA	0.0104
1706	370.567	3	0.000308401	ARFKFLSKL	FALSE	9	Q9Y2G3	NA_NA_NA_NA_NA_NA_NA_NA_NA_NA_NA	0.0104
1707	377.903	3	-0.00269593	GRIGNFIVKK	FALSE	10	Q00796	NA_NA_NA_NA_NA_NA_NA_NA_NA_NA_NA_NA	0.0104
1708	527.773	2	0.00141712	SRLSVMAQY	FALSE	9	Q8WVM0	NA_NA_NA_NA_NA_NA_NA_NA_NA_NA_NA	0.0104
1709	456.286	2	-0.00172588	GRLPVGLSL	FALSE	9	P52333	NA_NA_NA_NA_NA_NA_NA_NA_NA_NA_NA	0.0104
1710	639.814	2	-0.00166688	HRFDPKASSSF	FALSE	11	O96009	NA_NA_NA_NA_NA_NA_NA_NA_NA_NA_NA_NA_NA	0.0104
1711	614.313	2	0.00127062	ARWSDGLFYL	FALSE	10	Q9Y483	NA_NA_NA_NA_NA_NA_NA_NA_NA_NA_NA_NA	0.0104
1712	485.899	3	-0.000676261	IRFQSRSGDAMGM	FALSE	13	P04035	NA_NA_NA_NA_NA_NA_NA_NA_NA_NA_NA_NA_NA_NA_NA	0.0104
1713	364.533	3	0.000106071	MRHLGAFLF	FALSE	9	P20062	NA_NA_NA_NA_NA_NA_NA_NA_NA_NA_NA	0.0104
1714	600.33	2	-0.000952882	SRTPYHVNLL	FALSE	10	P49721	NA_NA_NA_NA_NA_NA_NA_NA_NA_NA_NA_NA	0.0104
1715	429.604	3	0.000994406	ARHGLPLLPLLS	FALSE	12	Q8NBJ7	NA_NA_NA_NA_NA_NA_NA_NA_NA_NA_NA_NA_NA_NA	0.0104
1716	388.557	3	0.0006564	GRFDSSIIRI	FALSE	10	Q9C0G0	NA_NA_NA_NA_NA_NA_NA_NA_NA_NA_NA_NA	0.0104
1718	427.565	3	0.00100107	YRLGQDPYRL	FALSE	10	P18583	NA_NA_NA_NA_NA_NA_NA_NA_NA_NA_NA_NA	0.0106
1719	495.788	2	-0.00233288	ARLGGAVLSF	FALSE	10	P27708	NA_NA_NA_NA_NA_NA_NA_NA_NA_NA_NA_NA	0.0106
1720	499.808	2	-0.00135688	ARDALIARL	FALSE	9	Q8NFZ5	NA_NA_NA_NA_NA_NA_NA_NA_NA_NA_NA	0.0107
1721	435.245	3	0.00196374	IRFLNAENAQK	FALSE	11	P43487	NA_NA_NA_NA_NA_NA_NA_NA_NA_NA_NA_NA_NA	0.0107
1722	452.291	3	0.000461068	ARFLPSPVVIKK	FALSE	12	Q13618	NA_NA_NA_NA_NA_NA_NA_NA_NA_NA_NA_NA_NA_NA	0.0107
1723	495.807	2	-0.00212538	SRIGKLLGF	FALSE	9	P38435	NA_NA_NA_NA_NA_NA_NA_NA_NA_NA_NA	0.0107
1724	606.33	2	-0.00326488	KRFWYIEGI	FALSE	9	Q92604	NA_NA_NA_NA_NA_NA_NA_NA_NA_NA_NA	0.0107
1725	460.936	3	0.00103307	GRIYIKHPHLF	FALSE	11	Q9H147	NA_NA_NA_NA_NA_NA_NA_NA_NA_NA_NA_NA_NA	0.0107
1726	523.588	3	0.00136874	RRWDDSQKYLSD	FALSE	12	Q16543	NA_NA_NA_NA_NA_NA_NA_NA_NA_NA_NA_NA_NA_NA	0.0107
1727	493.762	2	-0.00134938	FLPEAPAEL	FALSE	9	P49736	NA_NA_NA_NA_NA_NA_NA_NA_NA_NA_NA	0.0109
1729	556.305	2	-0.00619788	VRSDFLLVY	FALSE	9	Q13144	NA_NA_NA_NA_NA_NA_NA_NA_NA_NA_NA	0.011
1730	463.293	2	-0.00215088	ARAPATLLL	FALSE	9	P21589	NA_NA_NA_NA_NA_NA_NA_NA_NA_NA_NA	0.011
1731	546.777	2	-0.00270738	ARFSPSPLSM	FALSE	10	Q15118	NA_NA_NA_NA_NA_NA_NA_NA_NA_NA_NA_NA	0.011
1732	647.344	2	0.00360462	ARLQEIYNRM	FALSE	10	Q92974	NA_NA_NA_NA_NA_NA_NA_NA_NA_NA_NA_NA	0.011
1733	594.334	2	-0.00257038	SRAGLQFPVGR	FALSE	11	P16104	NA_NA_NA_NA_NA_NA_NA_NA_NA_NA_NA_NA_NA	0.011
1734	622.826	2	0.00029562	FRQYAKDIGF	FALSE	10	P62273	NA_NA_NA_NA_NA_NA_NA_NA_NA_NA_NA_NA	0.011
1735	554.826	2	0.00397062	IRTDTYVKL	FALSE	9	Q9H211	NA_NA_NA_NA_NA_NA_NA_NA_NA_NA_NA	0.011
1736	678.356	2	-0.00311088	GYLPNQLFRTF	FALSE	11	Q92499	NA_NA_NA_NA_NA_NA_NA_NA_NA_NA_NA_NA_NA	0.011
1737	366.245	3	-0.000829596	TRIPKIQKL	FALSE	9	P11142	NA_NA_NA_NA_NA_NA_NA_NA_NA_NA_NA	0.011
1738	518.774	2	-0.000779384	ARNGEYITL	FALSE	9	O15055	NA_NA_NA_NA_NA_NA_NA_NA_NA_NA_NA	0.011
1739	481.258	2	-0.00305088	GRSAVVEML	FALSE	9	Q13418	NA_NA_NA_NA_NA_NA_NA_NA_NA_NA_NA	0.011
1740	511.286	2	-0.00232238	ARLLSSFDL	FALSE	9	Q9BWH6	NA_NA_NA_NA_NA_NA_NA_NA_NA_NA_NA	0.011
1742	386.577	3	-0.000578925	TRWNKIVLK	FALSE	9	Q9BZL1	NA_NA_NA_NA_NA_NA_NA_NA_NA_NA_NA	0.011
1743	554.333	2	-0.00253888	RRLDPIPQL	FALSE	9	Q96BY9	NA_NA_NA_NA_NA_NA_NA_NA_NA_NA_NA	0.011
1744	385.216	3	0.000235075	KRYPGFMRV	FALSE	9	Q9BXP5	NA_NA_NA_NA_NA_NA_NA_NA_NA_NA_NA	0.011
1745	472.282	2	-0.00084038	GRSDVLVVV	FALSE	9	Q9UJY5	NA_NA_NA_NA_NA_NA_NA_NA_NA_NA_NA	0.011
1747	510.796	2	-0.000414383	SRVKFSPSL	FALSE	9	Q9Y2X0	NA_NA_NA_NA_NA_NA_NA_NA_NA_NA_NA	0.011
1748	479.772	2	0.00200362	ARSPTNSLL	FALSE	9	Q14106	NA_NA_NA_NA_NA_NA_NA_NA_NA_NA_NA	0.011
1749	462.598	3	9.14055e-05	IRWLEDEKALL	FALSE	11	O00139	NA_NA_NA_NA_NA_NA_NA_NA_NA_NA_NA_NA_NA	0.011
1750	571.819	2	0.000790624	RRDNNELLL	FALSE	9	P49736	NA_NA_NA_NA_NA_NA_NA_NA_NA_NA_NA	0.011
1751	696.336	2	-0.00330638	KRQEWAEPNSF	FALSE	11	Q96L91	NA_NA_NA_NA_NA_NA_NA_NA_NA_NA_NA_NA_NA	0.0116
1752	363.216	3	-0.00216226	GRLTKHTKF	FALSE	9	Q9Y3U8	NA_NA_NA_NA_NA_NA_NA_NA_NA_NA_NA	0.0116
1753	442.565	3	-0.0002336	HRMFDIVGTHL	FALSE	11	O75618	NA_NA_NA_NA_NA_NA_NA_NA_NA_NA_NA_NA_NA	0.0116
1754	455.911	3	-0.000398933	ARFKDELDIMK	FALSE	11	Q86SZ2	NA_NA_NA_NA_NA_NA_NA_NA_NA_NA_NA_NA_NA	0.0116
1755	576.292	2	0.000737621	LSWLDGSGLGF	FALSE	11	P54105	NA_NA_NA_NA_NA_NA_NA_NA_NA_NA_NA_NA_NA	0.0116
1756	434.94	3	0.00061207	VRFVTGNKILR	FALSE	11	P62277	NA_NA_NA_NA_NA_NA_NA_NA_NA_NA_NA_NA_NA	0.0116
1757	391.898	3	0.000387405	MRVTAPRTLL	FALSE	10	P03989;P30485	NA_MetOX_NA_NA_NA_NA_NA_NA_NA_NA_NA_NA	0.0116
1758	663.423	2	-0.00168838	RRLALFPGVALL	FALSE	12	P30101	NA_NA_NA_NA_NA_NA_NA_NA_NA_NA_NA_NA_NA_NA	0.0116
1759	471.264	2	-0.00153638	MRLPGGPTL	FALSE	9	Q9NQ55	NA_NA_NA_NA_NA_NA_NA_NA_NA_NA_NA	0.0115
1760	496.779	2	-0.00146488	LRYGGNLSL	FALSE	9	Q96JK2	NA_NA_NA_NA_NA_NA_NA_NA_NA_NA_NA	0.0114
1761	509.273	2	-0.00488888	NRFPAVNSL	FALSE	9	O95249	NA_NA_NA_NA_NA_NA_NA_NA_NA_NA_NA	0.0114
1762	475.255	3	-0.000165265	KRFVPSQHYVY	FALSE	11	P14598	NA_NA_NA_NA_NA_NA_NA_NA_NA_NA_NA_NA_NA	0.0114
1763	567.307	2	-0.00198988	RQFPTPFQL	FALSE	9	Q6N043	NA_NA_NA_NA_NA_NA_NA_NA_NA_NA_NA	0.0114
1764	545.305	2	-0.00194688	QRILSQPTF	FALSE	9	Q9XRX5	NA_NA_NA_NA_NA_NA_NA_NA_NA_NA_NA	0.0114
1765	502.268	2	-0.00186388	GRWSGTLNL	FALSE	9	Q9Y2Z4	NA_NA_NA_NA_NA_NA_NA_NA_NA_NA_NA	0.0114
1766	500.265	2	-0.00179038	ARTSYLAAF	FALSE	9	Q4ZIN3	NA_NA_NA_NA_NA_NA_NA_NA_NA_NA_NA	0.0114
1767	553.31	2	-0.000220379	SRLAIRNEF	FALSE	9	Q6NXE6	NA_NA_NA_NA_NA_NA_NA_NA_NA_NA_NA	0.0114
1768	591.337	2	-0.000647383	FRLKDGVLAY	FALSE	10	Q14690	NA_NA_NA_NA_NA_NA_NA_NA_NA_NA_NA_NA	0.0114
1769	620.843	2	-0.00112738	SRFTGSIFIGR	FALSE	11	Q8IZH2	NA_NA_NA_NA_NA_NA_NA_NA_NA_NA_NA_NA_NA	0.0114
1770	623.825	2	-0.000800384	HRISLEYSEL	FALSE	10	O75150	NA_NA_NA_NA_NA_NA_NA_NA_NA_NA_NA_NA	0.0114
1771	480.777	2	0.00298362	ELFTSLIGV	FALSE	9	O60721	pyrGlu_NA_NA_NA_NA_NA_NA_NA_NA_NA_NA	0.0114
1772	426.565	3	0.00179007	TRIHFPEALGH	FALSE	11	O00562	NA_NA_NA_NA_NA_NA_NA_NA_NA_NA_NA_NA_NA	0.0114
1773	646.323	2	-0.00395288	TRLINPENMGF	FALSE	11	Q9NZJ4	NA_NA_NA_NA_NA_NA_NA_NA_NA_NA_NA_NA_NA	0.0114
1774	598.825	2	-0.000203878	KRYNGGLLEF	FALSE	10	Q86Y13	NA_NA_NA_NA_NA_NA_NA_NA_NA_NA_NA_NA	0.0114
1775	520.269	2	-0.000764884	QRHDGAFLI	FALSE	9	P62993	pyrGlu_NA_NA_NA_NA_NA_NA_NA_NA_NA_NA	0.0114
1776	506.3	2	-0.00186438	TRQPLALNV	FALSE	9	Q12905	NA_NA_NA_NA_NA_NA_NA_NA_NA_NA_NA	0.0114
1777	495.286	2	0.000420616	ARSELLTTV	FALSE	9	Q12789	NA_NA_NA_NA_NA_NA_NA_NA_NA_NA_NA	0.0114
1778	552.334	2	0.00103562	KRFEIINAI	FALSE	9	P55209	NA_NA_NA_NA_NA_NA_NA_NA_NA_NA_NA	0.0114
1779	611.804	2	-0.00195738	HRMLAIYDGF	FALSE	10	Q01813	NA_NA_NA_NA_NA_NA_NA_NA_NA_NA_NA_NA	0.0114
1780	550.325	2	-0.00287888	SRNEALIALL	FALSE	10	Q14651	NA_NA_NA_NA_NA_NA_NA_NA_NA_NA_NA_NA	0.0114
1781	637.867	2	-0.000271877	FRFLPPAQVTV	FALSE	11	Q9H6R4	NA_NA_NA_NA_NA_NA_NA_NA_NA_NA_NA_NA_NA	0.0114
1782	462.25	2	-0.00123988	SRFSGGSLL	FALSE	9	O75161	NA_NA_NA_NA_NA_NA_NA_NA_NA_NA_NA	0.0114
1783	469.812	2	0.000632121	VNIPKVLR	FALSE	8	Q00610	NA_NA_NA_NA_NA_NA_NA_NA_NA_NA	0.0114
1784	476.267	2	-0.000590376	GRLPDPPSL	FALSE	9	Q53EQ6	NA_NA_NA_NA_NA_NA_NA_NA_NA_NA_NA	0.0114
1785	538.279	2	-0.00222938	GRATPVPGGTY	FALSE	11	Q9H7L2	NA_NA_NA_NA_NA_NA_NA_NA_NA_NA_NA_NA_NA	0.0114
1786	731.342	2	0.000253121	ARYGTGVFGQNEY	FALSE	13	Q9BWL3	NA_NA_NA_NA_NA_NA_NA_NA_NA_NA_NA_NA_NA_NA_NA	0.0114
1787	494.942	3	-0.00141026	SRLNITYPMLFK	FALSE	12	Q92890	NA_NA_NA_NA_NA_NA_NA_NA_NA_NA_NA_NA_NA_NA	0.0114
1788	434.254	3	-0.00241726	KRVLPPNWKY	FALSE	10	P62277	NA_NA_NA_NA_NA_NA_NA_NA_NA_NA_NA_NA	0.0114
1789	664.338	2	0.00226762	QRIDNFSVVSY	FALSE	11	Q5SWA1	NA_NA_NA_NA_NA_NA_NA_NA_NA_NA_NA_NA_NA	0.0114
1790	611.319	2	-0.000865882	QRTHVMRFF	FALSE	9	P56556	NA_NA_NA_NA_NA_NA_NA_NA_NA_NA_NA	0.0114
1791	400.908	3	-0.000505934	LRVDPVNFKL	FALSE	10	P69905	NA_NA_NA_NA_NA_NA_NA_NA_NA_NA_NA_NA	0.0114
1792	462.267	3	-0.000404595	SRFGKFIRINF	FALSE	11	P35579	NA_NA_NA_NA_NA_NA_NA_NA_NA_NA_NA_NA_NA	0.0114
1793	641.834	2	-0.00280038	KRIDIMVGMGY	FALSE	11	P27448	NA_NA_NA_NA_NA_NA_NA_NA_NA_NA_NA_NA_NA	0.0114
1794	626.821	2	-0.00483538	GRFSQLYPER	FALSE	10	P48449	NA_NA_NA_NA_NA_NA_NA_NA_NA_NA_NA_NA	0.0114
1795	631.845	2	-0.00146738	RRLPSDVVTGY	FALSE	11	Q6PI98	NA_NA_NA_NA_NA_NA_NA_NA_NA_NA_NA_NA_NA	0.0114
1796	519.291	2	-0.00230838	SRLPLAFAY	FALSE	9	O14578	NA_NA_NA_NA_NA_NA_NA_NA_NA_NA_NA	0.0115
1798	472.27	2	0.00535312	DNKINNLL	FALSE	8	P24588	NA_NA_NA_NA_NA_NA_NA_NA_NA_NA	0.0115
1799	561.312	2	0.000725115	IRMSFQNLL	FALSE	9	O14617	NA_NA_NA_NA_NA_NA_NA_NA_NA_NA_NA	0.0115
1800	506.796	2	0.00272712	IQAGVNGIQL	FALSE	10	A0FGR9	NA_NA_NA_NA_NA_NA_NA_NA_NA_NA_NA_NA	0.0115
1801	416.227	3	0.00384707	WRVGETETRL	FALSE	10	P61962	NA_NA_NA_NA_NA_NA_NA_NA_NA_NA_NA_NA	0.0115
1802	715.85	2	-0.00201538	YRFPEELTQTF	FALSE	11	P26641	NA_NA_NA_NA_NA_NA_NA_NA_NA_NA_NA_NA_NA	0.0115
1803	573.321	2	0.000846117	GRLSPIENFL	FALSE	10	Q8IVL5	NA_NA_NA_NA_NA_NA_NA_NA_NA_NA_NA_NA	0.0115
1804	486.298	2	-0.000490379	ARAIISELV	FALSE	9	P78344	NA_NA_NA_NA_NA_NA_NA_NA_NA_NA_NA	0.0115
1805	528.822	2	-0.00327238	GRAEVVSLLL	FALSE	10	Q8IWZ3	NA_NA_NA_NA_NA_NA_NA_NA_NA_NA_NA_NA	0.0115
1806	553.301	2	0.00191262	LEFREIGEL	FALSE	9	P01011	NA_NA_NA_NA_NA_NA_NA_NA_NA_NA_NA	0.0115
1808	379.245	2	-0.000595377	LATIAGLV	FALSE	8	Q8N357	NA_NA_NA_NA_NA_NA_NA_NA_NA_NA	0.0115
1809	643.884	2	0.000746616	ARYGVIIVGNPK	FALSE	12	Q92900	NA_NA_NA_NA_NA_NA_NA_NA_NA_NA_NA_NA_NA_NA	0.0115
1810	555.85	2	0.00686912	ELSAAALLPLL	FALSE	11	C9JJ37	NA_NA_NA_NA_NA_NA_NA_NA_NA_NA_NA_NA_NA	0.0115
1811	488.293	2	-0.00515888	ANLFILATL	FALSE	9	Q9UIC8-2	NA_NA_NA_NA_NA_NA_NA_NA_NA_NA_NA	0.0115
1812	524.798	2	-0.000888881	GRDTFIALR	FALSE	9	P35573	NA_NA_NA_NA_NA_NA_NA_NA_NA_NA_NA	0.0115
1814	535.295	2	-0.00263638	MRFLAATFL	FALSE	9	P61916	NA_NA_NA_NA_NA_NA_NA_NA_NA_NA_NA	0.0115
1815	611.324	2	-0.00407638	YRLGEDVVGTL	FALSE	11	Q92546	NA_NA_NA_NA_NA_NA_NA_NA_NA_NA_NA_NA_NA	0.0115
1816	554.773	2	-0.00702738	DNGDSYLVLI	FALSE	10	P26045	NA_NA_NA_NA_NA_NA_NA_NA_NA_NA_NA_NA	0.0115
1817	532.789	2	-0.00222938	ERNLLSVAY	FALSE	9	P31946;P62258	NA_NA_NA_NA_NA_NA_NA_NA_NA_NA_NA	0.0115
1818	645.846	2	-0.000636382	SRIYWDGPLAL	FALSE	11	Q15306	NA_NA_NA_NA_NA_NA_NA_NA_NA_NA_NA_NA_NA	0.0115
1819	510.776	2	-0.00162188	ARDSVVLNF	FALSE	9	P23786	NA_NA_NA_NA_NA_NA_NA_NA_NA_NA_NA	0.0115
1820	786.395	2	-0.00132138	ARLQWSSTELAYF	FALSE	13	Q9UFC0	NA_NA_NA_NA_NA_NA_NA_NA_NA_NA_NA_NA_NA_NA_NA	0.0117
1821	650.332	2	-0.00351238	MRFQNTVTRF	FALSE	10	C9J6S2	NA_NA_NA_NA_NA_NA_NA_NA_NA_NA_NA_NA	0.0117
1822	396.55	3	0.000199071	GRFKEPHAVF	FALSE	10	P05771	NA_NA_NA_NA_NA_NA_NA_NA_NA_NA_NA_NA	0.0117
1825	470.56	3	-0.000148259	HRGDFSYIGNLM	FALSE	12	Q9BPX3	NA_NA_NA_NA_NA_NA_NA_NA_NA_NA_NA_NA_NA_NA	0.0117
1826	470.588	3	-0.000149598	RRFDAMPFTLR	FALSE	11	Q9UQ80	NA_NA_NA_NA_NA_NA_NA_NA_NA_NA_NA_NA_NA	0.0117
1827	392.222	3	0.000804403	HRIVEAFRF	FALSE	9	P19440	NA_NA_NA_NA_NA_NA_NA_NA_NA_NA_NA	0.0117
1828	385.557	3	-0.000873595	ARVIIEKYY	FALSE	9	P08708	NA_NA_NA_NA_NA_NA_NA_NA_NA_NA_NA	0.0116
1829	465.923	3	-0.0001096	ARIGLAEEIRHM	FALSE	12	Q13085	NA_NA_NA_NA_NA_NA_NA_NA_NA_NA_NA_NA_NA_NA	0.0116
1830	683.85	2	-0.00274638	SRIEESIDRVY	FALSE	11	Q14566	NA_NA_NA_NA_NA_NA_NA_NA_NA_NA_NA_NA_NA	0.0116
1831	411.233	3	0.000310407	YRKFFETKL	FALSE	9	O15042	NA_NA_NA_NA_NA_NA_NA_NA_NA_NA_NA	0.0116
1832	651.398	2	0.00203812	VAPLAPLPIPSNL	FALSE	13	O15027	NA_NA_NA_NA_NA_NA_NA_NA_NA_NA_NA_NA_NA_NA_NA	0.0116
1833	395.89	3	0.000554069	KRWLPSHVY	FALSE	9	Q86YD1	NA_NA_NA_NA_NA_NA_NA_NA_NA_NA_NA	0.0116
1834	531.792	2	-0.00250388	KRIDIMVGM	FALSE	9	P27448	NA_NA_NA_NA_NA_NA_NA_NA_NA_NA_NA	0.0116
1835	387.574	3	0.000630733	FRHPHIIKL	FALSE	9	Q13131	NA_NA_NA_NA_NA_NA_NA_NA_NA_NA_NA	0.0116
1837	569.303	2	-0.00123488	HRNILEENL	FALSE	9	Q96R06	NA_NA_NA_NA_NA_NA_NA_NA_NA_NA_NA	0.0116
1838	482.789	2	-0.00668388	INVPPQIAL	FALSE	9	Q9P287	NA_NA_NA_NA_NA_NA_NA_NA_NA_NA_NA	0.0116
1840	650.337	2	-0.00368738	FRAPLLYEQY	FALSE	10	Q96F63	NA_NA_NA_NA_NA_NA_NA_NA_NA_NA_NA_NA	0.0116
1841	543.823	2	-0.00250688	KRFPQALNI	FALSE	9	Q6YBV0	NA_NA_NA_NA_NA_NA_NA_NA_NA_NA_NA	0.0116
1842	412.563	3	-8.6934e-05	IRYNSDLVQK	FALSE	10	Q06187	NA_NA_NA_NA_NA_NA_NA_NA_NA_NA_NA_NA	0.0116
1843	363.212	3	-0.000676595	TRDSNIIRL	FALSE	9	Q9NXC5	NA_NA_NA_NA_NA_NA_NA_NA_NA_NA_NA	0.0116
1844	580.365	2	0.00103512	GRFKDVLVLL	FALSE	10	Q92974	NA_NA_NA_NA_NA_NA_NA_NA_NA_NA_NA_NA	0.0116
1845	373.96	4	0.000705292	RRISFSASHRLY	FALSE	12	Q03393	NA_NA_NA_NA_NA_NA_NA_NA_NA_NA_NA_NA_NA_NA	0.0116
1846	539.798	2	-0.000854877	GRKDVVEYL	FALSE	9	Q9H2K2	NA_NA_NA_NA_NA_NA_NA_NA_NA_NA_NA	0.0116
1848	518.265	2	-0.00209038	ARFPETPAF	FALSE	9	Q9P2P5	NA_NA_NA_NA_NA_NA_NA_NA_NA_NA_NA	0.0116
1849	668.319	2	-0.00399388	YRWTEYGLTF	FALSE	10	P21796	NA_NA_NA_NA_NA_NA_NA_NA_NA_NA_NA_NA	0.0116
1851	465.558	3	-0.00123593	FRFERPDGSHF	FALSE	11	Q9Y2S7	NA_NA_NA_NA_NA_NA_NA_NA_NA_NA_NA_NA_NA	0.0116
1852	485.291	3	0.000767735	FRHLWNKALLR	FALSE	11	Q9H3S4	NA_NA_NA_NA_NA_NA_NA_NA_NA_NA_NA_NA_NA	0.0116
1853	404.872	3	-0.00116626	QRHFNINHF	FALSE	9	Q9UL01	NA_NA_NA_NA_NA_NA_NA_NA_NA_NA_NA	0.0116
1854	450.906	3	0.000198733	SRVLTQEDFQK	FALSE	11	Q9NVU7	NA_NA_NA_NA_NA_NA_NA_NA_NA_NA_NA_NA_NA	0.0116
1855	528.285	2	-0.00289988	GRLSHILEM	FALSE	9	P35520	NA_NA_NA_NA_NA_NA_NA_NA_NA_NA_NA	0.0116
1856	507.807	2	-0.00212538	GRVLFPVNL	FALSE	9	P17927	NA_NA_NA_NA_NA_NA_NA_NA_NA_NA_NA	0.0116
1857	606.796	2	-0.00362038	RRFWQGDTF	FALSE	9	Q9BUX1	NA_NA_NA_NA_NA_NA_NA_NA_NA_NA_NA	0.0116
1858	553.303	2	-0.00120388	KRNEFLGEL	FALSE	9	Q14141	NA_NA_NA_NA_NA_NA_NA_NA_NA_NA_NA	0.0115
1859	478.245	2	-0.00105388	SRIGTSTSF	FALSE	9	O95235	NA_NA_NA_NA_NA_NA_NA_NA_NA_NA_NA	0.0115
1860	371.56	3	0.000980069	MRDPIRILV	FALSE	9	Q14240	NA_NA_NA_NA_NA_NA_NA_NA_NA_NA_NA	0.0115
1861	481.271	2	-0.000541875	KADGVPVYL	FALSE	9	O14548	NA_NA_NA_NA_NA_NA_NA_NA_NA_NA_NA	0.0115
1862	448.224	3	-0.00191826	YRYGIKPEWM	FALSE	10	Q8TDI0	NA_NA_NA_NA_NA_NA_NA_NA_NA_NA_NA_NA	0.0115
1863	711.901	2	-0.00265088	SRIDLIPSLYVF	FALSE	12	Q99567	NA_NA_NA_NA_NA_NA_NA_NA_NA_NA_NA_NA_NA_NA	0.0115
1864	668.858	2	0.00139612	ARYVPSTPWFL	FALSE	11	Q9NYV6	NA_NA_NA_NA_NA_NA_NA_NA_NA_NA_NA_NA_NA	0.0115
1865	502.76	2	0.00227562	GRFHGGNLF	FALSE	9	P55789	NA_NA_NA_NA_NA_NA_NA_NA_NA_NA_NA	0.0115
1866	551.787	2	-0.00168938	IRFFGTTNF	FALSE	9	Q8N3C7	NA_NA_NA_NA_NA_NA_NA_NA_NA_NA_NA	0.0115
1867	401.906	3	0.00194473	ARVGTVLGQRF	FALSE	11	Q6P087	NA_NA_NA_NA_NA_NA_NA_NA_NA_NA_NA_NA_NA	0.0115
1868	594.856	2	-0.00364638	KRVAVILNEF	FALSE	10	Q8IUF1	NA_NA_NA_NA_NA_NA_NA_NA_NA_NA_NA_NA	0.0115
1869	532.319	2	-0.000525885	ARVPFLFTI	FALSE	9	Q7Z3Q1	NA_NA_NA_NA_NA_NA_NA_NA_NA_NA_NA	0.0115
1870	680.336	2	-0.00307588	QRFLVDQGYSF	FALSE	11	P19447	NA_NA_NA_NA_NA_NA_NA_NA_NA_NA_NA_NA_NA	0.0115
1871	437.876	3	0.000146404	QRFEEAHFTF	FALSE	10	Q9Y6X2	NA_NA_NA_NA_NA_NA_NA_NA_NA_NA_NA_NA	0.0115
1872	511.271	2	-0.000115382	GRLTVMTDL	FALSE	9	Q12907	NA_NA_NA_NA_NA_NA_MetOX_NA_NA_NA_NA	0.0115
1873	589.312	2	-0.00276888	SRLGIPDAVSY	FALSE	11	O94874	NA_NA_NA_NA_NA_NA_NA_NA_NA_NA_NA_NA_NA	0.0115
1874	627.833	2	0.00254512	ERFLGPEIFF	FALSE	10	P61158	NA_NA_NA_NA_NA_NA_NA_NA_NA_NA_NA_NA	0.0115
1876	528.269	2	-0.00271888	MRFDGLLGF	FALSE	9	Q9BRJ7	NA_NA_NA_NA_NA_NA_NA_NA_NA_NA_NA	0.0115
1877	664.795	2	-0.00435638	SRFAGSSPSQSSM	FALSE	13	P51617	NA_NA_NA_NA_NA_NA_NA_NA_NA_NA_NA_NA_NA_NA_NA	0.0116
1878	492.937	3	-2.39327e-05	SRLDWPVRTLSF	FALSE	12	Q96J01	NA_NA_NA_NA_NA_NA_NA_NA_NA_NA_NA_NA_NA_NA	0.0116
1880	571.274	2	-0.00117788	FLDLTEQEF	FALSE	9	Q9Y262	NA_NA_NA_NA_NA_NA_NA_NA_NA_NA_NA	0.0116
1881	396.584	3	-0.000945267	QRLKFRLNL	FALSE	9	P49720	NA_NA_NA_NA_NA_NA_NA_NA_NA_NA_NA	0.0115
1882	430.928	3	-0.000200598	RRFDPKLFLV	FALSE	10	O14524	NA_NA_NA_NA_NA_NA_NA_NA_NA_NA_NA_NA	0.0115
1883	449.243	3	4.0738e-05	HRFPFSSALQR	FALSE	11	Q9NQ11	NA_NA_NA_NA_NA_NA_NA_NA_NA_NA_NA_NA_NA	0.0115
1884	407.906	3	0.00320173	ARALFIRPFM	FALSE	10	Q9UG63	NA_NA_NA_NA_NA_NA_NA_NA_NA_NA_NA_NA	0.0115
1885	554.805	2	-0.00233388	TVMQFLEKL	FALSE	9	Q99797	NA_NA_NA_NA_NA_NA_NA_NA_NA_NA_NA	0.0116
1886	621.815	2	-0.000766877	HRINPQTTEF	FALSE	10	Q9UK59	NA_NA_NA_NA_NA_NA_NA_NA_NA_NA_NA_NA	0.0116
1887	569.295	2	-0.000682377	ARHPSFFLY	FALSE	9	P25774	NA_NA_NA_NA_NA_NA_NA_NA_NA_NA_NA	0.0116
1888	371.736	4	5.54456e-06	RRVSLRVLSERL	FALSE	12	Q96AZ6	NA_NA_NA_NA_NA_NA_NA_NA_NA_NA_NA_NA_NA_NA	0.0116
1889	366.198	3	-0.000256595	GRLDDFFKV	FALSE	9	P39748	NA_NA_NA_NA_NA_NA_NA_NA_NA_NA_NA	0.0116
1890	609.359	2	-0.00124538	RQASVIIQRF	FALSE	10	B2RTY4	NA_NA_NA_NA_NA_NA_NA_NA_NA_NA_NA_NA	0.0116
1891	490.264	2	-0.000947383	LRASVETGF	FALSE	9	Q9BRQ8	NA_NA_NA_NA_NA_NA_NA_NA_NA_NA_NA	0.0116
1892	596.844	2	-0.00332488	MRQKAVSLFL	FALSE	10	P09912	NA_NA_NA_NA_NA_NA_NA_NA_NA_NA_NA_NA	0.0116
1894	478.798	2	-0.000857875	GRVDVVKAL	FALSE	9	Q63ZY3	NA_NA_NA_NA_NA_NA_NA_NA_NA_NA_NA	0.0116
1895	600.345	2	-0.00394638	KRLWQQVEL	FALSE	9	Q9P219	NA_NA_NA_NA_NA_NA_NA_NA_NA_NA_NA	0.0116
1897	559.298	2	-0.00125638	KRWWSAGGGL	FALSE	10	Q9Y4A8	NA_NA_NA_NA_NA_NA_NA_NA_NA_NA_NA_NA	0.0118
1898	584.316	2	-0.00345788	QRFVFPVQF	FALSE	9	Q4AC94	NA_NA_NA_NA_NA_NA_NA_NA_NA_NA_NA	0.0118
1899	495.603	3	-0.000365595	GRIYLDMLNVYK	FALSE	12	O14980	NA_NA_NA_NA_NA_NA_NA_NA_NA_NA_NA_NA_NA_NA	0.0118
1900	489.613	3	4.77384e-05	RQVSITGFFQRK	FALSE	12	Q15054	NA_NA_NA_NA_NA_NA_NA_NA_NA_NA_NA_NA_NA_NA	0.0118
1901	486.705	2	-0.000385885	GRFGSGMNM	FALSE	9	P52272	NA_NA_NA_NA_NA_NA_NA_NA_NA_MetOX_NA	0.0118
1902	408.86	3	0.000108069	GRISDFHETY	FALSE	10	Q6W2J9	NA_NA_NA_NA_NA_NA_NA_NA_NA_NA_NA_NA	0.0118
1903	421.236	3	-0.000493935	GRISTVELQKM	FALSE	11	Q8NDZ6	NA_NA_NA_NA_NA_NA_NA_NA_NA_NA_NA_NA_NA	0.0118
1904	447.255	3	-0.00110593	RRFVIFPIEY	FALSE	10	P31350	NA_NA_NA_NA_NA_NA_NA_NA_NA_NA_NA_NA	0.0118
1905	587.303	2	-0.00163488	ARILNHDTSF	FALSE	10	P51955	NA_NA_NA_NA_NA_NA_NA_NA_NA_NA_NA_NA	0.0118
1906	454.935	3	0.0002564	VRIDPFVRTFL	FALSE	11	P39656	NA_NA_NA_NA_NA_NA_NA_NA_NA_NA_NA_NA_NA	0.0118
1907	532.661	3	0.00120907	IRLPPEVNRILYI	FALSE	13	Q9Y3B4	NA_NA_NA_NA_NA_NA_NA_NA_NA_NA_NA_NA_NA_NA_NA	0.0118
1908	360.863	3	0.000877069	VRMPYACKL	FALSE	9	P30876	NA_NA_NA_NA_NA_NA_NA_NA_NA_NA_NA	0.0118
1909	751.869	2	0.00120312	ADFEYRKTTAFGP	FALSE	13	Q8ND56	NA_NA_NA_NA_NA_NA_NA_NA_NA_NA_NA_NA_NA_NA_NA	0.0118
1910	539.815	2	-0.00154688	SRLKESFLV	FALSE	9	Q12788	NA_NA_NA_NA_NA_NA_NA_NA_NA_NA_NA	0.0117
1911	485.787	2	-0.00128988	ARNVVLDAL	FALSE	9	Q96ME1	NA_NA_NA_NA_NA_NA_NA_NA_NA_NA_NA	0.0117
1912	482.783	2	0.000392617	SRFGSKLGL	FALSE	9	P11511	NA_NA_NA_NA_NA_NA_NA_NA_NA_NA_NA	0.0117
1913	376.573	3	0.0009834	RRLDIVRSL	FALSE	9	P40337	NA_NA_NA_NA_NA_NA_NA_NA_NA_NA_NA	0.0117
1914	547.784	2	-0.00184688	ARTDIVSWF	FALSE	9	Q9UKY1	NA_NA_NA_NA_NA_NA_NA_NA_NA_NA_NA	0.0117
1915	538.311	2	-0.00099738	TRSELLPFL	FALSE	9	P30154-2	NA_NA_NA_NA_NA_NA_NA_NA_NA_NA_NA	0.0117
1916	655.857	2	-0.00264388	KRLDVYLQEF	FALSE	10	Q2M389	NA_NA_NA_NA_NA_NA_NA_NA_NA_NA_NA_NA	0.0117
1917	570.779	2	-0.00229288	VRFLNMETM	FALSE	9	Q96BS2	NA_NA_NA_NA_NA_NA_NA_NA_NA_NA_NA	0.0117
1918	413.539	3	0.0021564	GRMEEGSIGRF	FALSE	11	Q6NUM9	NA_NA_NA_NA_NA_NA_NA_NA_NA_NA_NA_NA_NA	0.0117
1919	506.764	2	-0.00111438	SRANSLFAF	FALSE	9	P61009	NA_NA_NA_NA_NA_NA_NA_NA_NA_NA_NA	0.0117
1920	495.295	2	-0.00402538	AQFGGKILR	FALSE	9	Q9P1Y6	NA_NA_NA_NA_NA_NA_NA_NA_NA_NA_NA	0.0117
1921	483.594	3	0.000442071	KRNDYVHALVAY	FALSE	12	Q99873	NA_NA_NA_NA_NA_NA_NA_NA_NA_NA_NA_NA_NA_NA	0.0117
1923	405.864	3	0.000274734	SRLGDPAEYAH	FALSE	11	Q99714	NA_NA_NA_NA_NA_NA_NA_NA_NA_NA_NA_NA_NA	0.0117
1924	541.838	2	-0.000514878	QRALLLQQL	FALSE	9	Q9ULV3	NA_NA_NA_NA_NA_NA_NA_NA_NA_NA_NA	0.0117
1925	570.844	2	-0.00247088	GRLDAVLQRI	FALSE	10	P29590	NA_NA_NA_NA_NA_NA_NA_NA_NA_NA_NA_NA	0.0117
1926	505.293	3	0.000610067	RRFVGHTKDVLSV	FALSE	13	P63244	NA_NA_NA_NA_NA_NA_NA_NA_NA_NA_NA_NA_NA_NA_NA	0.0117
1927	487.782	2	0.000358624	EKFTELLL	FALSE	8	Q9NQC7	pyrGlu_NA_NA_NA_NA_NA_NA_NA_NA_NA	0.0117
1928	525.782	2	-0.00120438	ARIATSLDGF	FALSE	10	O60664	NA_NA_NA_NA_NA_NA_NA_NA_NA_NA_NA_NA	0.0117
1929	560.352	2	-0.00233188	AQLRLVLGLH	FALSE	10	P51124	NA_NA_NA_NA_NA_NA_NA_NA_NA_NA_NA_NA	0.0117
1930	510.793	2	-0.00321488	GRFVTVQTI	FALSE	9	P00505	NA_NA_NA_NA_NA_NA_NA_NA_NA_NA_NA	0.0121
1931	646.363	2	-0.00456988	RRFVNVVPTFG	FALSE	11	P62861	NA_NA_NA_NA_NA_NA_NA_NA_NA_NA_NA_NA_NA	0.0121
1933	532.779	2	-0.00264988	SRTPVLMNF	FALSE	9	Q9H3K2	NA_NA_NA_NA_NA_NA_NA_NA_NA_NA_NA	0.0121
1934	506.319	2	-0.000657381	IRIPGGGITK	FALSE	10	Q969U7	NA_NA_NA_NA_NA_NA_NA_NA_NA_NA_NA_NA	0.0121
1935	497.77	2	0.000203117	ARSQLTATF	FALSE	9	J3QKQ9	NA_NA_NA_NA_NA_NA_NA_NA_NA_NA_NA	0.0121
1936	366.218	3	-7.39344e-05	LRIPSAFRH	FALSE	9	Q86UB9	NA_NA_NA_NA_NA_NA_NA_NA_NA_NA_NA	0.0122
1937	543.279	2	-0.00203188	FGNAFLNRF	FALSE	9	Q9H223	NA_NA_NA_NA_NA_NA_NA_NA_NA_NA_NA	0.0122
1938	635.367	2	-0.00257888	LRLPPQATFQV	FALSE	11	Q96L08	NA_NA_NA_NA_NA_NA_NA_NA_NA_NA_NA_NA_NA	0.0122
1939	460.255	3	4.67376e-05	KRFDEWKELK	FALSE	10	Q53GS7	NA_NA_NA_NA_NA_NA_NA_NA_NA_NA_NA_NA	0.0122
1940	759.918	2	-0.00513788	GRLGTFETQILQR	FALSE	13	O76031	NA_NA_NA_NA_NA_NA_NA_NA_NA_NA_NA_NA_NA_NA_NA	0.0122
1941	436.947	3	4.73286e-06	HRLIIKPYLR	FALSE	10	Q9NVH1	NA_NA_NA_NA_NA_NA_NA_NA_NA_NA_NA_NA	0.0121
1942	582.303	2	-0.00424388	KRLDQELDF	FALSE	9	P37198	NA_NA_NA_NA_NA_NA_NA_NA_NA_NA_NA	0.0121
1943	514.825	2	-0.00231488	ARVKLVTEL	FALSE	9	Q5T3U5	NA_NA_NA_NA_NA_NA_NA_NA_NA_NA_NA	0.0121
1944	409.552	3	-0.000633933	HRFLGIPYSH	FALSE	10	P15289	NA_NA_NA_NA_NA_NA_NA_NA_NA_NA_NA_NA	0.0121
1945	550.827	2	0.000185125	LRLDPNFLL	FALSE	9	Q9BXW9	NA_NA_NA_NA_NA_NA_NA_NA_NA_NA_NA	0.0121
1946	546.791	2	-0.00260338	SRTNQLAVGF	FALSE	10	Q8WYP5	NA_NA_NA_NA_NA_NA_NA_NA_NA_NA_NA_NA	0.0121
1947	558.284	2	-0.000102881	GRHNVTDVAF	FALSE	10	Q8IY26	NA_NA_NA_NA_NA_NA_NA_NA_NA_NA_NA_NA	0.0121
1948	502.798	2	-0.000557384	ARFSPKVSL	FALSE	9	Q14669	NA_NA_NA_NA_NA_NA_NA_NA_NA_NA_NA	0.0121
1949	457.775	2	-0.000482375	ARAIVNSAL	FALSE	9	O94901	NA_NA_NA_NA_NA_NA_NA_NA_NA_NA_NA	0.0121
1950	549.792	2	-0.000718379	GRKPMLYSF	FALSE	9	P50416	NA_NA_NA_NA_NA_NA_NA_NA_NA_NA_NA	0.0121
1951	608.836	2	-0.00241088	TRAPAELKSPF	FALSE	11	Q9UP83	NA_NA_NA_NA_NA_NA_NA_NA_NA_NA_NA_NA_NA	0.0121
1952	625.331	2	-0.00253038	VRNWAVWRY	FALSE	9	Q96PD7	NA_NA_NA_NA_NA_NA_NA_NA_NA_NA_NA	0.0121
1954	613.881	2	-0.00446438	ARFLPSPVVIK	FALSE	11	Q13618	NA_NA_NA_NA_NA_NA_NA_NA_NA_NA_NA_NA_NA	0.0121
1955	558.3	2	-0.000476385	MRYVASYLL	FALSE	9	P05387	NA_NA_NA_NA_NA_NA_NA_NA_NA_NA_NA	0.0121
1956	393.867	3	0.00183407	YDFSHEILR	FALSE	9	Q9BT30	NA_NA_NA_NA_NA_NA_NA_NA_NA_NA_NA	0.0121
1957	566.311	2	-0.00251488	MRGGELLDKI	FALSE	10	Q15418	NA_NA_NA_NA_NA_NA_NA_NA_NA_NA_NA_NA	0.0121
1958	477.217	3	8.47411e-05	RRFDEDDDKSF	FALSE	11	Q13136	NA_NA_NA_NA_NA_NA_NA_NA_NA_NA_NA_NA_NA	0.0121
1959	387.2	3	-0.000848598	GRSLGTADVHF	FALSE	11	Q86V81	NA_NA_NA_NA_NA_NA_NA_NA_NA_NA_NA_NA_NA	0.0121
1960	585.805	2	-0.00221438	ARIFQFQNF	FALSE	9	Q2NL82	NA_NA_NA_NA_NA_NA_NA_NA_NA_NA_NA	0.0125
1961	619.793	2	5.01235e-05	KRMPWGWDY	FALSE	9	Q9NZC9	NA_NA_NA_NA_NA_NA_NA_NA_NA_NA_NA	0.0125
1962	491.812	2	-0.000199384	ARLSIRPGL	FALSE	9	Q9H668	NA_NA_NA_NA_NA_NA_NA_NA_NA_NA_NA	0.0125
1963	422.882	3	0.00128973	ARDMESALRAF	FALSE	11	P49662	NA_NA_NA_NA_NA_NA_NA_NA_NA_NA_NA_NA_NA	0.0125
1964	528.771	2	-0.00197438	GRWSFLPGH	FALSE	9	P78381-3	NA_NA_NA_NA_NA_NA_NA_NA_NA_NA_NA	0.0125
1965	501.9	3	-0.00082726	HRLDEDWDSALF	FALSE	12	P18850	NA_NA_NA_NA_NA_NA_NA_NA_NA_NA_NA_NA_NA_NA	0.0125
1966	531.784	2	-0.00512088	QRLSFSVSR	FALSE	9	Q8N983	pyrGlu_NA_NA_NA_NA_NA_NA_NA_NA_NA_NA	0.0125
1967	438.895	3	-0.000303263	FRVFMENLMK	FALSE	10	P22681	NA_NA_NA_NA_NA_NA_NA_NA_NA_NA_NA_NA	0.0125
1968	531.933	3	0.00209074	SRWQESSEKRPGF	FALSE	13	Q6PJF5	NA_NA_NA_NA_NA_NA_NA_NA_NA_NA_NA_NA_NA_NA_NA	0.0128
1969	441.263	3	-0.000571935	HRIGLPPKIGSF	FALSE	12	Q8TCG2	NA_NA_NA_NA_NA_NA_NA_NA_NA_NA_NA_NA_NA_NA	0.0128
1970	415.917	3	0.00113907	IQRTPKIQVY	FALSE	10	P61769	NA_NA_NA_NA_NA_NA_NA_NA_NA_NA_NA_NA	0.013
1971	566.774	2	-0.00177938	SRFDASFFGV	FALSE	10	P49327	NA_NA_NA_NA_NA_NA_NA_NA_NA_NA_NA_NA	0.013
1973	419.92	3	0.000694733	RRLEPAIQKF	FALSE	10	P56962	NA_NA_NA_NA_NA_NA_NA_NA_NA_NA_NA_NA	0.013
1975	452.905	3	-0.000823926	ARFGSVNELLNH	FALSE	12	Q13129	NA_NA_NA_NA_NA_NA_NA_NA_NA_NA_NA_NA_NA_NA	0.013
1976	393.22	3	-0.00128393	KRWAASPKSF	FALSE	10	Q9Y490	NA_NA_NA_NA_NA_NA_NA_NA_NA_NA_NA_NA	0.013
1978	549.284	2	-0.00168038	VRAEIYEAF	FALSE	9	P20226	NA_NA_NA_NA_NA_NA_NA_NA_NA_NA_NA	0.013
1979	389.905	3	-0.000296266	GRVPYPRIPL	FALSE	10	P41240	NA_NA_NA_NA_NA_NA_NA_NA_NA_NA_NA_NA	0.013
1980	651.335	2	-0.00302138	QRLPPEVANFM	FALSE	11	Q14160	NA_NA_NA_NA_NA_NA_NA_NA_NA_NA_NA_NA_NA	0.013
1981	621.819	2	0.00229012	ITVGYVDDTLF	FALSE	11	P03989;P30485	NA_NA_NA_NA_NA_NA_NA_NA_NA_NA_NA_NA_NA	0.013
1982	506.234	2	-0.000175383	SRMDVTSCI	FALSE	9	Q9Y6Y0	NA_NA_NA_NA_NA_NA_NA_NA_NA_NA_NA	0.013
1983	554.809	2	-0.00256538	GRVGIFPISY	FALSE	10	O94875	NA_NA_NA_NA_NA_NA_NA_NA_NA_NA_NA_NA	0.0131
1984	606.367	2	0.000261116	KRFGPNVPALL	FALSE	11	Q96SB8	NA_NA_NA_NA_NA_NA_NA_NA_NA_NA_NA_NA_NA	0.0131
1985	441.917	3	-0.00622727	YRAQILRIQY	FALSE	10	Q6PIW4	NA_NA_NA_NA_NA_NA_NA_NA_NA_NA_NA_NA	0.0133
1986	478.241	3	9.27361e-05	RRFQQDDAHIF	FALSE	11	A2RTX5	NA_NA_NA_NA_NA_NA_NA_NA_NA_NA_NA_NA_NA	0.0133
1987	524.3	2	-0.00126488	ARADFQKVL	FALSE	9	Q02790	NA_NA_NA_NA_NA_NA_NA_NA_NA_NA_NA	0.0133
1988	549.825	2	-0.000406878	KRFGPNVPAL	FALSE	10	Q96SB8	NA_NA_NA_NA_NA_NA_NA_NA_NA_NA_NA_NA	0.0133
1989	374.554	3	-0.000663593	GRLIPGAYKF	FALSE	10	Q9HCK8	NA_NA_NA_NA_NA_NA_NA_NA_NA_NA_NA_NA	0.0133
1990	443.595	3	-0.00122226	KRLEAVKPTVGM	FALSE	12	Q9P2B7	NA_NA_NA_NA_NA_NA_NA_NA_NA_NA_NA_NA_NA_NA	0.0133
1991	399.236	3	-0.000734598	GRYLGKKVQF	FALSE	10	P55199	NA_NA_NA_NA_NA_NA_NA_NA_NA_NA_NA_NA	0.0133
1993	510.304	2	-0.000207375	ARSLQKLGF	FALSE	9	P62380	NA_NA_NA_NA_NA_NA_NA_NA_NA_NA_NA	0.0133
1994	492.803	2	0.00116862	RTLRTGPAL	FALSE	9	P23434	NA_NA_NA_NA_NA_NA_NA_NA_NA_NA_NA	0.0133
1995	477.793	2	0.000555622	LWPKIQGL	FALSE	8	Q9NX09	NA_NA_NA_NA_NA_NA_NA_NA_NA_NA	0.0133
1996	557.778	2	-0.00226138	QRISSFETF	FALSE	9	Q14005	NA_NA_NA_NA_NA_NA_NA_NA_NA_NA_NA	0.0133
1997	539.779	2	0.00127462	SRWPAFPAF	FALSE	9	O75064	NA_NA_NA_NA_NA_NA_NA_NA_NA_NA_NA	0.0133
1998	410.26	3	0.000538067	QRLHLPPVRL	FALSE	10	P30533	NA_NA_NA_NA_NA_NA_NA_NA_NA_NA_NA_NA	0.0133
1999	585.292	2	-0.000782882	ARYVQPMASF	FALSE	10	Q7KZ85	NA_NA_NA_NA_NA_NA_NA_NA_NA_NA_NA_NA	0.0133
2000	372.207	3	0.000977401	ARLDHKFDL	FALSE	9	P68363	NA_NA_NA_NA_NA_NA_NA_NA_NA_NA_NA	0.0133
2001	509.271	2	0.00464412	FIGNLDPEI	FALSE	9	Q15427	NA_NA_NA_NA_NA_NA_NA_NA_NA_NA_NA	0.0133
2002	625.285	2	-0.00101138	YRNEFTAWY	FALSE	9	A0A087WZV9	NA_NA_NA_NA_NA_NA_NA_NA_NA_NA_NA	0.0133
2003	515.825	2	0.000824622	VRFLGNLVL	FALSE	9	Q5VZM2	NA_NA_NA_NA_NA_NA_NA_NA_NA_NA_NA	0.0133
2004	359.875	3	0.00102707	SRDAQIKFL	FALSE	9	Q8ND90	NA_NA_NA_NA_NA_NA_NA_NA_NA_NA_NA	0.0133
2005	556.312	2	0.000902118	ARVIFITEY	FALSE	9	Q9UHY1	NA_NA_NA_NA_NA_NA_NA_NA_NA_NA_NA	0.0133
2006	468.271	2	0.000867118	GRAALITSF	FALSE	9	Q9H7F0	NA_NA_NA_NA_NA_NA_NA_NA_NA_NA_NA	0.0133
2007	575.314	2	-0.00720838	FQVLCVLTNL	FALSE	10	H7BZ38	NA_NA_NA_NA_NA_NA_NA_NA_NA_NA_NA_NA	0.0133
2008	475.933	3	-0.00253259	LRVDPAKGLFYF	FALSE	12	O75643	NA_NA_NA_NA_NA_NA_NA_NA_NA_NA_NA_NA_NA_NA	0.0133
2009	514.317	2	-0.00061488	QRAQVSLLI	FALSE	9	Q99623	NA_NA_NA_NA_NA_NA_NA_NA_NA_NA_NA	0.0133
2010	636.819	2	-0.000598384	KRFMWRDSF	FALSE	9	O43298	NA_NA_NA_NA_NA_NA_NA_NA_NA_NA_NA	0.0133
2011	648.339	2	-0.00231838	YRLGNVDAFQL	FALSE	11	Q6P2Q9	NA_NA_NA_NA_NA_NA_NA_NA_NA_NA_NA_NA_NA	0.0133
2012	497.632	3	-0.00166459	VRIDPFVRTFLK	FALSE	12	P39656	NA_NA_NA_NA_NA_NA_NA_NA_NA_NA_NA_NA_NA_NA	0.0136
2013	424.234	3	-0.00230526	SRIHPVSTMVK	FALSE	11	P07195	NA_NA_NA_NA_NA_NA_NA_NA_NA_MetOX_NA_NA_NA	0.0136
2014	405.248	3	-0.00073993	IRYPDPLIKV	FALSE	10	P62701	NA_NA_NA_NA_NA_NA_NA_NA_NA_NA_NA_NA	0.0136
2015	486.802	2	-0.00124338	ARAKIPLGF	FALSE	9	Q9NR09	NA_NA_NA_NA_NA_NA_NA_NA_NA_NA_NA	0.0136
2016	497.272	2	-0.000572877	ERVGLTVGY	FALSE	9	Q6P158	NA_NA_NA_NA_NA_NA_NA_NA_NA_NA_NA	0.0137
2017	408.897	3	-0.000747259	HRMWGRLVGL	FALSE	10	Q7KZN9	NA_NA_NA_NA_NA_NA_NA_NA_NA_NA_NA_NA	0.0137
2018	545.312	2	-0.000863876	GRNKFGQLGL	FALSE	10	Q5GLZ8	NA_NA_NA_NA_NA_NA_NA_NA_NA_NA_NA_NA	0.0137
2019	519.266	2	0.00227462	ARQLQSFGM	FALSE	9	O60341	NA_NA_NA_NA_NA_NA_NA_NA_NA_NA_NA	0.0137
2020	591.309	2	-0.00379438	SRFGNAFLNR	FALSE	10	Q9H223	NA_NA_NA_NA_NA_NA_NA_NA_NA_NA_NA_NA	0.0137
2021	597.805	2	0.000397624	NRFSGVPDRF	FALSE	10	A0A075B6R9	NA_NA_NA_NA_NA_NA_NA_NA_NA_NA_NA_NA	0.0137
2022	501.953	3	0.000214068	RRFSDQFPLPLK	FALSE	12	Q92973	NA_NA_NA_NA_NA_NA_NA_NA_NA_NA_NA_NA_NA_NA	0.0137
2023	468.913	3	-0.000356932	ARMPEKVTWMR	FALSE	11	P84098	NA_NA_NA_NA_NA_NA_NA_NA_NA_NA_NA_NA_NA	0.0138
2024	402.552	3	-0.00102227	GRWPKKSAEF	FALSE	10	P18621	NA_NA_NA_NA_NA_NA_NA_NA_NA_NA_NA_NA	0.0138
2025	649.859	2	-0.000743381	GRIKEVSVFTY	FALSE	11	O00443	NA_NA_NA_NA_NA_NA_NA_NA_NA_NA_NA_NA_NA	0.0138
2026	658.41	2	-0.00471988	LRILFNNAVKK	FALSE	11	P08243	NA_NA_NA_NA_NA_NA_NA_NA_NA_NA_NA_NA_NA	0.0138
2027	595.317	2	-0.00062338	RRMWATQGLA	FALSE	10	P55145	NA_NA_NA_NA_NA_NA_NA_NA_NA_NA_NA_NA	0.0138
2028	549.788	2	-0.000421881	GRVADVYRY	FALSE	9	Q86U90	NA_NA_NA_NA_NA_NA_NA_NA_NA_NA_NA	0.0138
2029	521.751	2	-0.00110488	GRGQFSEVY	FALSE	9	Q9HC98	NA_NA_NA_NA_NA_NA_NA_NA_NA_NA_NA	0.0138
2030	495.754	2	-4.7381e-05	GQYGNPLNK	FALSE	9	O14672	NA_NA_NA_NA_NA_NA_NA_NA_NA_NA_NA	0.0138
2031	523.303	2	0.00123212	GRLFAVVHF	FALSE	9	Q7Z2W9	NA_NA_NA_NA_NA_NA_NA_NA_NA_NA_NA	0.0138
2033	451.259	3	0.000590406	RRFVEVGRVAY	FALSE	11	P50914	NA_NA_NA_NA_NA_NA_NA_NA_NA_NA_NA_NA_NA	0.0138
2034	518.294	2	-0.00134788	DRKLVEYL	FALSE	8	Q9HAW7	NA_NA_NA_NA_NA_NA_NA_NA_NA_NA	0.0138
2035	384.878	3	0.000394071	SRFLNKQPY	FALSE	9	P10619	NA_NA_NA_NA_NA_NA_NA_NA_NA_NA_NA	0.0138
2036	350.197	3	-0.000105264	ARTMVMRAL	FALSE	9	Q15751	NA_NA_NA_NA_NA_NA_NA_NA_NA_NA_NA	0.0138
2037	537.801	2	-0.000697378	VRADPSLLGF	FALSE	10	Q6Y7W6	NA_NA_NA_NA_NA_NA_NA_NA_NA_NA_NA_NA	0.0138
2038	714.886	2	-0.00550988	ARYPHAAVNGLFL	FALSE	13	Q9Y3B6	NA_NA_NA_NA_NA_NA_NA_NA_NA_NA_NA_NA_NA_NA_NA	0.0138
2039	416.94	3	4.80697e-05	RRFLKLLRF	FALSE	9	O43674	NA_NA_NA_NA_NA_NA_NA_NA_NA_NA_NA	0.0138
2040	450.767	2	-0.000357884	ARAGVSQVL	FALSE	9	P30876	NA_NA_NA_NA_NA_NA_NA_NA_NA_NA_NA	0.0138
2041	556.836	2	-0.00244888	WRLRLGGAAL	FALSE	10	P53801	NA_NA_NA_NA_NA_NA_NA_NA_NA_NA_NA_NA	0.0138
2042	524.83	2	-0.000257884	GRTVILYKV	FALSE	9	Q9H8H0	NA_NA_NA_NA_NA_NA_NA_NA_NA_NA_NA	0.0138
2043	538.317	2	-0.000114378	KRFGVNIEI	FALSE	9	Q8TDB6	NA_NA_NA_NA_NA_NA_NA_NA_NA_NA_NA	0.0138
2044	509.808	2	0.00121712	ARLEKAIAF	FALSE	9	H0YIV9	NA_NA_NA_NA_NA_NA_NA_NA_NA_NA_NA	0.0138
2045	575.304	2	-0.00234688	GRLPGTIWSY	FALSE	10	Q5TF58	NA_NA_NA_NA_NA_NA_NA_NA_NA_NA_NA_NA	0.0138
2046	442.597	3	-0.000813595	RRDLAQALINR	FALSE	11	P46087	NA_NA_NA_NA_NA_NA_NA_NA_NA_NA_NA_NA_NA	0.0138
2048	498.301	2	-0.00270788	GRIAIPGLAGA	FALSE	11	P26599	NA_NA_NA_NA_NA_NA_NA_NA_NA_NA_NA_NA_NA	0.0138
2049	664.833	2	-0.00405438	ARMGIFQETLY	FALSE	11	Q969S0	NA_NA_NA_NA_NA_NA_NA_NA_NA_NA_NA_NA_NA	0.0138
2050	396.56	3	0.000311737	RRSINQPVAF	FALSE	10	Q9GZT3	NA_NA_NA_NA_NA_NA_NA_NA_NA_NA_NA_NA	0.0138
2051	541.311	2	-0.000732376	SRFGKFIQV	FALSE	9	B2RTY4	NA_NA_NA_NA_NA_NA_NA_NA_NA_NA_NA	0.0138
2052	606.314	2	-0.00384338	MRIKILGDCY	FALSE	10	Q08462	NA_NA_NA_NA_NA_NA_NA_NA_NA_NA_NA_NA	0.0138
2054	505.959	3	-0.00142893	VRIDNRLLEKPY	FALSE	12	Q9Y520	NA_NA_NA_NA_NA_NA_NA_NA_NA_NA_NA_NA_NA_NA	0.0139
2055	380.241	3	-0.00100826	IRLPHVKYI	FALSE	9	O95372	NA_NA_NA_NA_NA_NA_NA_NA_NA_NA_NA	0.0139
2056	388.891	3	-0.00227927	QRLFQFIGR	FALSE	9	Q9P253	NA_NA_NA_NA_NA_NA_NA_NA_NA_NA_NA	0.0139
2057	591.815	2	-0.00237888	GRAEKVTFQF	FALSE	10	Q9Y512	NA_NA_NA_NA_NA_NA_NA_NA_NA_NA_NA_NA	0.0139
2058	452.605	3	0.00118307	VRWSPVRPLVF	FALSE	11	Q96EX3	NA_NA_NA_NA_NA_NA_NA_NA_NA_NA_NA_NA_NA	0.0142
2060	601.798	2	0.00148762	QRVEPEWYI	FALSE	9	Q02880	pyrGlu_NA_NA_NA_NA_NA_NA_NA_NA_NA_NA	0.0142
2061	546.276	2	-0.00198688	QRQEEAFAL	FALSE	9	Q6P158	NA_NA_NA_NA_NA_NA_NA_NA_NA_NA_NA	0.0142
2062	570.795	2	-0.00051538	FRFDPQFAL	FALSE	9	P01909	NA_NA_NA_NA_NA_NA_NA_NA_NA_NA_NA	0.0142
2063	485.804	2	-0.00208288	ARALVQSLL	FALSE	9	Q9NX46	NA_NA_NA_NA_NA_NA_NA_NA_NA_NA_NA	0.0142
2065	564.361	2	-2.18777e-05	KRVELLKEL	FALSE	9	P33991	NA_NA_NA_NA_NA_NA_NA_NA_NA_NA_NA	0.0142
2066	613.321	2	0.00633112	LRLPADGSFSY	FALSE	11	Q8IYD9	NA_NA_NA_NA_NA_NA_NA_NA_NA_NA_NA_NA_NA	0.0142
2067	389.906	3	0.000204069	RRISVFKYV	FALSE	9	Q6NTF9	NA_NA_NA_NA_NA_NA_NA_NA_NA_NA_NA	0.0142
2068	537.811	2	-0.000561385	SRLTKVEEL	FALSE	9	Q96T88	NA_NA_NA_NA_NA_NA_NA_NA_NA_NA_NA	0.0142
2069	690.85	2	-0.00109238	RREDIVDTMVF	FALSE	11	Q8WWM7	NA_NA_NA_NA_NA_NA_NA_NA_NA_NA_NA_NA_NA	0.0142
2070	512.817	2	-0.00179338	ARWLVLAPV	FALSE	9	Q9H4I9	NA_NA_NA_NA_NA_NA_NA_NA_NA_NA_NA	0.0142
2071	485.76	2	-0.00141838	GRAPQTPLM	FALSE	9	Q96M27	NA_NA_NA_NA_NA_NA_NA_NA_NA_NA_NA	0.0146
2072	529.912	3	-0.0013556	YRWSFDETVTHF	FALSE	12	Q92547	NA_NA_NA_NA_NA_NA_NA_NA_NA_NA_NA_NA_NA_NA	0.0146
2073	473.926	3	0.0013494	RQMEPFPLRVF	FALSE	11	Q9HBH1	NA_NA_NA_NA_NA_NA_NA_NA_NA_NA_NA_NA_NA	0.0146
2074	450.247	3	-0.00433193	LRYPPDIRATF	FALSE	11	O95248	NA_NA_NA_NA_NA_NA_NA_NA_NA_NA_NA_NA_NA	0.0146
2075	750.38	2	0.00463412	SRFKNEVERMGF	FALSE	12	Q13615	NA_NA_NA_NA_NA_NA_NA_NA_NA_NA_NA_NA_NA_NA	0.0146
2076	466.928	3	0.000840404	HRFPFSRPELL	FALSE	11	Q8WTV1	NA_NA_NA_NA_NA_NA_NA_NA_NA_NA_NA_NA_NA	0.0146
2077	495.298	2	-0.00112538	QRLGAKLGF	FALSE	9	Q9Y487	NA_NA_NA_NA_NA_NA_NA_NA_NA_NA_NA	0.0146
2078	491.605	3	0.000755066	RRRDPELPVTSF	FALSE	12	Q96EQ8	NA_NA_NA_NA_NA_NA_NA_NA_NA_NA_NA_NA_NA_NA	0.0147
2079	500.275	3	0.000992399	HRLDKETTGVMVL	FALSE	13	Q96CM3	NA_NA_NA_NA_NA_NA_NA_NA_NA_NA_NA_NA_NA_NA_NA	0.0147
2080	590.817	2	-0.00405288	NRMLKQMLF	FALSE	9	Q99436	NA_NA_NA_NA_NA_NA_NA_NA_NA_NA_NA	0.0147
2081	669.828	2	-0.00291488	KRFDDPGLMLM	FALSE	11	P12956	NA_NA_NA_NA_NA_NA_NA_NA_NA_NA_NA_MetOX_NA	0.0147
2082	577.317	2	-0.00388588	QRQDLELRL	FALSE	9	Q96CN9	pyrGlu_NA_NA_NA_NA_NA_NA_NA_NA_NA_NA	0.0147
2083	563.269	2	-0.00116188	SRFGGDQPVY	FALSE	10	Q9Y2C2	NA_NA_NA_NA_NA_NA_NA_NA_NA_NA_NA_NA	0.0147
2084	736.86	2	0.00471362	GSSQIKQEPDPTW	FALSE	13	P78347	NA_NA_NA_NA_NA_NA_NA_NA_NA_NA_NA_NA_NA_NA_NA	0.015
2085	477.277	3	-5.79318e-05	ARWLGTLDKKLE	FALSE	12	Q9UFH2	NA_NA_NA_NA_NA_NA_NA_NA_NA_NA_NA_NA_NA_NA	0.015
2086	440.246	3	-0.000269592	RRQDAKGLFEV	FALSE	11	Q9ULE3	NA_NA_NA_NA_NA_NA_NA_NA_NA_NA_NA_NA_NA	0.015
2087	504.933	3	-0.0015036	ARFKDELDIMKF	FALSE	12	Q86SZ2	NA_NA_NA_NA_NA_NA_NA_NA_NA_NA_NA_NA_NA_NA	0.015
2088	644.314	2	-0.00113388	WRYSSAFTNR	FALSE	10	Q9H0U3	NA_NA_NA_NA_NA_NA_NA_NA_NA_NA_NA_NA	0.015
2089	387.55	3	0.000188065	FRSLPRHTF	FALSE	9	Q6UW68	NA_NA_NA_NA_NA_NA_NA_NA_NA_NA_NA	0.015
2090	544.83	2	-0.00263188	RRFIVVEGL	FALSE	9	O15269	NA_NA_NA_NA_NA_NA_NA_NA_NA_NA_NA	0.015
2091	554.292	2	-0.00153688	QRTALQEVY	FALSE	9	O15397	NA_NA_NA_NA_NA_NA_NA_NA_NA_NA_NA	0.0152
2093	582.839	2	-0.00155388	KRIGTVGIASY	FALSE	11	Q6V1X1	NA_NA_NA_NA_NA_NA_NA_NA_NA_NA_NA_NA_NA	0.0152
2094	405.239	3	0.000185403	SRNEALAALLR	FALSE	11	P13797	NA_NA_NA_NA_NA_NA_NA_NA_NA_NA_NA_NA_NA	0.0152
2095	377.22	3	0.00109073	RRGFPMLPR	FALSE	9	H0YMU8	NA_NA_NA_NA_NA_NA_NA_NA_NA_NA_NA	0.0152
2096	398.269	3	0.00105407	RRAALGLLPLL	FALSE	11	Q6UXH1	NA_NA_NA_NA_NA_NA_NA_NA_NA_NA_NA_NA_NA	0.0152
2097	548.346	2	-0.00251488	KRLDLAGPLL	FALSE	10	P30876	NA_NA_NA_NA_NA_NA_NA_NA_NA_NA_NA_NA	0.0152
2098	412.871	3	0.000454402	HRMSHLPPDF	FALSE	10	Q9UK41	NA_NA_NA_NA_NA_NA_NA_NA_NA_NA_NA_NA	0.0152
2099	510.285	2	-0.000714378	VRNNIAYGL	FALSE	9	E7ENX8	NA_NA_NA_NA_NA_NA_NA_NA_NA_NA_NA	0.0152
2100	596.761	2	0.000142117	TRNDYVMMY	FALSE	9	Q96QU8	NA_NA_NA_NA_NA_NA_NA_NA_NA_NA_NA	0.0152
2101	509.762	2	-0.000703377	SRMPLMNGL	FALSE	9	Q8NEZ4	NA_NA_NA_NA_NA_NA_NA_NA_NA_NA_NA	0.0152
2102	562.796	2	-0.000245878	LRNQSVFNF	FALSE	9	P37268	NA_NA_NA_NA_NA_NA_NA_NA_NA_NA_NA	0.0152
2103	463.24	2	-0.00117188	GRFSSTTGL	FALSE	9	P51817	NA_NA_NA_NA_NA_NA_NA_NA_NA_NA_NA	0.0152
2104	687.818	2	0.00114662	ARAFPMPGFDEH	FALSE	12	P34897	NA_NA_NA_NA_NA_NA_NA_NA_NA_NA_NA_NA_NA_NA	0.0152
2105	382.874	3	0.000515407	GRLLFQHEF	FALSE	9	Q9NWF9	NA_NA_NA_NA_NA_NA_NA_NA_NA_NA_NA	0.0152
2106	542.299	2	-0.00216488	HRLPVEVAY	FALSE	9	Q15149	NA_NA_NA_NA_NA_NA_NA_NA_NA_NA_NA	0.0152
2107	417.551	3	0.000904405	SRMIDIQTRM	FALSE	10	O43709	NA_NA_NA_NA_NA_NA_NA_NA_NA_NA_NA_NA	0.0152
2109	378.56	3	-0.000906264	QRLSFLLEK	FALSE	9	Q14094	NA_NA_NA_NA_NA_NA_NA_NA_NA_NA_NA	0.0152
2110	617.813	2	-0.00203638	QRFLQEWEV	FALSE	9	Q9NRP4	NA_NA_NA_NA_NA_NA_NA_NA_NA_NA_NA	0.0152
2111	470.238	3	-0.000352268	RRMWPLAFGSGM	FALSE	12	Q5TGZ0	NA_NA_NA_NA_NA_NA_NA_NA_NA_NA_NA_NA_NA_NA	0.0163
2112	508.269	2	-0.00106438	GRLGSFHEL	FALSE	9	Q5H9R7	NA_NA_NA_NA_NA_NA_NA_NA_NA_NA_NA	0.0163
2113	581.788	2	0.00053612	HRLNTIMDY	FALSE	9	P33527	NA_NA_NA_NA_NA_NA_NA_NA_NA_NA_NA	0.0163
2114	852.889	2	-0.00492038	RRFMEKNPDAYDY	FALSE	13	Q9H8Y5	NA_NA_NA_NA_NA_NA_NA_NA_NA_NA_NA_NA_NA_NA_NA	0.0163
2115	412.914	3	0.0051944	TRILFFNTPK	FALSE	10	P48556	NA_NA_NA_NA_NA_NA_NA_NA_NA_NA_NA_NA	0.0165
2116	680.892	2	-0.00489488	HRSPHIPYKLL	FALSE	11	Q9UPT9	NA_NA_NA_NA_NA_NA_NA_NA_NA_NA_NA_NA_NA	0.0165
2117	650.355	2	0.00236312	ASQSMPTIPALAL	FALSE	13	Q92608	NA_NA_NA_NA_NA_NA_NA_NA_NA_NA_NA_NA_NA_NA_NA	0.0165
2118	362.899	3	-0.000565259	GRLQKLLKM	FALSE	9	Q16881	NA_NA_NA_NA_NA_NA_NA_NA_NA_NA_NA	0.0165
2119	451.944	3	5.50652e-05	RRLLQPKNVMV	FALSE	11	P23258	NA_NA_NA_NA_NA_NA_NA_NA_NA_NA_NA_NA_NA	0.0165
2120	357.543	3	0.000553405	QRLPGQKPF	FALSE	9	Q6P996	NA_NA_NA_NA_NA_NA_NA_NA_NA_NA_NA	0.0165
2121	525.28	2	-0.000832879	GRFPQVQAF	FALSE	9	O60613	NA_NA_NA_NA_NA_NA_NA_NA_NA_NA_NA	0.0165
2122	483.791	2	-3.28771e-05	RVTGPVPGAL	FALSE	10	Q9H8L6	NA_NA_NA_NA_NA_NA_NA_NA_NA_NA_NA_NA	0.0165
2123	465.251	3	-0.000326259	MRAELGEYIRR	FALSE	11	Q14204	NA_NA_NA_NA_NA_NA_NA_NA_NA_NA_NA_NA_NA	0.0165
2124	625.847	2	-0.00157888	VRNGIYPLTAF	FALSE	11	Q9UHY1	NA_NA_NA_NA_NA_NA_NA_NA_NA_NA_NA_NA_NA	0.0165
2125	529.808	2	0.000363116	TFLVHLVVM	FALSE	9	Q9NPG8	NA_NA_NA_NA_NA_NA_NA_NA_NA_NA_NA	0.0165
2126	359.212	4	0.000913296	IRILLRDSYER	FALSE	11	Q96TA2	NA_NA_NA_NA_NA_NA_NA_NA_NA_NA_NA_NA_NA	0.0165
2128	512.321	2	0.00164312	TRSAIILHL	FALSE	9	P53350	NA_NA_NA_NA_NA_NA_NA_NA_NA_NA_NA	0.0165
2130	647.388	2	-0.00663088	IIQFISALLLY	FALSE	11	Q4VNC0	NA_NA_NA_NA_NA_NA_NA_NA_NA_NA_NA_NA_NA	0.0165
2132	358.886	3	-0.000412932	KRFQVAVNL	FALSE	9	Q9C037	NA_NA_NA_NA_NA_NA_NA_NA_NA_NA_NA	0.0165
2133	414.892	3	0.000484403	GRIGELQGHYL	FALSE	11	Q16549	NA_NA_NA_NA_NA_NA_NA_NA_NA_NA_NA_NA_NA	0.0165
2135	382.225	3	-0.00011693	ARIWDVRTK	FALSE	9	O43660	NA_NA_NA_NA_NA_NA_NA_NA_NA_NA_NA	0.0165
2136	478.78	2	-6.43785e-05	IRSGISPNL	FALSE	9	Q6UVJ0	NA_NA_NA_NA_NA_NA_NA_NA_NA_NA_NA	0.0165
2138	521.295	2	-0.00118238	SRVPVYAHI	FALSE	9	Q5T6F0	NA_NA_NA_NA_NA_NA_NA_NA_NA_NA_NA	0.0165
2139	522.852	2	0.00100662	KRLGILVVF	FALSE	9	Q6UWH6	NA_NA_NA_NA_NA_NA_NA_NA_NA_NA_NA	0.0165
2140	756.429	2	0.000541118	FQNLWKPRLNVP	FALSE	12	O60573	NA_NA_NA_NA_NA_NA_NA_NA_NA_NA_NA_NA_NA_NA	0.0165
2141	731.859	2	-0.00216138	QRSYLVQYMQF	FALSE	11	Q92900	NA_NA_NA_NA_NA_NA_NA_NA_NA_NA_NA_NA_NA	0.0165
2142	632.348	2	-0.00365088	KRFEEETVLL	FALSE	10	Q96G01	NA_NA_NA_NA_NA_NA_NA_NA_NA_NA_NA_NA	0.0165
2143	436.239	3	-2.62664e-05	ARHLHPIQTSF	FALSE	11	Q8TEM1	NA_NA_NA_NA_NA_NA_NA_NA_NA_NA_NA_NA_NA	0.017
2144	461.277	3	-0.00199927	YRYEVLKIIGK	FALSE	11	O43781	NA_NA_NA_NA_NA_NA_NA_NA_NA_NA_NA_NA_NA	0.017
2145	463.578	3	-0.000174594	MRIAPELYHKM	FALSE	11	Q15046	NA_NA_NA_NA_NA_NA_NA_NA_NA_NA_NA_NA_NA	0.017
2146	465.245	3	-0.000958259	YRKGLIDHQTY	FALSE	11	Q15149	NA_NA_NA_NA_NA_NA_NA_NA_NA_NA_NA_NA_NA	0.017
2147	552.828	2	-0.00228888	IRDAFLTRL	FALSE	9	Q5SRE5	NA_NA_NA_NA_NA_NA_NA_NA_NA_NA_NA	0.017
2148	744.87	2	-0.00605288	ARIGITNHDEYSL	FALSE	13	Q9Y490	NA_NA_NA_NA_NA_NA_NA_NA_NA_NA_NA_NA_NA_NA_NA	0.017
2149	546.285	2	-0.00229988	GRKETVWCL	FALSE	9	P01909	NA_NA_NA_NA_NA_NA_NA_NA_NA_NA_NA	0.017
2150	465.247	3	0.000342072	HRLDHLVEIDF	FALSE	11	Q9NYK1	NA_NA_NA_NA_NA_NA_NA_NA_NA_NA_NA_NA_NA	0.017
2151	407.56	3	7.02111e-08	LRWAPDGRHL	FALSE	10	Q12834	NA_NA_NA_NA_NA_NA_NA_NA_NA_NA_NA_NA	0.017
2152	674.375	2	-0.00567838	QRWLKGQGVYL	FALSE	11	P30040	NA_NA_NA_NA_NA_NA_NA_NA_NA_NA_NA_NA_NA	0.017
2153	432.576	3	0.00212541	KRISVDEALQH	FALSE	11	P45983	NA_NA_NA_NA_NA_NA_NA_NA_NA_NA_NA_NA_NA	0.017
2154	649.862	2	-0.00447238	ARAKIPLGFYY	FALSE	11	Q9NR09	NA_NA_NA_NA_NA_NA_NA_NA_NA_NA_NA_NA_NA	0.0174
2155	615.321	2	-0.00417138	RRLFPYSQY	FALSE	9	P49642	NA_NA_NA_NA_NA_NA_NA_NA_NA_NA_NA	0.0174
2156	525.794	2	0.0112956	SRQLITEGF	FALSE	9	Q14191	NA_NA_NA_NA_NA_NA_NA_NA_NA_NA_NA	0.0174
[truncated: 169 more rows]

## Sheet: HLA-C04 (121)
n	m/z	z	mzError	peptide	length	Uniprot AN	mods	FDR peptide
57	516.761	2	-0.00182638	MFDIVGTHL	9	O75618	NA_NA_NA_NA_NA_NA_NA_NA_NA_NA_NA	0
69	541.743	2	-0.000644375	SFDETVTHF	9	Q92547	NA_NA_NA_NA_NA_NA_NA_NA_NA_NA_NA	0.0011
99	506.755	2	0.00111862	DFDVAVVTF	9	Q460N5	NA_NA_NA_NA_NA_NA_NA_NA_NA_NA_NA	0.0009
122	517.767	2	0.00116512	SMDPLPVFL	9	Q7Z3K3	NA_NA_MetOX_NA_NA_NA_NA_NA_NA_NA_NA	0.0008
133	511.262	2	-0.00221338	NYDIAIAEL	9	Q96Q89	NA_NA_NA_NA_NA_NA_NA_NA_NA_NA_NA	0.0008
158	493.774	2	0.00413412	VFDTAIAHL	9	O43255	NA_NA_NA_NA_NA_NA_NA_NA_NA_NA_NA	0.0012
171	510.279	2	-0.00119788	VFDEAIRAV	9	P15153	NA_NA_NA_NA_NA_NA_NA_NA_NA_NA_NA	0.0011
194	514.74	2	-0.00215938	LFDPMTGTF	9	P29083	NA_NA_NA_NA_NA_NA_NA_NA_NA_NA_NA	0.001
214	524.74	2	-0.00249088	HFDDTVVCL	9	Q00839	NA_NA_NA_NA_NA_NA_NA_NA_NA_NA_NA	0.0009
234	579.768	2	0.00130262	RFDESMQVF	9	Q96JC1	NA_NA_NA_NA_NA_NA_NA_NA_NA_NA_NA	0.0009
241	566.82	2	-0.00192988	VFDEAIRAVL	10	P15153	NA_NA_NA_NA_NA_NA_NA_NA_NA_NA_NA_NA	0.0009
246	528.79	2	1.6209e-06	AWDKEPVLV	9	O95167	NA_NA_NA_NA_NA_NA_NA_NA_NA_NA_NA	0.0014
258	554.733	2	-0.000477379	HYDPATEEF	9	O15254	NA_NA_NA_NA_NA_NA_NA_NA_NA_NA_NA	0.0013
260	529.762	2	-0.00174888	FFEVSPVSF	9	Q8N543	NA_NA_NA_NA_NA_NA_NA_NA_NA_NA_NA	0.0013
332	500.729	2	0.000504621	SFDGIIAMM	9	P63272	NA_NA_NA_NA_NA_NA_NA_NA_MetOX_NA_NA	0.001
337	590.289	2	0.000380123	QWDLVENYL	9	Q13535	NA_NA_NA_NA_NA_NA_NA_NA_NA_NA_NA	0.001
338	602.782	2	-0.00394388	FFDATDRVSF	10	P17010-3	NA_NA_NA_NA_NA_NA_NA_NA_NA_NA_NA_NA	0.001
339	536.788	2	0.00034462	HFDLSVIEL	9	O75419	NA_NA_NA_NA_NA_NA_NA_NA_NA_NA_NA	0.001
341	562.773	2	-0.00184788	FWDPSVNLF	9	O60341	NA_NA_NA_NA_NA_NA_NA_NA_NA_NA_NA	0.001
365	554.258	2	-0.00156188	HFDDFVTNL	9	P35610	NA_NA_NA_NA_NA_NA_NA_NA_NA_NA_NA	0.0015
385	571.774	2	-0.00391938	AFDLTEQRY	9	Q86UE8	NA_NA_NA_NA_NA_NA_NA_NA_NA_NA_NA	0.002
415	544.791	2	-0.00214088	FFDPSLLHL	9	Q96S52	NA_NA_NA_NA_NA_NA_NA_NA_NA_NA_NA	0.0021
418	575.76	2	-0.000649879	IYDFIGEFM	9	Q9BVK8	NA_NA_NA_NA_NA_NA_NA_NA_NA_MetOX_NA	0.0021
420	464.76	2	-0.000909883	VFDPVPVGV	9	Q08211	NA_NA_NA_NA_NA_NA_NA_NA_NA_NA_NA	0.0021
422	542.261	2	0.00153862	NFDNILNSF	9	Q9ULQ1	NA_NA_NA_NA_NA_NA_NA_NA_NA_NA_NA	0.0021
440	556.287	2	-0.00247388	LYDLVTEKM	9	Q9H173	NA_NA_NA_NA_NA_NA_NA_NA_NA_NA_NA	0.0023
444	523.731	2	0.00353612	AFDEAFAEF	9	P54296	NA_NA_NA_NA_NA_NA_NA_NA_NA_NA_NA	0.0023
476	477.232	2	-0.000612878	SFDSALQSV	9	P49792	NA_NA_NA_NA_NA_NA_NA_NA_NA_NA_NA	0.0022
489	567.305	2	0.00172712	VFDTAIAHLF	10	O43255	NA_NA_NA_NA_NA_NA_NA_NA_NA_NA_NA_NA	0.0024
527	489.741	2	-0.00161388	AFDEAIAEL	9	P31946	NA_NA_NA_NA_NA_NA_NA_NA_NA_NA_NA	0.0032
571	567.732	2	-0.00348588	YFDDALEDF	9	Q5I0X7	NA_NA_NA_NA_NA_NA_NA_NA_NA_NA_NA	0.0033
672	553.234	2	-0.00102938	SFDETCTRF	9	O15530	NA_NA_NA_NA_NA_NA_NA_NA_NA_NA_NA	0.004
685	563.836	2	-0.00112588	KMEHLLLKV	9	P78396	NA_NA_MetOX_NA_NA_NA_NA_NA_NA_NA_NA	0.0039
698	524.306	2	-0.00202388	LYDPVISKL	9	Q96EZ8	NA_NA_NA_NA_NA_NA_NA_NA_NA_NA_NA	0.004
730	535.286	2	-0.00242288	VYDLSIRGF	9	Q15631	NA_NA_NA_NA_NA_NA_NA_NA_NA_NA_NA	0.0041
781	520.279	2	0.00177612	AFDLSQVLF	9	Q86WA8	NA_NA_NA_NA_NA_NA_NA_NA_NA_NA_NA	0.0048
795	512.268	2	-0.000876378	RYDLGGLVM	9	Q15274	NA_NA_NA_NA_NA_NA_NA_NA_NA_NA_NA	0.0048
830	614.256	2	-0.00135138	HYDEQQNFF	9	Q9NWT6	NA_NA_NA_NA_NA_NA_NA_NA_NA_NA_NA	0.0048
842	540.755	2	0.00128762	TFDDIVHSF	9	P49327	NA_NA_NA_NA_NA_NA_NA_NA_NA_NA_NA	0.0048
847	529.753	2	0.00152662	YFDPANGKF	9	P13639	NA_NA_NA_NA_NA_NA_NA_NA_NA_NA_NA	0.0048
859	376.219	3	0.00134907	HFDIVIRNL	9	Q9H0K6	NA_NA_NA_NA_NA_NA_NA_NA_NA_NA_NA	0.0047
861	482.247	2	0.000322119	MFDEPVLL	8	O75592	NA_NA_NA_NA_NA_NA_NA_NA_NA_NA	0.0047
886	584.287	2	-0.00151988	YFDEPVELR	9	Q9NP61	NA_NA_NA_NA_NA_NA_NA_NA_NA_NA_NA	0.0047
933	382.555	3	0.000236737	VFDIVIHRF	9	Q9ULK4	NA_NA_NA_NA_NA_NA_NA_NA_NA_NA_NA	0.0055
937	534.746	2	-0.000284379	TYDLQESNV	9	Q14141	NA_NA_NA_NA_NA_NA_NA_NA_NA_NA_NA	0.0058
939	509.286	2	0.000551119	KFDPVGEIL	9	Q659A1	NA_NA_NA_NA_NA_NA_NA_NA_NA_NA_NA	0.0058
941	482.736	2	0.00121112	AFDDAIAEL	9	P62258	NA_NA_NA_NA_NA_NA_NA_NA_NA_NA_NA	0.0058
962	562.291	2	-0.00250488	SFDLLPREF	9	O94864	NA_NA_NA_NA_NA_NA_NA_NA_NA_NA_NA	0.0059
966	571.78	2	-0.00191638	FFDEVVKQM	9	Q9H8M1	NA_NA_NA_NA_NA_NA_NA_NA_NA_NA_NA	0.0061
999	506.236	2	-0.00126438	YFDEPVEL	8	Q9NP61	NA_NA_NA_NA_NA_NA_NA_NA_NA_NA	0.0064
1009	542.277	2	-0.000355382	HFDPEVVQI	9	Q9NS73	NA_NA_NA_NA_NA_NA_NA_NA_NA_NA_NA	0.0066
1043	506.261	2	-0.000473881	KFDDGAVFL	9	O14974	NA_NA_NA_NA_NA_NA_NA_NA_NA_NA_NA	0.0069
1050	453.75	2	-0.000841885	VFDLAQTL	8	Q9UKW4	NA_NA_NA_NA_NA_NA_NA_NA_NA_NA	0.0069
1067	522.258	2	0.00141262	FFDTNTSVL	9	Q14008	NA_NA_NA_NA_NA_NA_NA_NA_NA_NA_NA	0.0068
1068	526.287	2	-0.000887881	IFDSKVTEI	9	Q9H8V3	NA_NA_NA_NA_NA_NA_NA_NA_NA_NA_NA	0.0068
1076	550.259	2	0.00178062	RFEDSPSYV	9	O60264	NA_NA_NA_NA_NA_NA_NA_NA_NA_NA_NA	0.0068
1079	577.256	2	-0.00257088	VFDVLDGEEM	10	Q8N1G2	NA_NA_NA_NA_NA_NA_NA_NA_NA_NA_NA_NA	0.0068
1090	553.779	2	-0.00153038	VFDWIEANL	9	Q04637	NA_NA_NA_NA_NA_NA_NA_NA_NA_NA_NA	0.007
1101	463.751	2	-0.00188488	VYDIAAKF	8	O00116	NA_NA_NA_NA_NA_NA_NA_NA_NA_NA	0.007
1119	601.333	2	-0.00157288	FFDPSLLHLL	10	Q96S52	NA_NA_NA_NA_NA_NA_NA_NA_NA_NA_NA_NA	0.0068
1121	466.237	2	-0.000901881	VFDPIGHF	8	O60885	NA_NA_NA_NA_NA_NA_NA_NA_NA_NA	0.0068
1122	496.25	2	-0.000251879	AWDIAIATM	9	Q02790	NA_NA_NA_NA_NA_NA_NA_NA_NA_NA_NA	0.0068
1127	528.758	2	-9.87608e-06	YFDAIPVTM	9	Q8NF37	NA_NA_NA_NA_NA_NA_NA_NA_NA_NA_NA	0.0068
1176	493.729	2	0.00123662	TFDIASDAF	9	Q9Y376	NA_NA_NA_NA_NA_NA_NA_NA_NA_NA_NA	0.0068
1196	570.306	2	-0.00345538	FYDERIVVV	9	Q9P265	NA_NA_NA_NA_NA_NA_NA_NA_NA_NA_NA	0.0067
1203	566.779	2	0.000123123	KFDPMGKYF	9	Q96J01	NA_NA_NA_NA_NA_NA_NA_NA_NA_NA_NA	0.0067
1204	518.288	2	-0.00233088	VFDKTLAEL	9	Q6VMQ6	NA_NA_NA_NA_NA_NA_NA_NA_NA_NA_NA	0.0067
1220	562.771	2	-0.00143688	HWDPQEVTL	9	Q9HBU6	NA_NA_NA_NA_NA_NA_NA_NA_NA_NA_NA	0.0067
1221	497.269	2	0.00174412	VFDTSIAQL	9	Q8IUQ4	NA_NA_NA_NA_NA_NA_NA_NA_NA_NA_NA	0.0067
1224	558.767	2	-0.00127488	YFDLLGELM	9	Q8TEL6	NA_NA_NA_NA_NA_NA_NA_NA_NA_MetOX_NA	0.0067
1227	536.255	2	0.000955118	FFDNISSEL	9	Q9BX40	NA_NA_NA_NA_NA_NA_NA_NA_NA_NA_NA	0.0067
1351	531.295	2	-0.00265638	DYDPLVVKL	9	Q96A65	NA_NA_NA_NA_NA_NA_NA_NA_NA_NA_NA	0.0068
1374	482.752	2	-0.00168138	IFDEAEKL	8	Q9H497	NA_NA_NA_NA_NA_NA_NA_NA_NA_NA	0.0067
1385	463.734	2	-0.000991884	IFDLGGGTF	9	P11142	NA_NA_NA_NA_NA_NA_NA_NA_NA_NA_NA	0.0067
1395	558.791	2	-0.000984375	YYDGKVMKL	9	P11387	NA_NA_NA_NA_NA_NA_NA_NA_NA_NA_NA	0.007
1409	556.8	2	-0.00310638	YYDVAKQLL	9	Q6UB99	NA_NA_NA_NA_NA_NA_NA_NA_NA_NA_NA	0.0071
1436	440.713	2	-0.000959875	AFDPAAAAF	9	Q01892	NA_NA_NA_NA_NA_NA_NA_NA_NA_NA_NA	0.0073
1437	386.214	3	-0.00018393	YYDEKVVKL	9	Q96GW9	NA_NA_NA_NA_NA_NA_NA_NA_NA_NA_NA	0.0073
1441	561.29	2	0.00481962	HYDVQSILF	9	O43166	NA_NA_NA_NA_NA_NA_NA_NA_NA_NA_NA	0.0072
1479	499.237	2	-0.00245288	FFDDPMLL	8	Q15029	NA_NA_NA_NA_NA_NA_NA_NA_NA_NA	0.008
1498	528.764	2	-0.00208838	SFDTIPTYL	9	P45844	NA_NA_NA_NA_NA_NA_NA_NA_NA_NA_NA	0.0079
1504	544.245	2	-0.00254038	SFDVADRMF	9	Q6ZS81	NA_NA_NA_NA_NA_NA_NA_NA_NA_NA_NA	0.0079
1518	593.766	2	-0.00101638	SYDPTIENTF	10	Q15382	NA_NA_NA_NA_NA_NA_NA_NA_NA_NA_NA_NA	0.0081
1523	527.229	2	-0.000971379	QYDEAVAQF	9	P49321	pyrGlu_NA_NA_NA_NA_NA_NA_NA_NA_NA_NA	0.0081
1525	634.321	2	0.00104912	TFDVAPSRLDF	11	Q5JPE7	NA_NA_NA_NA_NA_NA_NA_NA_NA_NA_NA_NA_NA	0.0083
1529	553.795	2	-0.00151188	NYDEALRLL	9	Q9HCS7	NA_NA_NA_NA_NA_NA_NA_NA_NA_NA_NA	0.0083
1531	500.26	2	-0.00157438	YYDVAKQL	8	Q6UB99	NA_NA_NA_NA_NA_NA_NA_NA_NA_NA	0.0083
1534	493.258	2	-0.000865379	IFDGNVAHI	9	P46939	NA_NA_NA_NA_NA_NA_NA_NA_NA_NA_NA	0.0083
1537	523.744	2	0.000154621	HYDAVEAEL	9	Q14320	NA_NA_NA_NA_NA_NA_NA_NA_NA_NA_NA	0.0083
1598	461.25	2	-7.43804e-05	IFDIATEL	8	P11182	NA_NA_NA_NA_NA_NA_NA_NA_NA_NA	0.0088
1610	503.271	2	-0.00157238	TFDVAPSRL	9	Q5JPE7	NA_NA_NA_NA_NA_NA_NA_NA_NA_NA_NA	0.0088
1631	394.538	3	9.40801e-06	YYDPKHVIF	9	Q9NUQ8	NA_NA_NA_NA_NA_NA_NA_NA_NA_NA_NA	0.0088
1635	561.304	2	-7.33781e-05	IFDPVKQQF	9	Q9P2D1	NA_NA_NA_NA_NA_NA_NA_NA_NA_NA_NA	0.0088
1728	473.723	2	-0.00185838	VWDVGSHF	8	Q8IVW1	NA_NA_NA_NA_NA_NA_NA_NA_NA_NA	0.011
1746	556.298	2	0.00248362	IFDVLPNFF	9	Q13085	NA_NA_NA_NA_NA_NA_NA_NA_NA_NA_NA	0.011
1813	628.273	2	0.00310362	YFDPQYFEF	9	Q13347	NA_NA_NA_NA_NA_NA_NA_NA_NA_NA_NA	0.0115
1823	508.214	2	-0.00115138	AFDNMVTSM	9	Q9UL33	NA_NA_NA_NA_NA_NA_NA_NA_NA_NA_NA	0.0117
1824	530.252	2	-0.00144488	TFDNVTSYL	9	P57081	NA_NA_NA_NA_NA_NA_NA_NA_NA_NA_NA	0.0117
1836	592.285	2	-0.00258838	IWDETPLYF	9	P15559	NA_NA_NA_NA_NA_NA_NA_NA_NA_NA_NA	0.0116
1839	539.796	2	-0.0150304	VYDLLKTNL	9	Q99460	NA_NA_NA_NA_NA_NA_NA_NA_NA_NA_NA	0.0116
1847	559.245	2	-0.00290638	YFDDLKGEM	9	Q14692	NA_NA_NA_NA_NA_NA_NA_NA_NA_NA_NA	0.0116
1879	538.809	2	-0.00213388	FWDGKIVLV	9	Q56NI9	NA_NA_NA_NA_NA_NA_NA_NA_NA_NA_NA	0.0116
1893	524.804	2	-0.00174788	SFDLLVKNL	9	Q9HB71	NA_NA_NA_NA_NA_NA_NA_NA_NA_NA_NA	0.0116
1896	537.231	2	-0.00211338	FYDPDVGNF	9	O15379	NA_NA_NA_NA_NA_NA_NA_NA_NA_NA_NA	0.0118
1932	559.292	2	-0.00173988	RFDPLGHYL	9	Q9C0C7	NA_NA_NA_NA_NA_NA_NA_NA_NA_NA_NA	0.0121
1953	540.277	2	0.000833621	VFDDMINLL	9	Q6NUQ1	NA_NA_NA_NA_NA_NA_NA_NA_NA_NA_NA	0.0121
1977	462.742	2	-0.00174738	SFDSTVRL	8	O60907	NA_NA_NA_NA_NA_NA_NA_NA_NA_NA	0.013
1992	544.277	2	-0.00594038	LYDIFRNF	8	O75310	NA_NA_NA_NA_NA_NA_NA_NA_NA_NA	0.0133
2032	619.79	2	-0.00099588	FYDLYGGEKF	10	P29350	NA_NA_NA_NA_NA_NA_NA_NA_NA_NA_NA_NA	0.0138
2047	465.738	2	-0.000265878	QFDVATHL	8	Q9Y3A2	NA_NA_NA_NA_NA_NA_NA_NA_NA_NA	0.0138
2092	519.278	2	-0.00176338	IYDLATQTL	9	Q13685	NA_NA_NA_NA_NA_NA_NA_NA_NA_NA_NA	0.0152
2127	482.753	2	-0.000480879	AFDPTSTLL	9	Q12788	NA_NA_NA_NA_NA_NA_NA_NA_NA_NA_NA	0.0165
2129	531.784	2	0.00410062	EFDLLYPAI	9	Q8TDL5	pyrGlu_NA_NA_NA_NA_NA_NA_NA_NA_NA_NA	0.0165
2134	509.763	2	-0.00137988	IWDVSVNSV	9	O75083	NA_NA_NA_NA_NA_NA_NA_NA_NA_NA_NA	0.0165
2158	564.252	2	-0.00267688	NFDTIDQQF	9	Q8WYP5	NA_NA_NA_NA_NA_NA_NA_NA_NA_NA_NA	0.0174
2167	481.217	2	-0.00177438	FFESFGDL	8	P02042	NA_NA_NA_NA_NA_NA_NA_NA_NA_NA	0.0174
2192	581.776	2	-0.00115688	YFDVEPFVF	9	Q9H7Z6	NA_NA_NA_NA_NA_NA_NA_NA_NA_NA_NA	0.0177
2228	672.841	2	-0.00530238	FYEPQKGSIYL	11	O75027	NA_NA_NA_NA_NA_NA_NA_NA_NA_NA_NA_NA_NA	0.0179
2234	506.736	2	0.000311122	VFDFAGEEV	9	Q9UEE9	NA_NA_NA_NA_NA_NA_NA_NA_NA_NA_NA	0.0179
2319	587.787	2	-0.00180688	YFEELITML	9	Q00610	NA_NA_NA_NA_NA_NA_NA_NA_MetOX_NA_NA	0.0193
2338	509.784	2	4.11225e-05	VMDSKIVQV	9	P52294	NA_NA_NA_NA_NA_NA_NA_NA_NA_NA_NA	0.0199

## Sheet: HLA-B35 (42)
n	m/z	z	mzError	peptide	length	Uniprot AN	mods	FDR peptide
149	512.768	2	-0.00136238	HPISSEELL	9	P14921	NA_NA_NA_NA_NA_NA_NA_NA_NA_NA_NA	0.0012
269	508.276	2	-0.00230938	MPLGSAVDIL	10	P25205	NA_NA_NA_NA_NA_NA_NA_NA_NA_NA_NA_NA	0.0013
356	504.779	2	-0.00133388	HPDVLPFAL	9	Q9NU22	NA_NA_NA_NA_NA_NA_NA_NA_NA_NA_NA	0.0016
508	511.34	2	-0.00240088	IPSRLPLLL	9	Q86WA8	NA_NA_NA_NA_NA_NA_NA_NA_NA_NA_NA	0.0023
590	496.762	2	0.000227122	HPDQAQAIL	9	Q01082	NA_NA_NA_NA_NA_NA_NA_NA_NA_NA_NA	0.0035
639	500.314	2	-0.000339884	SPTLLITVR	9	Q7Z5M8	NA_NA_NA_NA_NA_NA_NA_NA_NA_NA_NA	0.0038
684	597.786	2	-0.00195288	YPFQDSEPVL	10	Q96RU7	NA_NA_NA_NA_NA_NA_NA_NA_NA_NA_NA_NA	0.0039
737	521.781	2	-0.00167338	NPQFLDPVL	9	Q9Y5L0	NA_NA_NA_NA_NA_NA_NA_NA_NA_NA_NA	0.0041
759	517.757	2	-0.00120638	MPDDLLTTL	9	P18848	NA_MetOX_NA_NA_NA_NA_NA_NA_NA_NA_NA	0.0043
776	487.266	2	0.00148762	NPISTVTEL	9	P50991	NA_NA_NA_NA_NA_NA_NA_NA_NA_NA_NA	0.0044
813	441.309	2	0.00150462	LPISLLLL	8	O00478	NA_NA_NA_NA_NA_NA_NA_NA_NA_NA	0.0049
829	499.777	2	0.00218612	LPVDLAEEL	9	P42771-4	NA_NA_NA_NA_NA_NA_NA_NA_NA_NA_NA	0.0048
921	585.309	2	-0.00352588	VPDSSGPERIL	11	P61978	NA_NA_NA_NA_NA_NA_NA_NA_NA_NA_NA_NA_NA	0.0054
1012	497.271	2	-0.00127238	SPNAEIHIL	9	Q14807	NA_NA_NA_NA_NA_NA_NA_NA_NA_NA_NA	0.0066
1174	620.831	2	1.66175e-05	LPEEEQQRVL	10	P17480	NA_NA_NA_NA_NA_NA_NA_NA_NA_NA_NA_NA	0.0068
1222	560.274	2	-0.00144338	HPISDHEATL	10	P03989;P30485	NA_NA_NA_NA_NA_NA_NA_NA_NA_NA_NA_NA	0.0067
1359	555.283	2	-0.00406588	NPMKLIQSY	9	Q0VAA2	NA_NA_NA_MetOX_NA_NA_NA_NA_NA_NA_NA	0.0067
1430	560.819	2	-0.00101038	MPVILLLTY	9	A0A096LNU4	Ac_MetOX_NA_NA_NA_NA_NA_NA_NA_NA_NA	0.0073
1621	506.764	2	5.41161e-05	LPSEVEPEL	9	Q9HAS0	NA_NA_NA_NA_NA_NA_NA_NA_NA_NA_NA	0.0088
1647	655.856	2	-0.00294338	FPEPNPRVIEL	11	P13612	NA_NA_NA_NA_NA_NA_NA_NA_NA_NA_NA_NA_NA	0.009
1717	502.773	2	-0.00154838	APEEHPVLL	9	P60709	NA_NA_NA_NA_NA_NA_NA_NA_NA_NA_NA	0.0106
1741	475.278	2	0.000441625	EPLRPGPAL	9	Q02080-2	NA_NA_NA_NA_NA_NA_NA_NA_NA_NA_NA	0.011
1797	563.797	2	-0.00165488	HPIDGFLQSL	10	O75845	NA_NA_NA_NA_NA_NA_NA_NA_NA_NA_NA_NA	0.0115
1850	498.813	2	0.00470862	LPQLTQALL	9	D6RFI8	NA_NA_NA_NA_NA_NA_NA_NA_NA_NA_NA	0.0116
1875	508.751	2	-0.00172438	MPEDLVEAL	9	P51659	NA_NA_NA_NA_NA_NA_NA_NA_NA_NA_NA	0.0115
1922	523.296	2	-0.00449888	VPQSLFLEL	9	Q6PJG6-3	NA_NA_NA_NA_NA_NA_NA_NA_NA_NA_NA	0.0117
1972	545.274	2	-0.00322038	LPVEEFNEL	9	Q14494	NA_NA_NA_NA_NA_NA_NA_NA_NA_NA_NA	0.013
1974	516.288	2	-0.00467388	LPAEGALFLT	10	Q86WG5	NA_NA_NA_NA_NA_NA_NA_NA_NA_NA_NA_NA	0.013
2053	581.791	2	-0.00173838	YPVEIHEYL	9	Q13901	NA_NA_NA_NA_NA_NA_NA_NA_NA_NA_NA	0.0138
2059	522.223	2	0.00111162	EPNPDDPLM	9	Q9NPD8	NA_NA_NA_NA_NA_NA_NA_NA_NA_MetOX_NA	0.0142
2064	510.288	2	-0.00517338	LPSSFVEKL	9	Q96Q15	NA_NA_NA_NA_NA_NA_NA_NA_NA_NA_NA	0.0142
2131	516.788	2	0.00371862	FPSEDILLV	9	Q8WU10	NA_NA_NA_NA_NA_NA_NA_NA_NA_NA_NA	0.0165
2137	493.793	2	-0.000575377	LPHHILGSL	9	Q8TBZ2	NA_NA_NA_NA_NA_NA_NA_NA_NA_NA_NA	0.0165
2161	472.759	2	-0.00145238	MPADIATLL	9	Q9H4L7	NA_NA_NA_NA_NA_NA_NA_NA_NA_NA_NA	0.0174
2175	521.269	2	-0.00317238	FPNAIEHTL	9	P22314	NA_NA_NA_NA_NA_NA_NA_NA_NA_NA_NA	0.0174
2178	634.891	2	0.00458412	IPQVKTPLLLM	11	P13798	NA_NA_NA_NA_NA_NA_NA_NA_NA_NA_NA_MetOX_NA	0.0174
2229	506.319	2	-0.000857376	KPQLRLEK	8	Q5EE01	NA_NA_NA_NA_NA_NA_NA_NA_NA_NA	0.0179
2235	553.331	2	0.00134362	LPDEIPLPLV	10	Q5TKA1	NA_NA_NA_NA_NA_NA_NA_NA_NA_NA_NA_NA	0.0179
2266	486.316	2	0.00493412	IPSKISTII	9	Q6ZS81	NA_NA_NA_NA_NA_NA_NA_NA_NA_NA_NA	0.0184
2307	535.788	2	0.000441118	FPEHIFPAL	9	P61160	NA_NA_NA_NA_NA_NA_NA_NA_NA_NA_NA	0.0193
2316	576.798	2	-0.00316288	FPFSDKLGEL	10	Q14677	NA_NA_NA_NA_NA_NA_NA_NA_NA_NA_NA_NA	0.0193
2328	514.266	2	-0.00349588	LPQEDLEAL	9	P30153	NA_NA_NA_NA_NA_NA_NA_NA_NA_NA_NA	0.0193

## Sheet: Background contaminants (10)
n	m/z	z	m/z Error	peptide	c04	length	Uniprot AN	mods	FDR peptide
84	501.285	2	-8.03846e-05	ASEAIKGAVVG	FALSE	11	P38646	NA_NA_NA_NA_NA_NA_NA_NA_NA_NA_NA_NA_NA	0.001
97	420.575	3	-0.000515598	LRVAPEEHPVL	FALSE	11	A5A3E0	NA_NA_NA_NA_NA_NA_NA_NA_NA_NA_NA_NA_NA	0.0009
357	489.737	2	-0.00106538	FNDTFVHV	FALSE	8	P62263	NA_NA_NA_NA_NA_NA_NA_NA_NA_NA	0.0016
785	444.728	2	-0.000851879	ETSAAAIML	FALSE	9	Q92665	pyrGlu_NA_NA_NA_NA_NA_NA_NA_NA_NA_NA	0.0048
831	505.305	2	-0.000815381	HVSLVQLTL	FALSE	9	P12004	NA_NA_NA_NA_NA_NA_NA_NA_NA_NA_NA	0.0048
1463	525.236	2	0.00110162	NTDEPPMVF	FALSE	9	P54578	NA_NA_NA_NA_NA_NA_NA_NA_NA_NA_NA	0.008
1481	601.268	2	-0.00130438	GGSFDVADRMF	FALSE	11	Q6ZS81	NA_NA_NA_NA_NA_NA_NA_NA_NA_NA_NA_NA_NA	0.008
1551	614.301	2	0.00201512	IAVGYVDDTQF	FALSE	11	P30504	NA_NA_NA_NA_NA_NA_NA_NA_NA_NA_NA_NA_NA	0.0082
1807	508.752	2	-0.00022388	EETMLVEAI	FALSE	9	A6NFC9	pyrGlu_NA_NA_NA_NA_NA_NA_NA_NA_NA_NA	0.0115
2108	470.774	2	-0.00309088	VLDELVRP	FALSE	8	Q14541	NA_NA_NA_NA_NA_NA_NA_NA_NA_NA	0.0152
